# Supplementary material for: Lysosomal and synaptic dysfunction markers in longitudinal cerebrospinal fluid of de novo Parkinson’s disease
Source: PubMed Central journal article supplement (PMC11101466; doi:10.1038/s41531-024-00714-1), 2024-05-17
Supplement: 41531_2024_714_MOESM1_ESM.pdf [file 41531_2024_714_MOESM1_ESM.pdf]

**Supplementary material for manuscript NPJPARKD-02485:**

**Lysosomal and synaptic dysfunction markers in longitudinal cerebrospinal fluid of de novo Parkinson's disease**

Michael Bartl<sup>1,2#</sup>, Johanna Nilsson<sup>3</sup> Mohammed Dakna<sup>1</sup>, Sandrina Weber<sup>1</sup>, Sebastian Schade<sup>4</sup>, Mary Xylaki<sup>1</sup>, Barbara Fernandes Gomes<sup>3</sup>, Marielle Ernst<sup>5</sup>, Maria-Lucia Muntean<sup>4</sup>, Friederike Sixel-Döring<sup>4,6</sup>, Claudia Trenkwalder<sup>4,7</sup>, Henrik Zetterberg<sup>8,9,10,11</sup>, Ann Brinkmalm<sup>8</sup>, Brit Mollenhauer<sup>1,4</sup>

<sup>1</sup> *Department of Neurology, University Medical Center Goettingen, Germany*

<sup>2</sup> *Institute for Neuroimmunology and Multiple Sclerosis Research, University Medical Center Goettingen, Germany*

<sup>3</sup> *Institute of Neuroscience and Physiology, The Sahlgrenska Academy at the University of Gothenburg, Mölndal, Sweden*

<sup>4</sup> *Paracelsus-Elena-Klinik, Kassel, Germany*

<sup>5</sup> *Institute of Diagnostic and Interventional Neuroradiology, University Medical Center Goettingen, Germany*

<sup>6</sup> *Department of Neurology, Philipps-University, Marburg, Germany*

<sup>7</sup> *Department of Neurosurgery, University Medical Center Goettingen, Robert-Koch Str. 40, 37075 Goettingen, Germany*

<sup>8</sup> *Clinical Neurochemistry Laboratory, Sahlgrenska University Hospital, Mölndal, Sweden*

<sup>9</sup> *UK Dementia Research Institute at UCL, London, United Kingdom*

<sup>10</sup> *Department of Neurodegenerative Disease, UCL Institute of Neurology, London, United Kingdom*

<sup>11</sup> *Hong Kong Center for Neurodegenerative Diseases, Hong Kong, China*

## Supplementary Figures

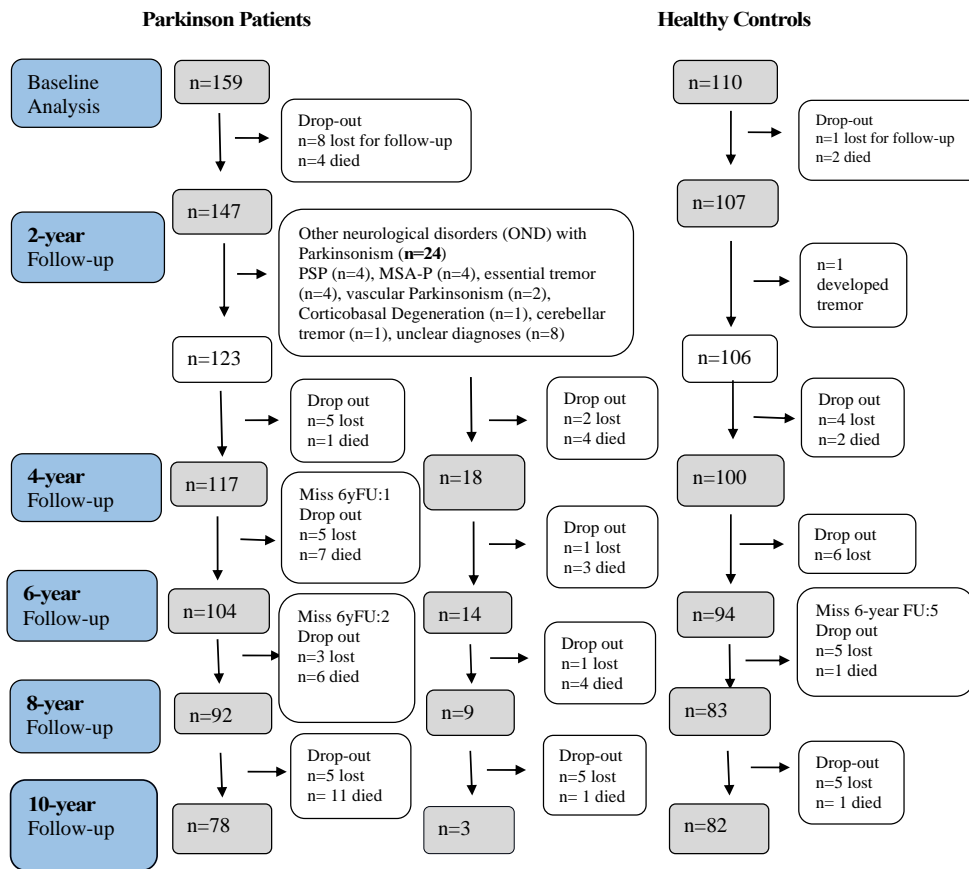

**Supplementary figure 1a:** Flow-chart of the DeNoPa cohort: Parkinson Patients and Healthy Controls

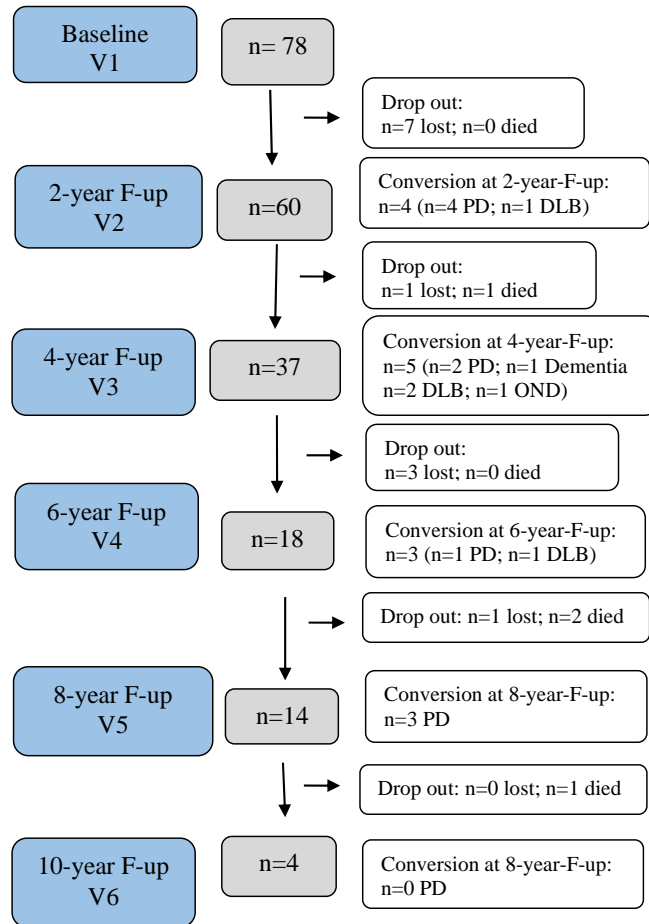

**Supplementary figure 1b:** Flow-chart of the iRBD cohort: isolated REM-sleep behavior disorder. The iRBD cohort is part of DeNoPa, a single center, longitudinal, observational study, still ongoing and recruiting iRBD subjects. Follow-up visits are conducted every two years for each single subject, explaining the differing numbers between the follow-up visits.

The figure displays the current numbers at the time point of publication. Dropouts are subjects that decided not to continue in the study

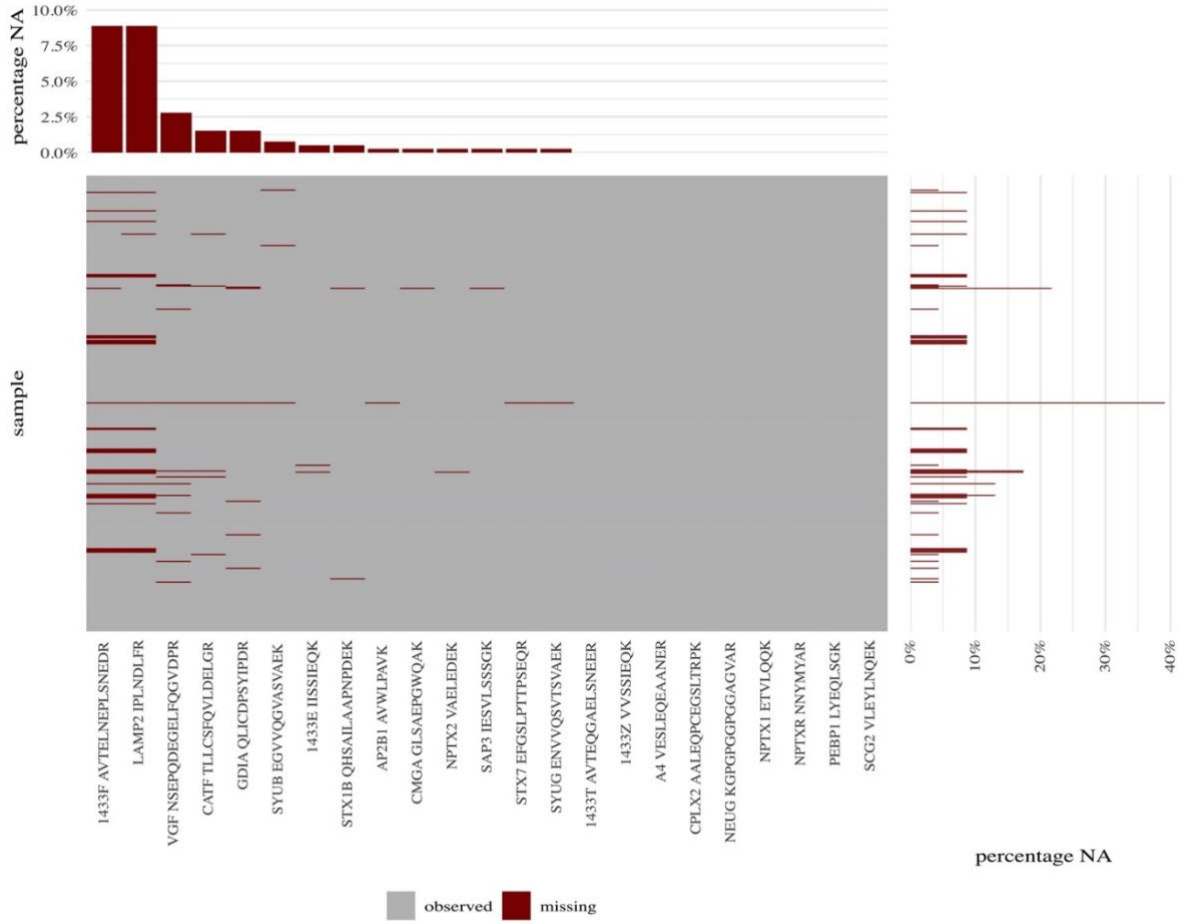

**Supplementary Figure 2:** Heat map displaying the percentage of missing data per peptide. Abbreviation: NA= not applicable

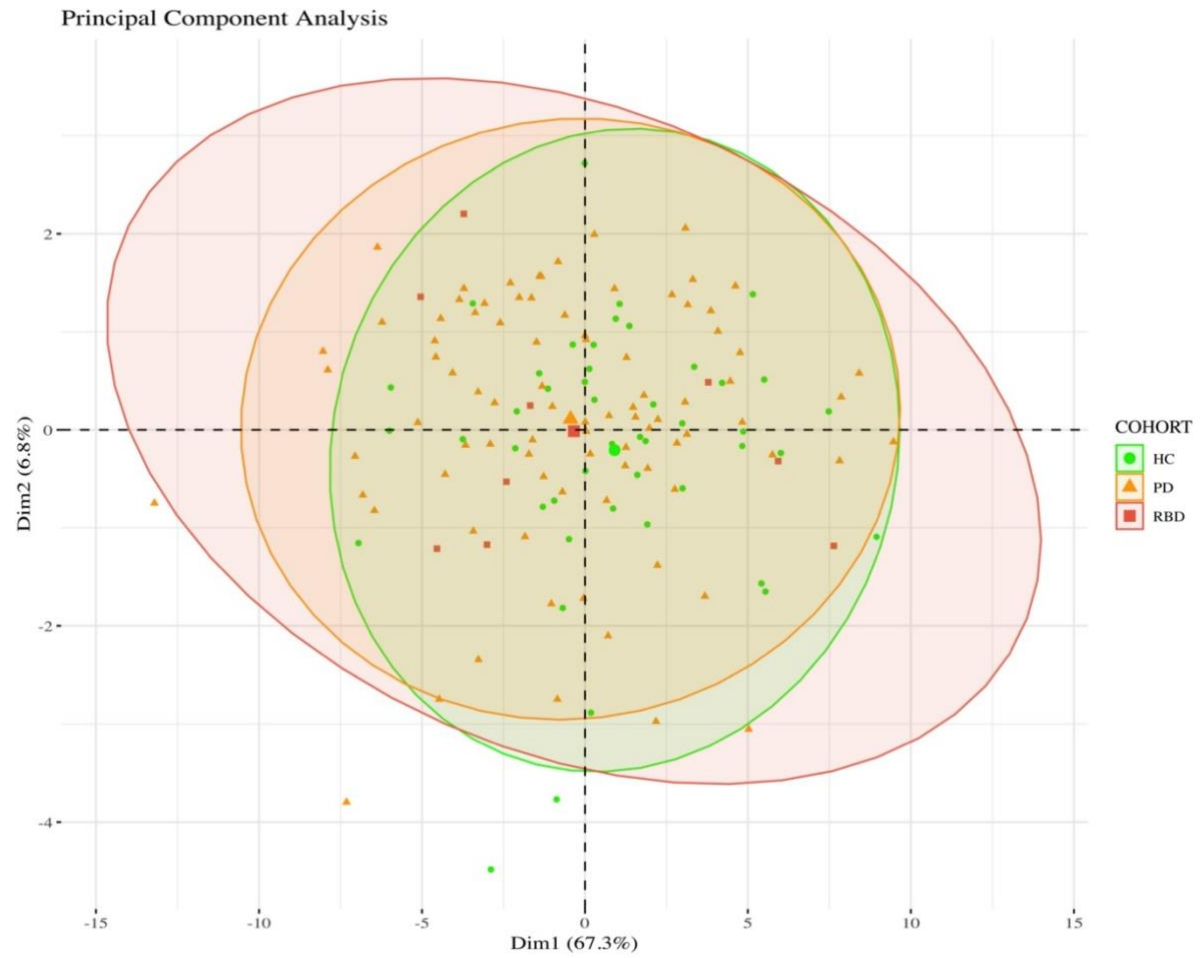

**Supplementary Figure 3:** Principal component analysis (PCA) showing, that the first component of the PCA explains 67% of the data variability, whereas the second component accounts for 7%.

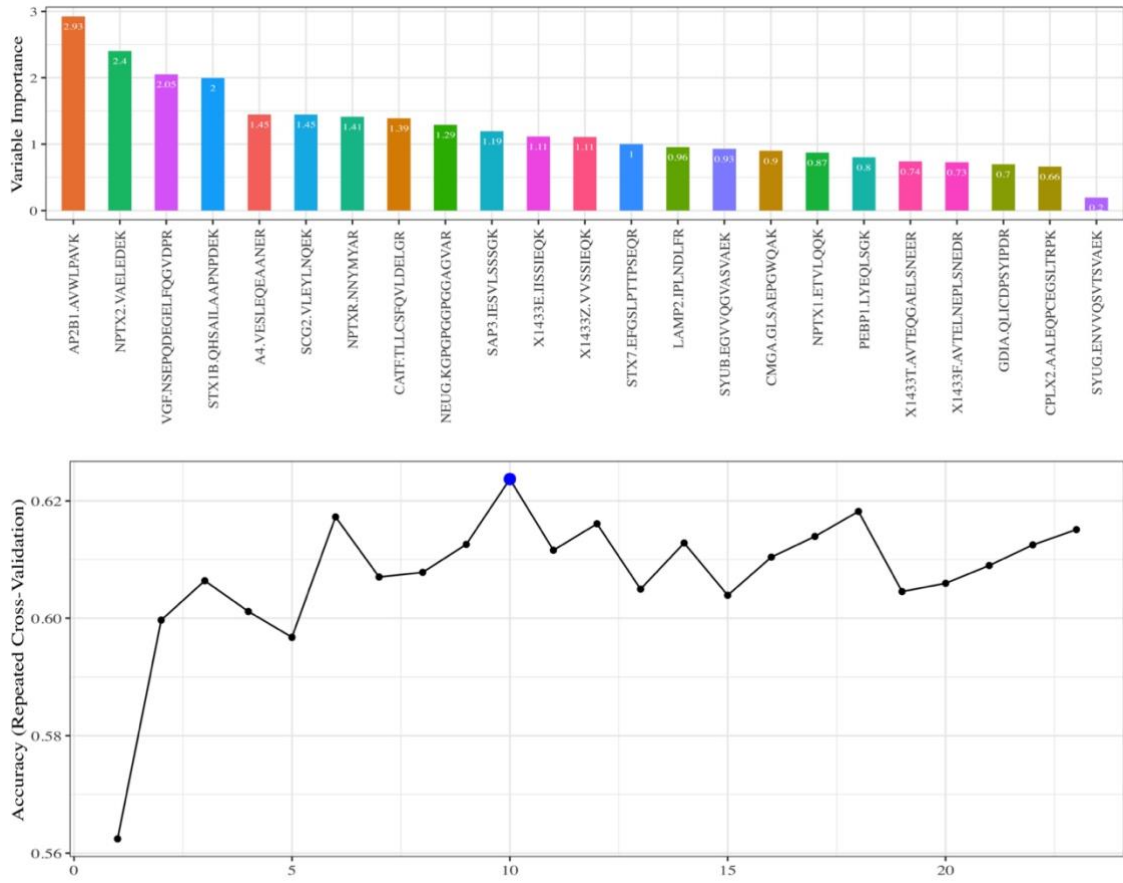

**Supplementary Figure 4a:** Results of Random forest classifier on the splitting of the baseline data set (88 PD/46 HC) based on 67% training data and 33% test data. Fivefold cross validation with 10 repetitions is used for building classifiers with 1 to 23 peptides. From the accuracy plot shows that a classifier with 10 peptides reaches the optimal accuracy of 0.622.

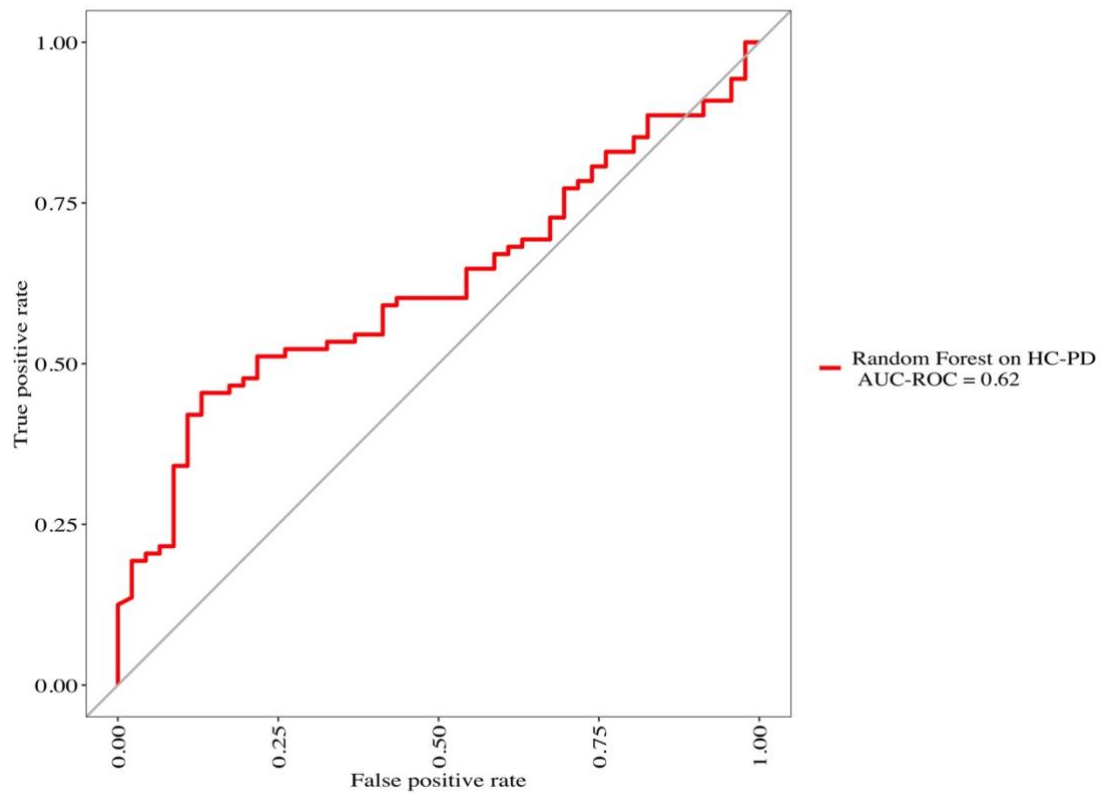

**Supplementary Figure 4b:** Results of Random forest classifier on the splitting of the baseline data set (88 PD/46 HC) based on 67% training data and 33% test data. Fivefold cross validation with 10 repetitions is used for building classifiers with 1 to 23 peptides. From the accuracy plot shows that a classifier with 10 peptides reaches the optimal accuracy of 0.622. The Area Under the Curve of the model on the test set is of 0.62.

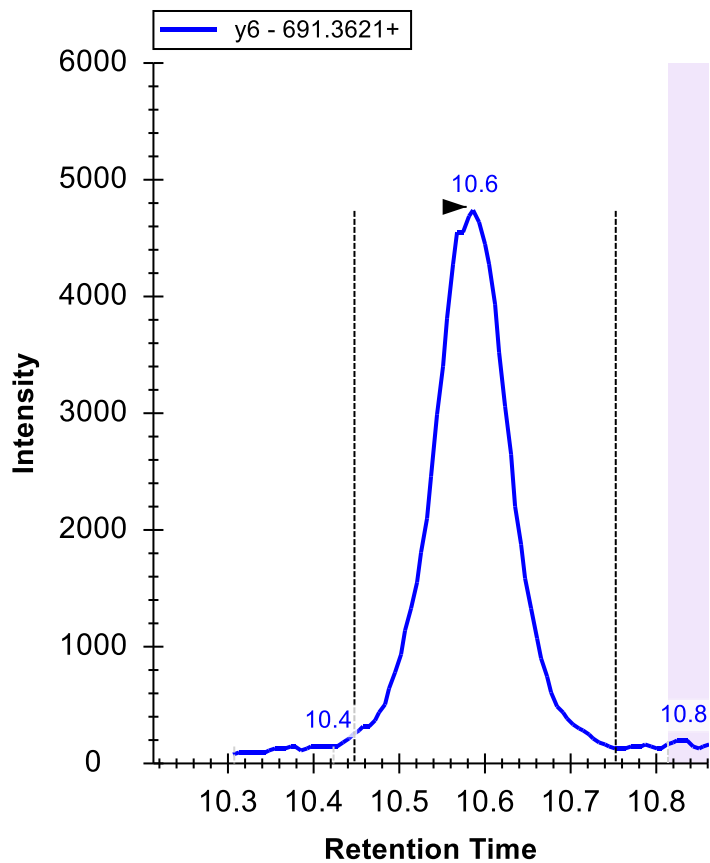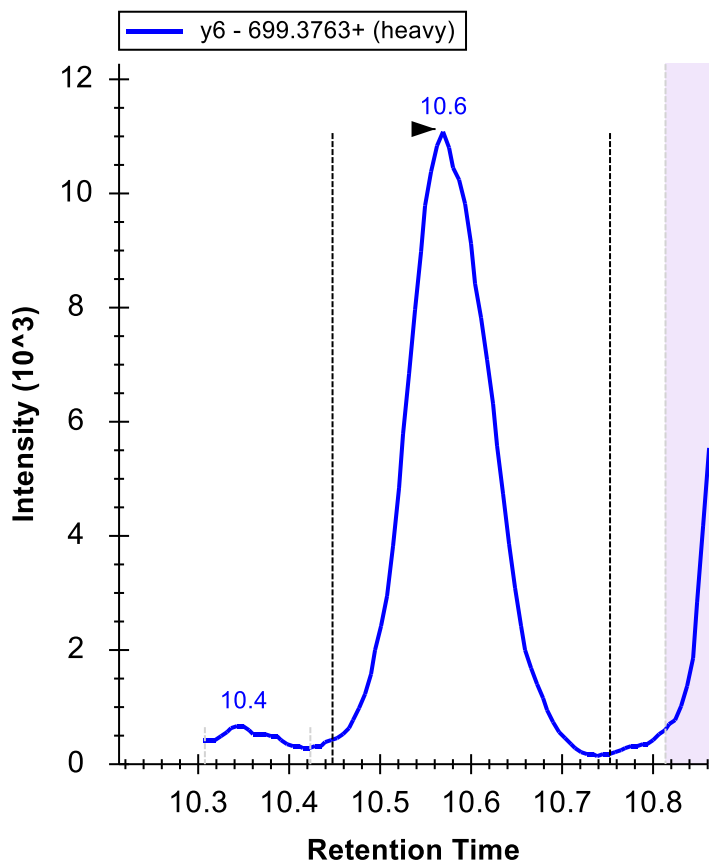

Supplementary Figure 5a: Spectrum 1433E



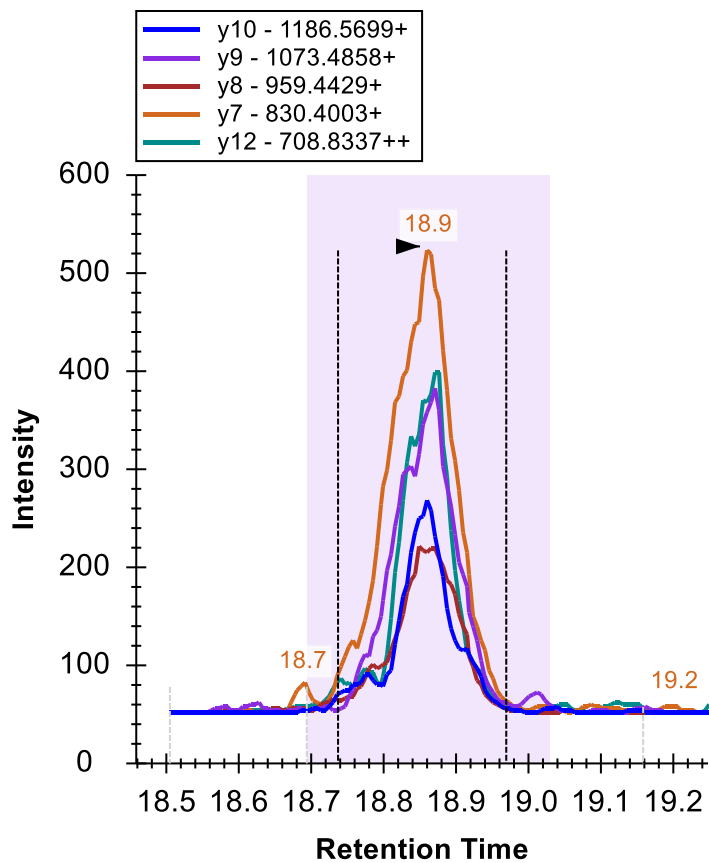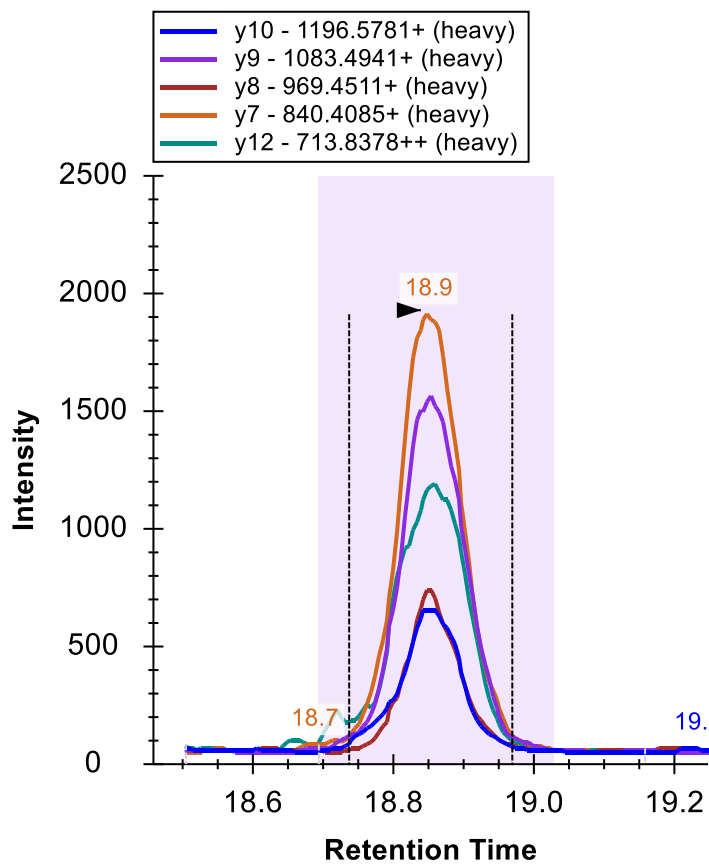

Supplementary Figure 5b: Spectrum 1433F

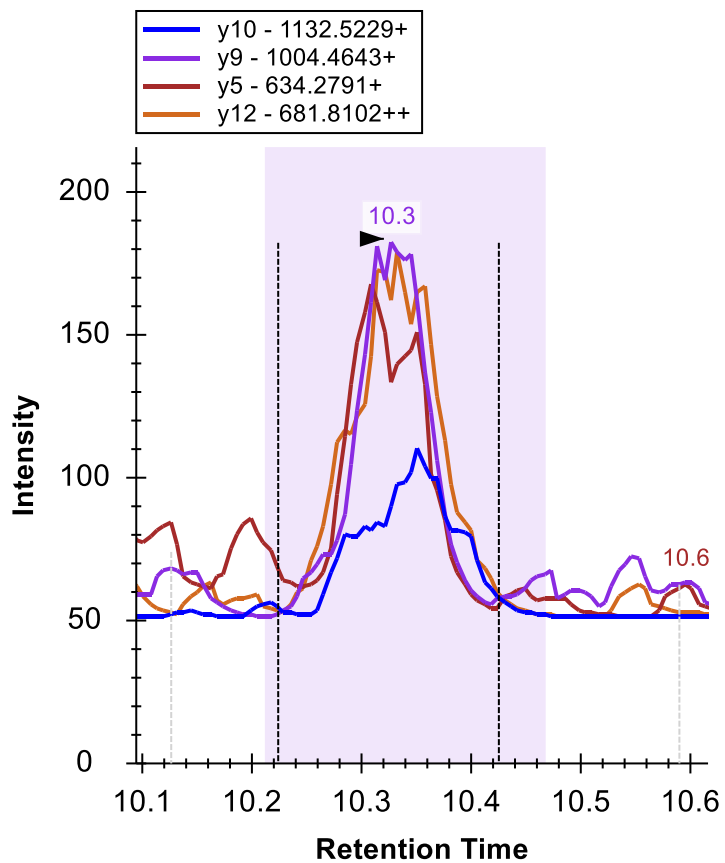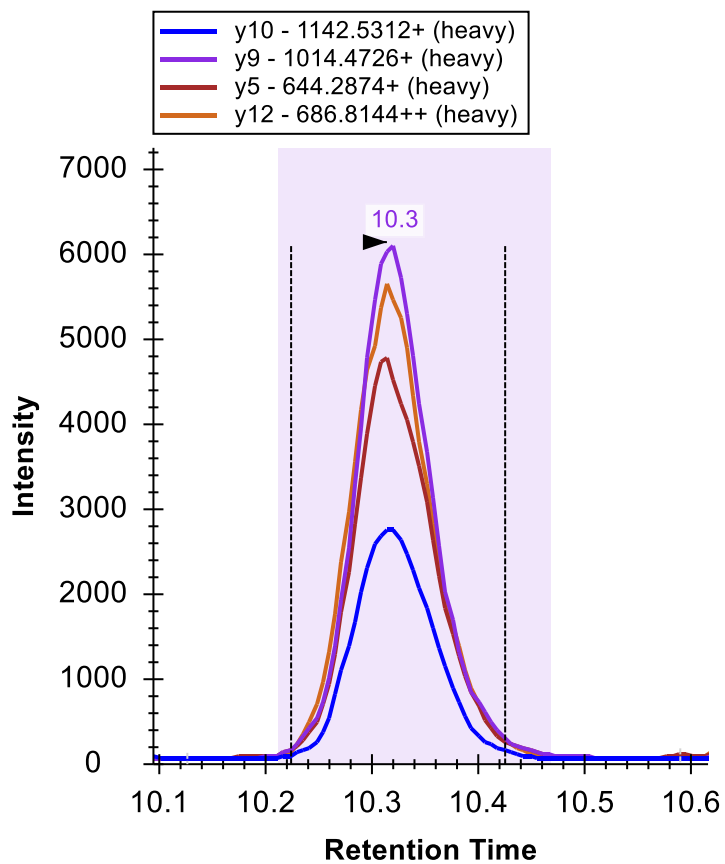

Supplementary Figure 5c: Spectrum 1433T

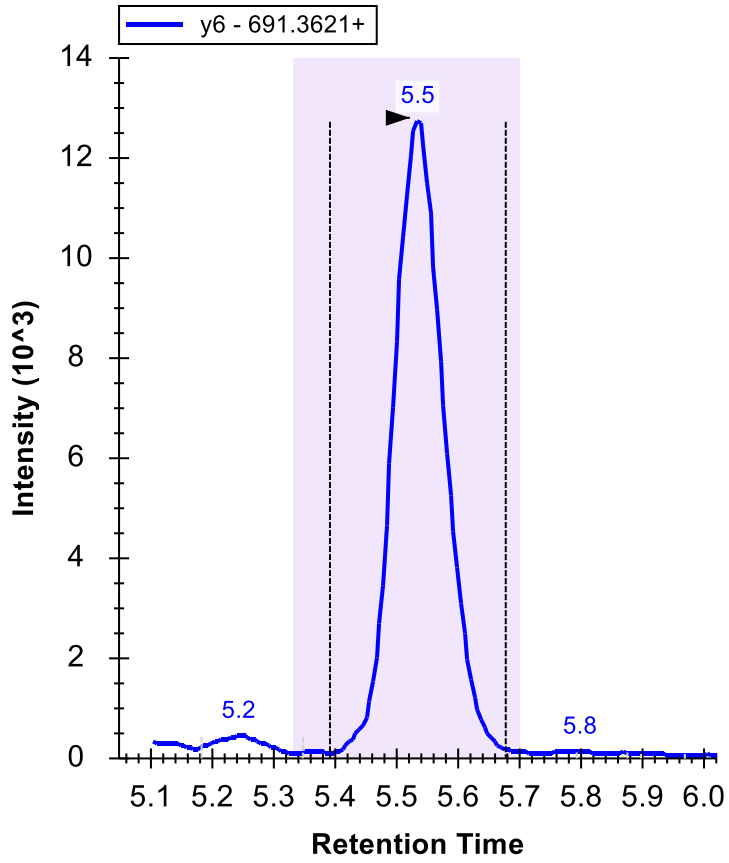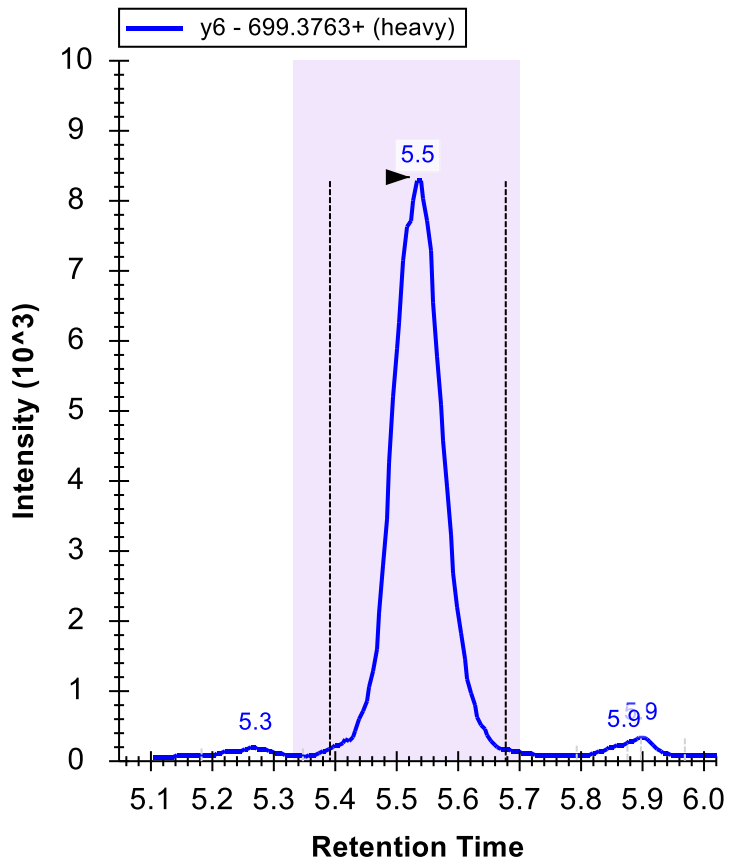

Supplementary Figure 5d: Spectrum 1433Z

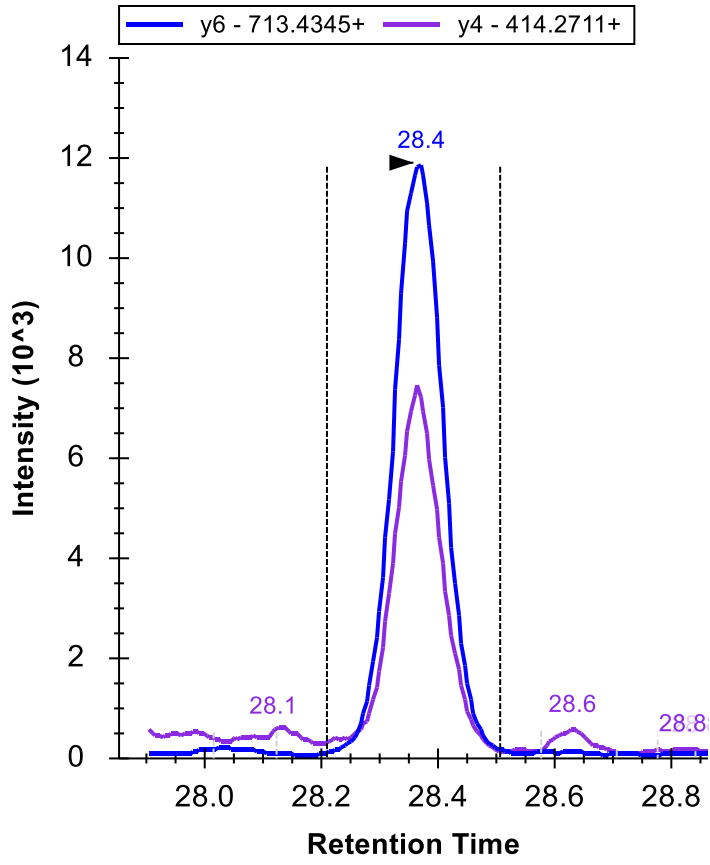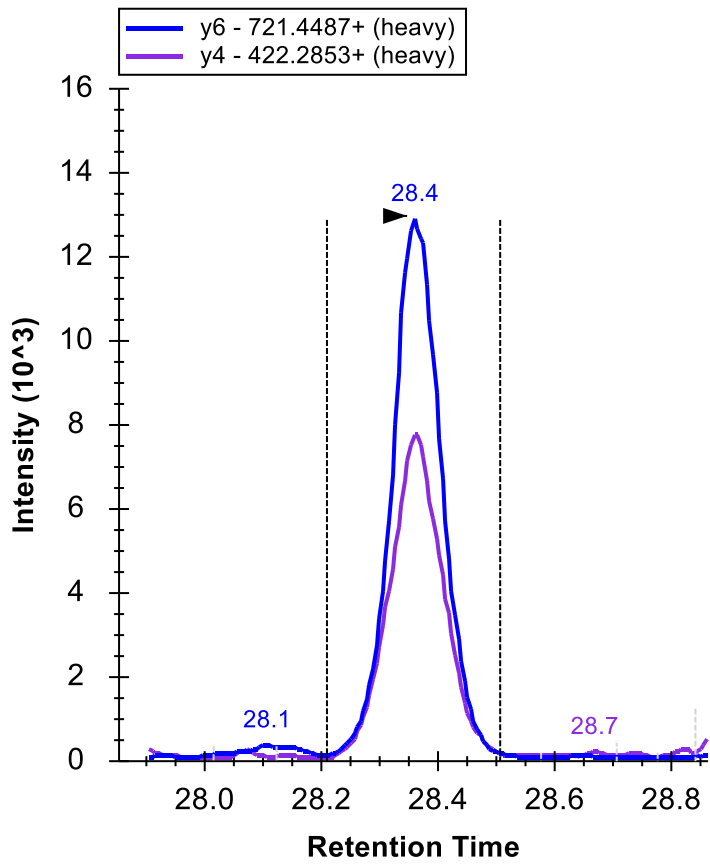

Supplementary Figure 5d: Spectrum AP2B1\_AVW

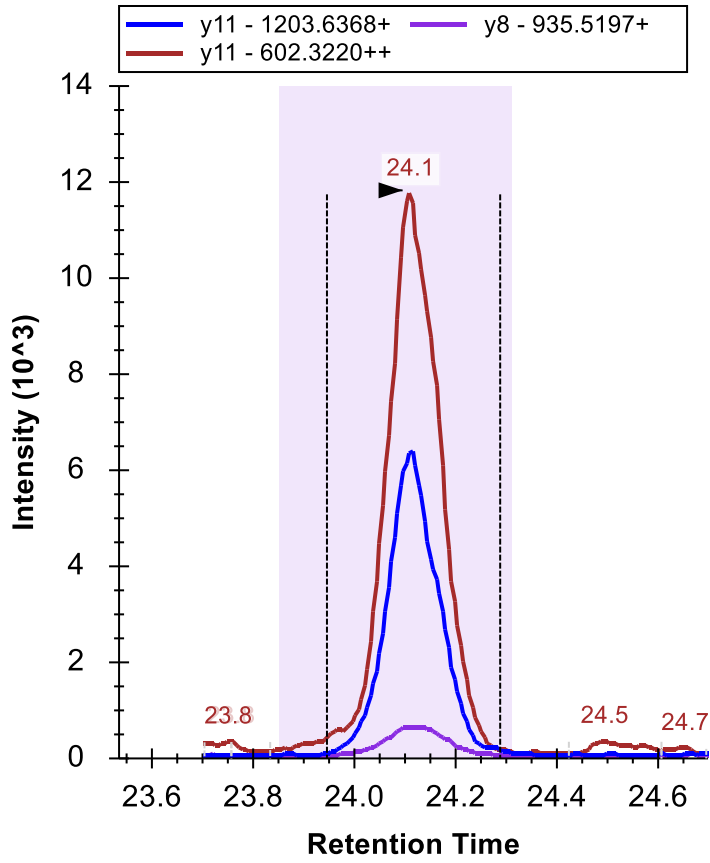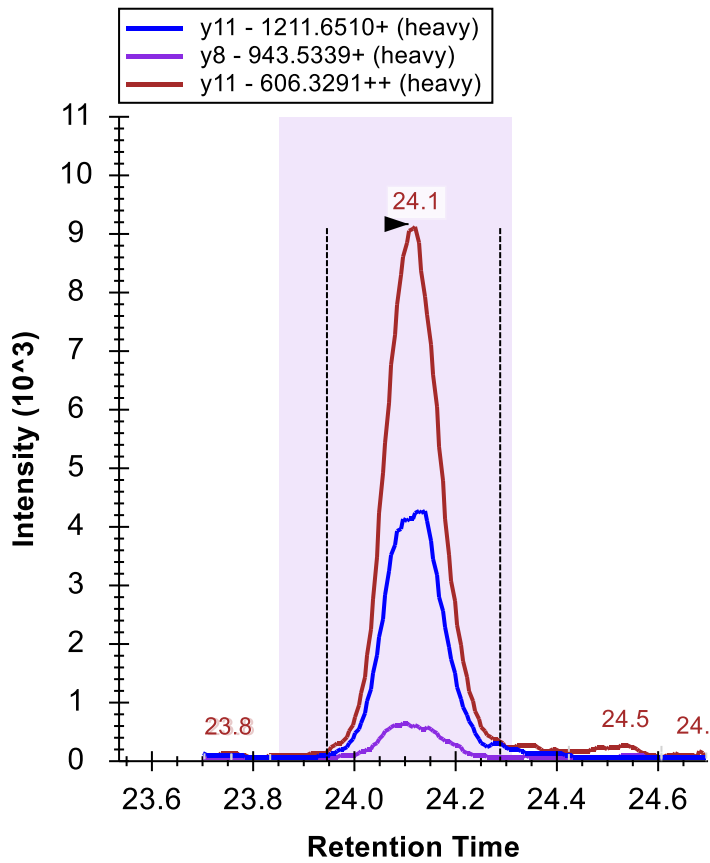

Supplementary Figure 5e: Spectrum AP2B1\_IQPG

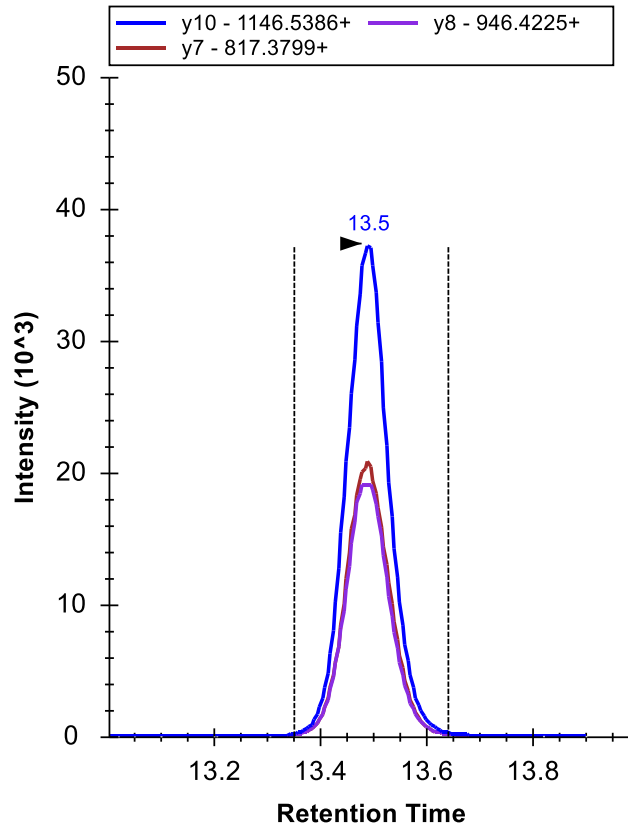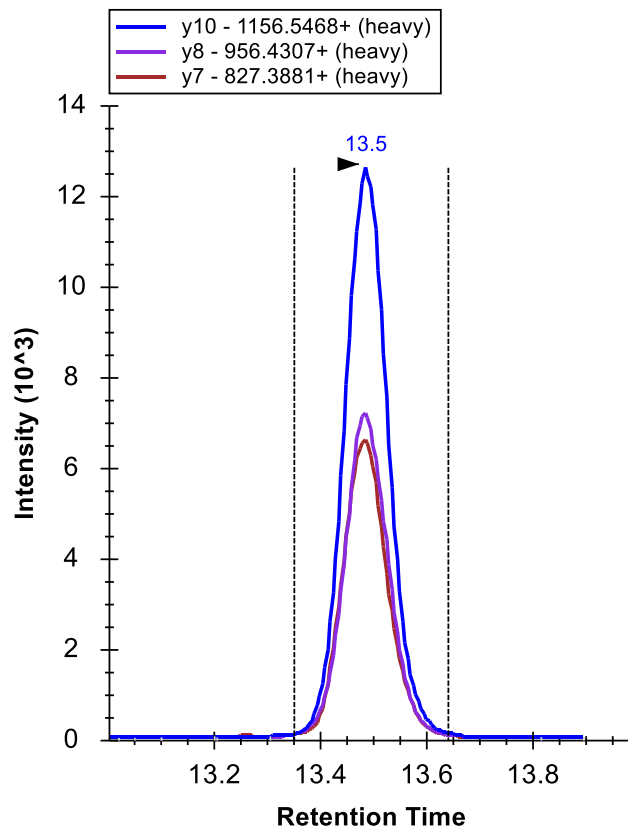

Supplementary Figure 5f: Spectrum APP

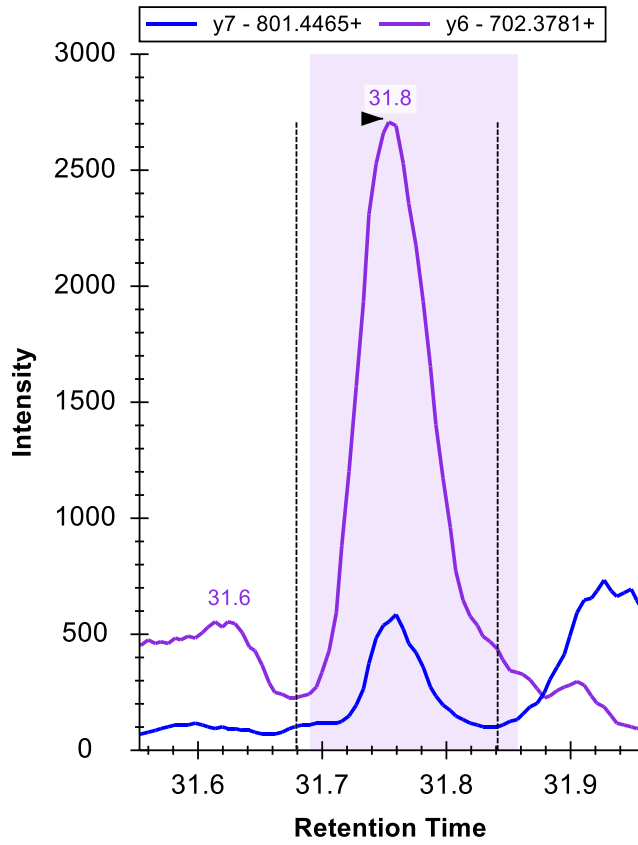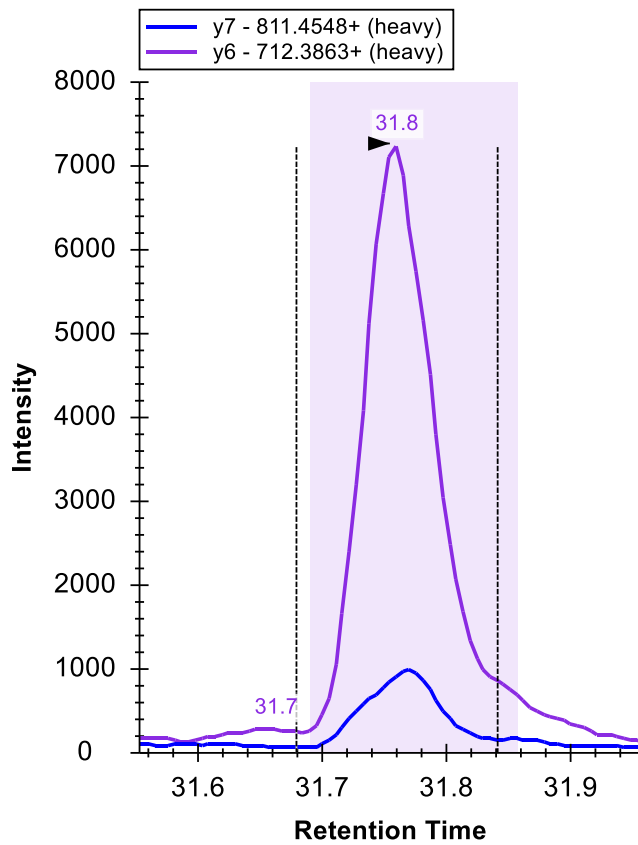

Supplementary Figure 5g: Spectrum CAT F

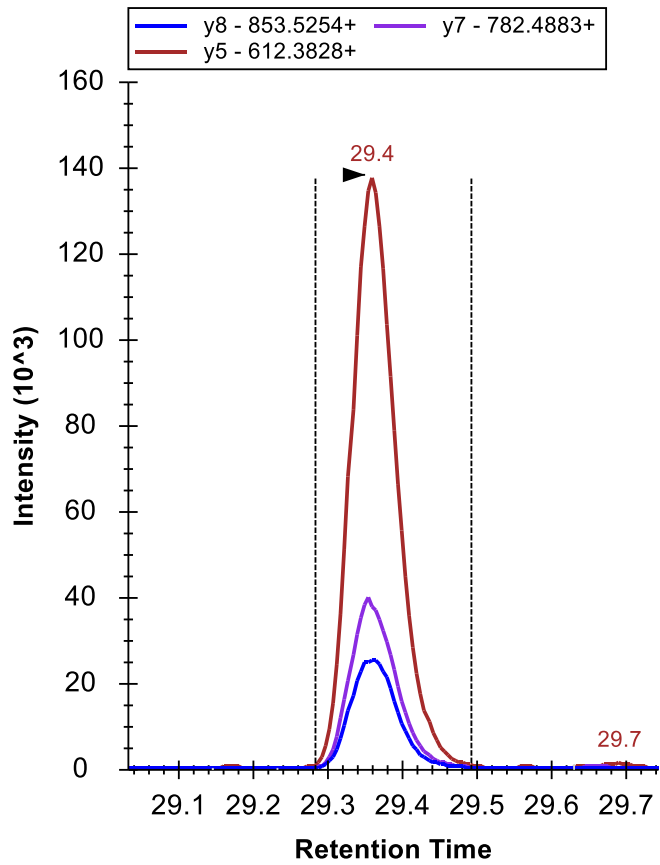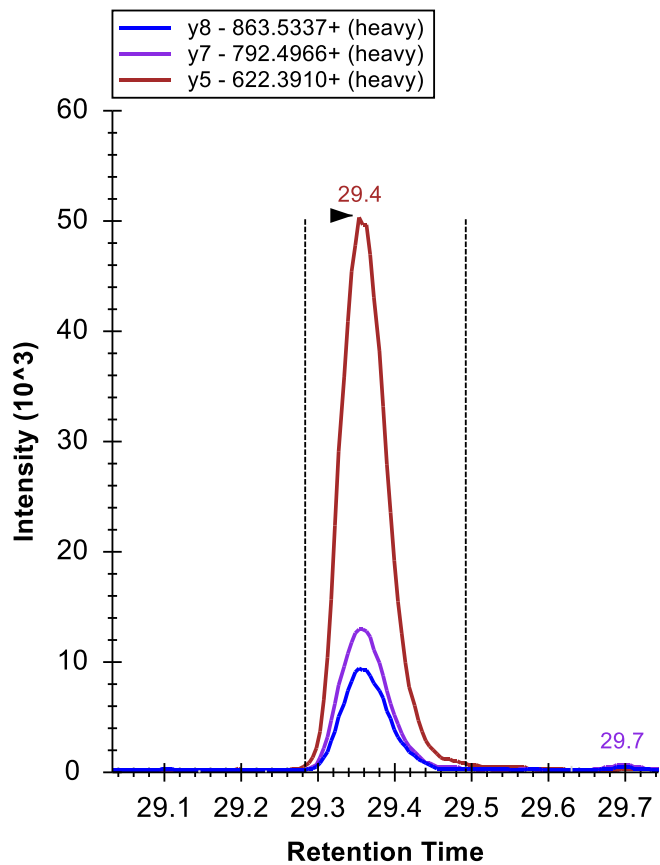

Supplementary Figure 5h: Spectrum CHMGA\_EDSL



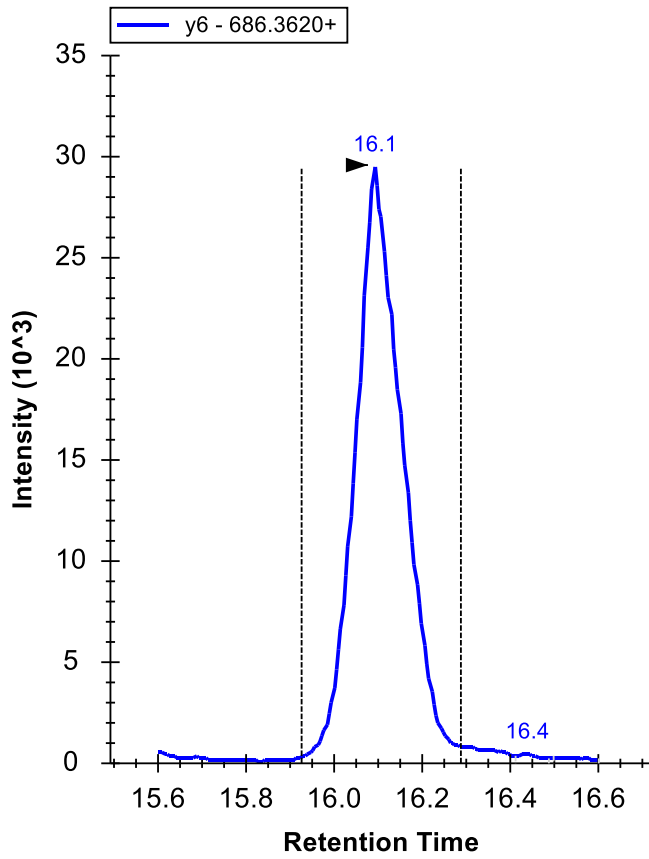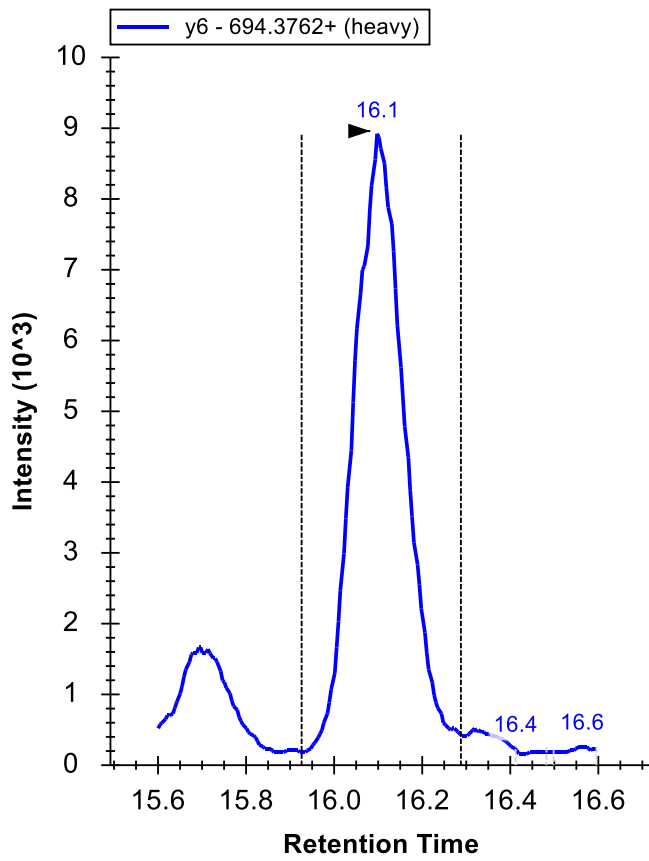

Supplementary Figure 5i: Spectrum CHMGA\_GLAS

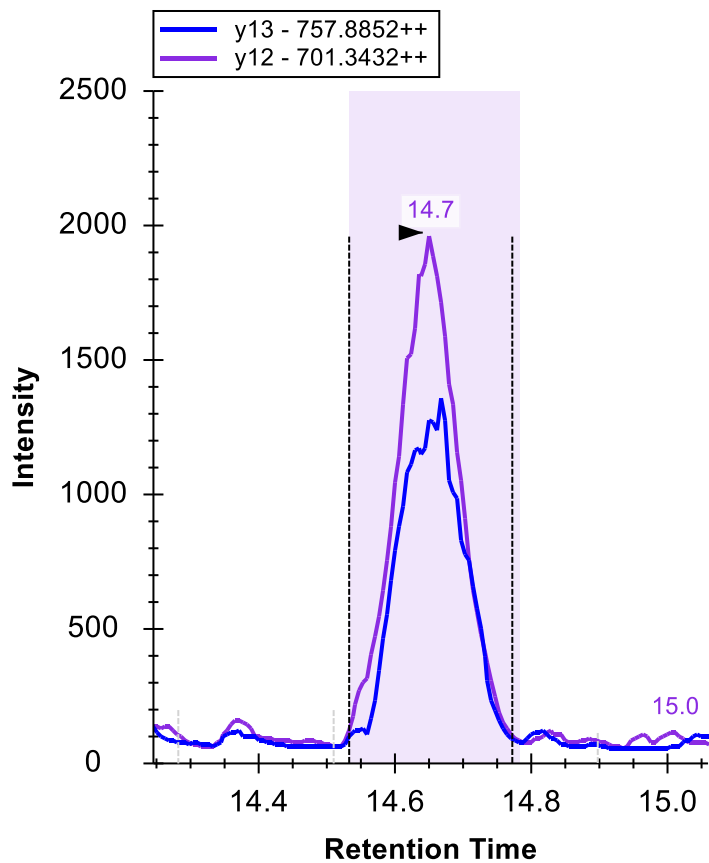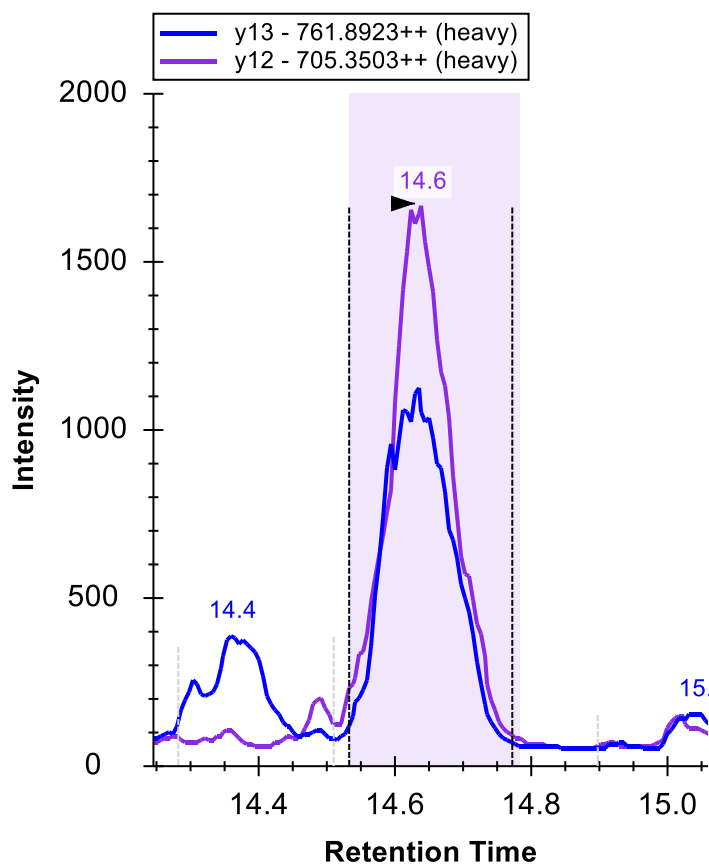

Supplementary Figure 5j: Spectrum CPLX2

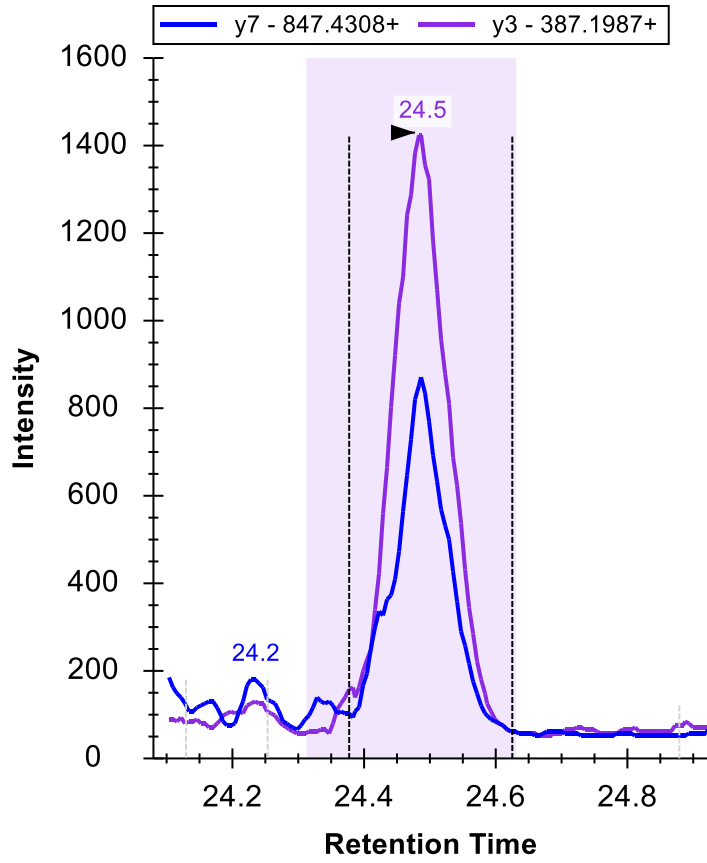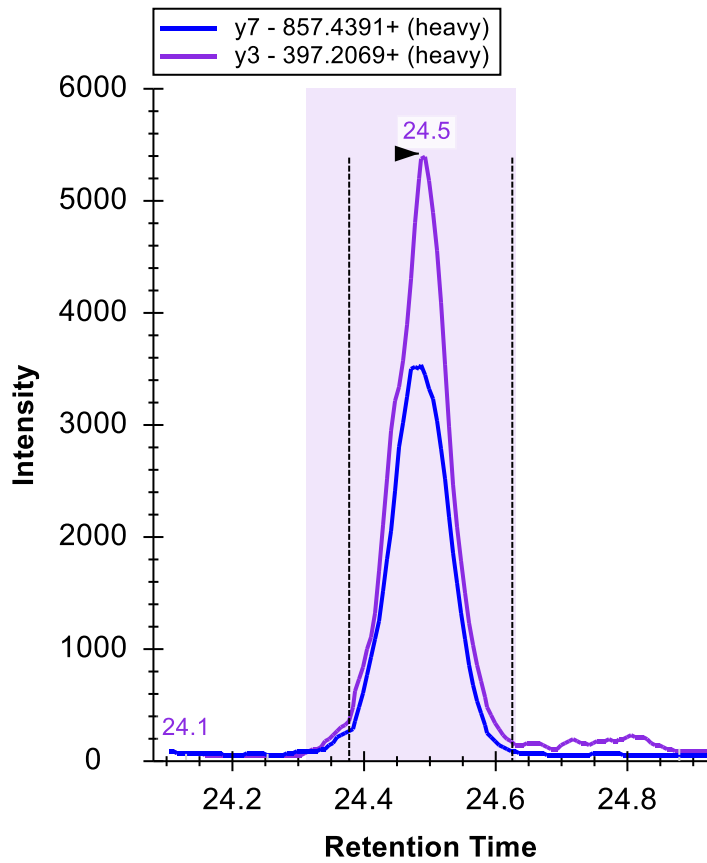

Supplementary Figure 5k: Spectrum GDIA

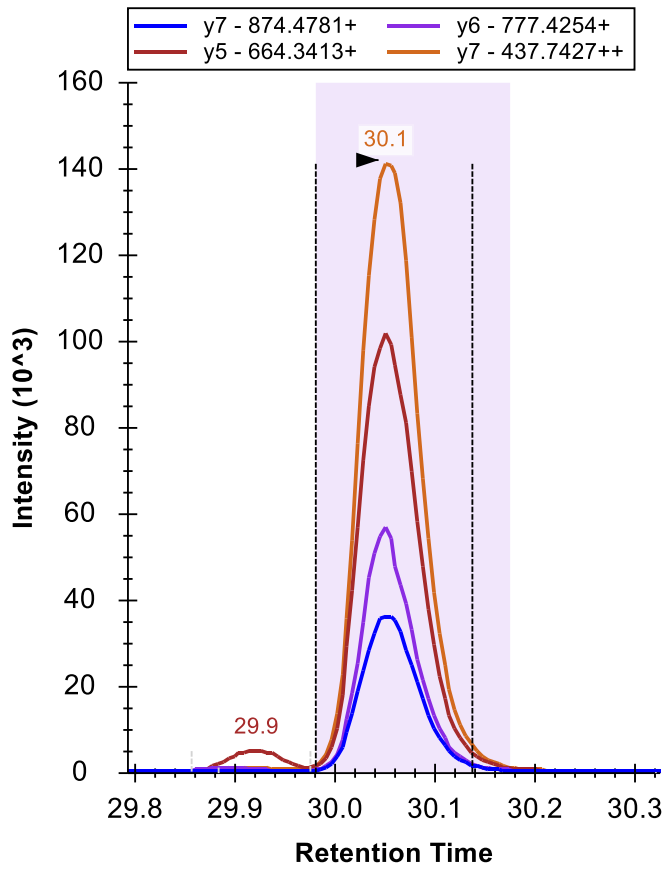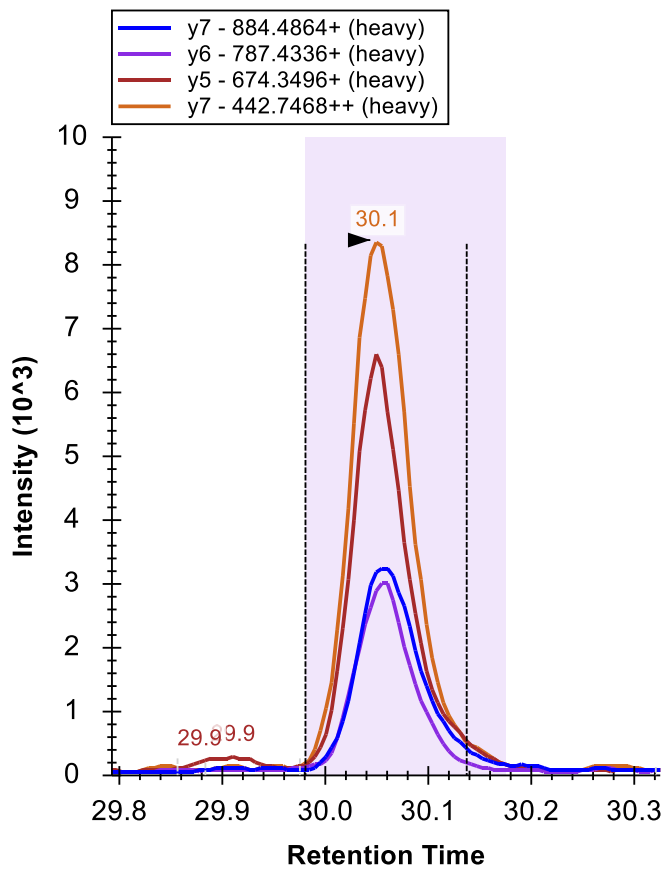

Supplementary Figure 5I: Spectrum LAMP2\_IPL

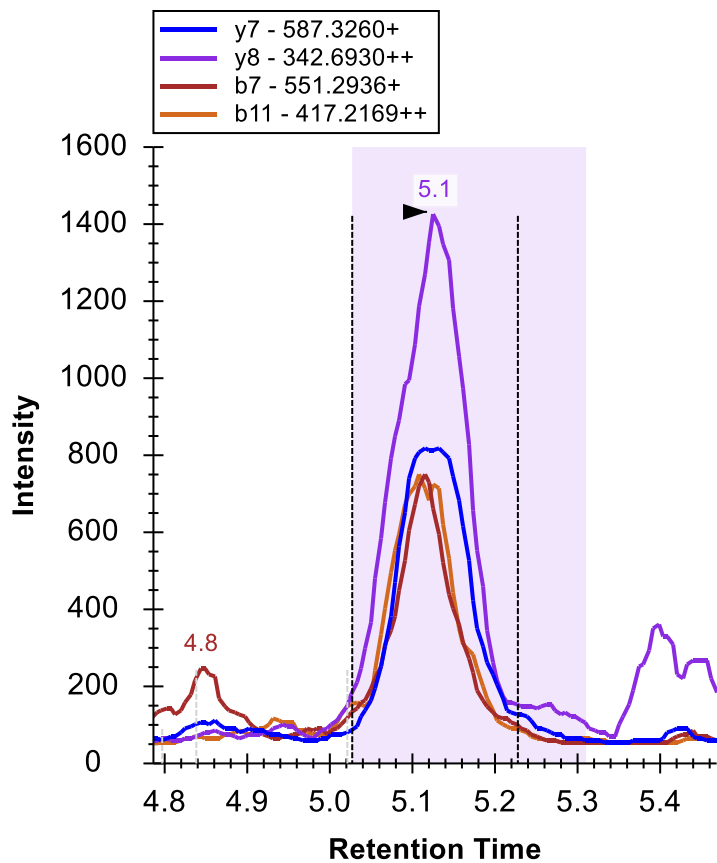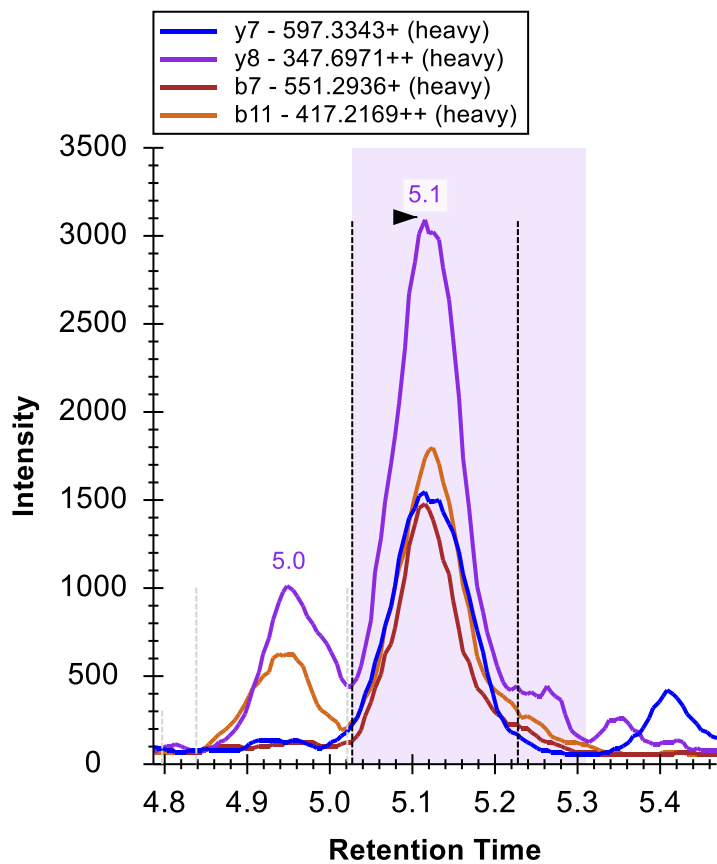

Supplementary Figure 5m: Spectrum NEUR

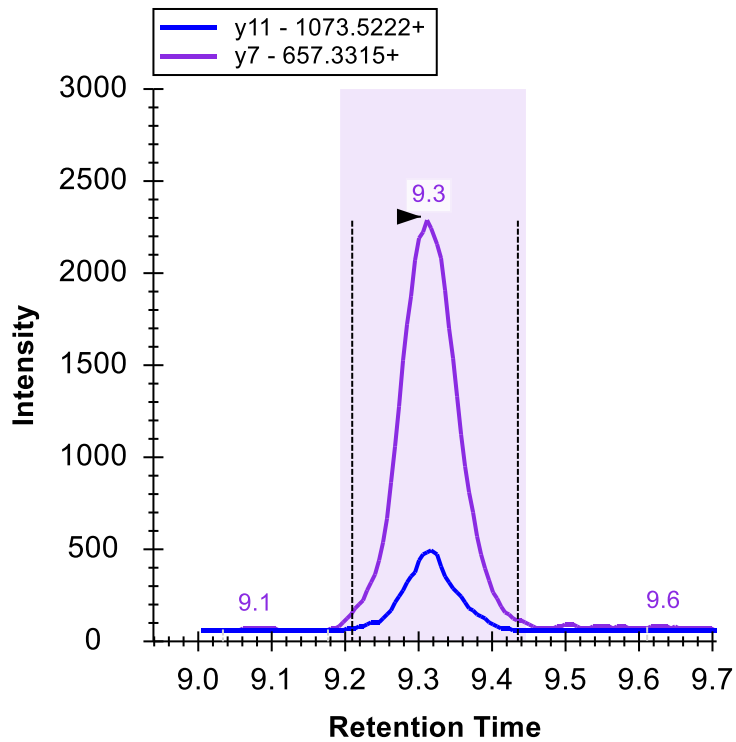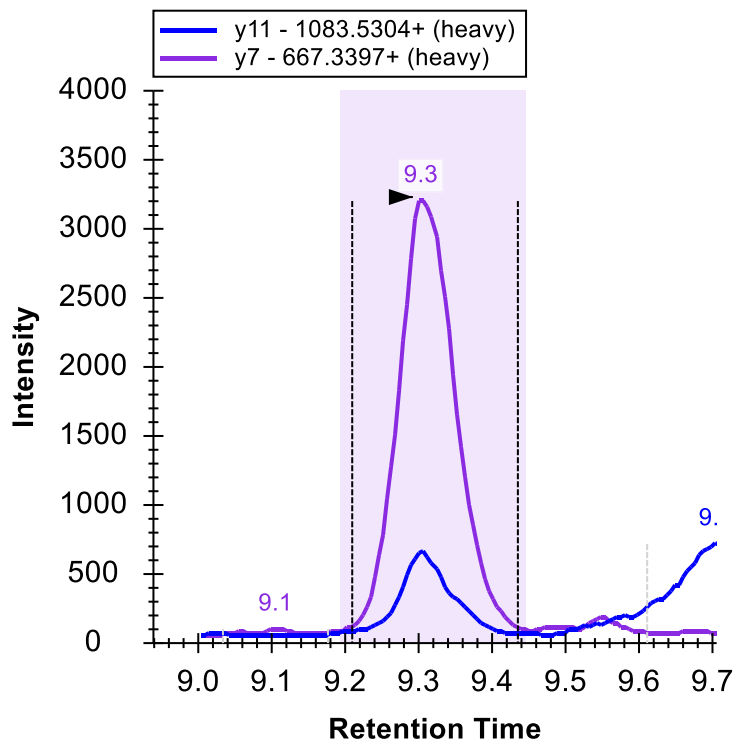

Supplementary Figure 5n: Spectrum NPTX1\_CES

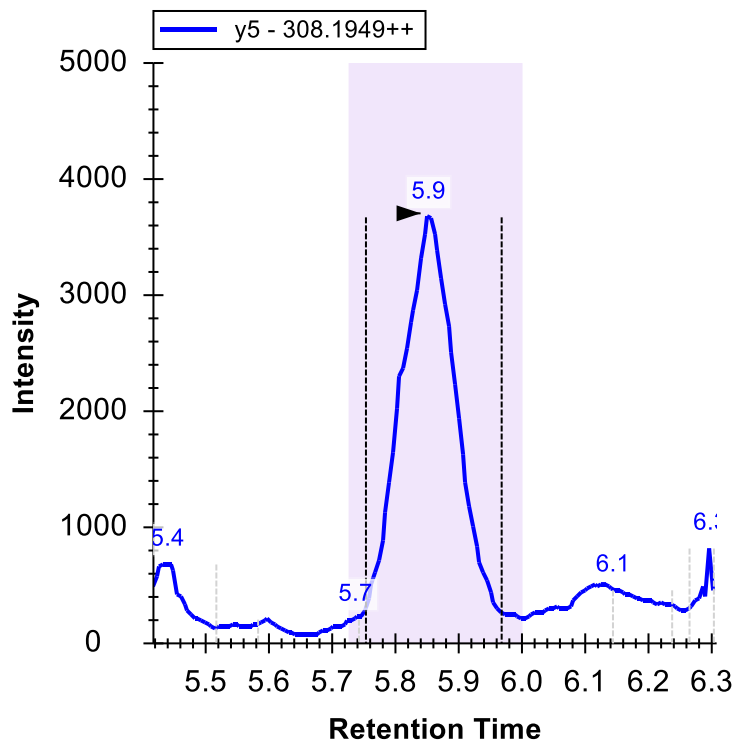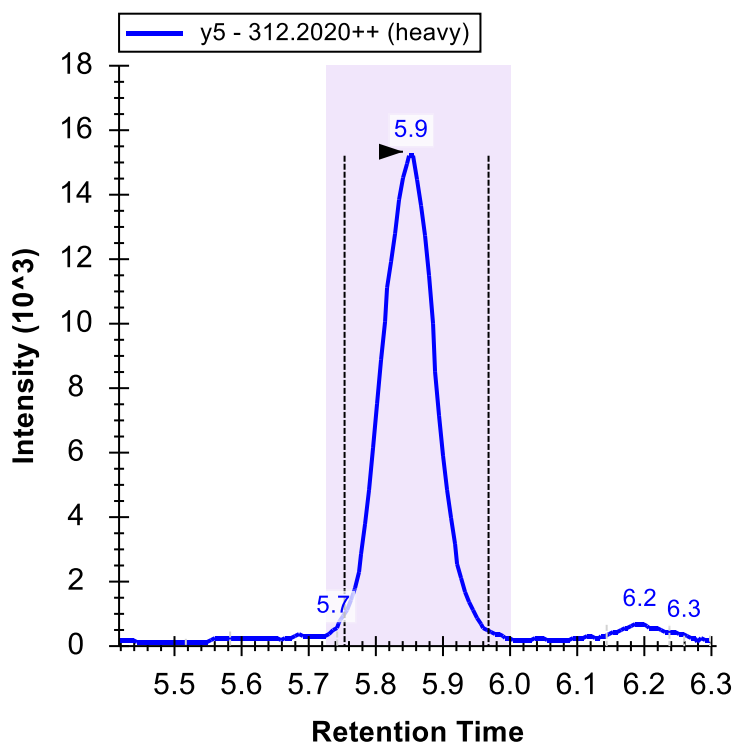

Supplementary Figure 5o: Spectrum NPTX1

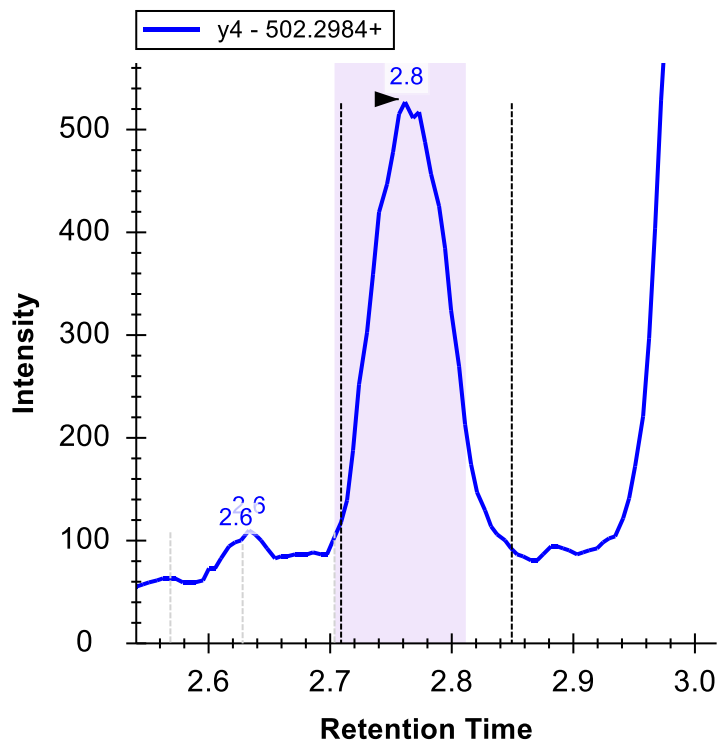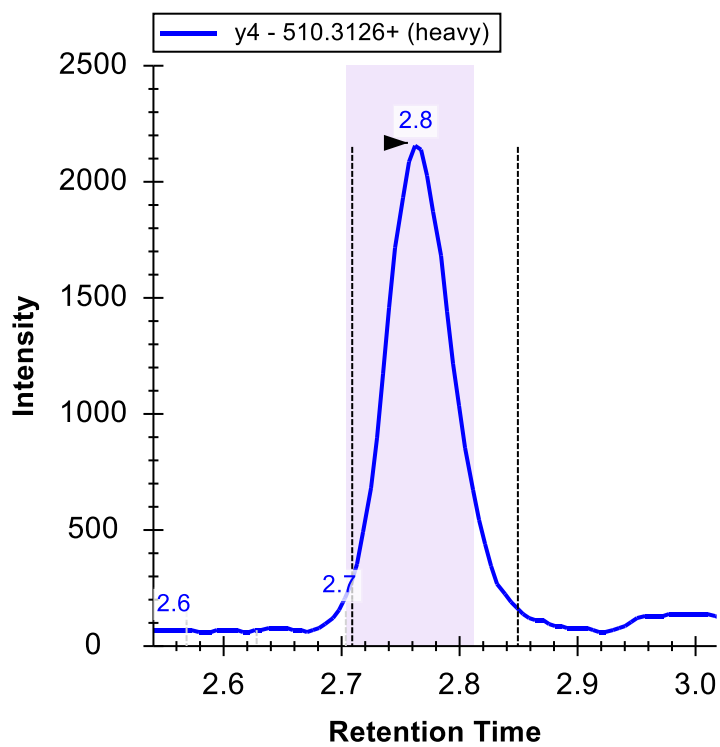

Supplementary Figure 5p: Spectrum NPTX2\_ETVV



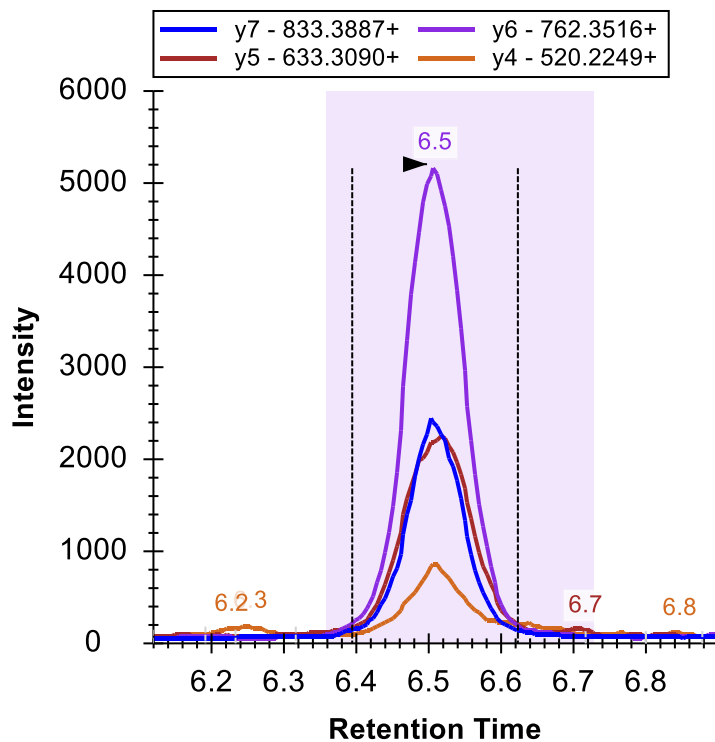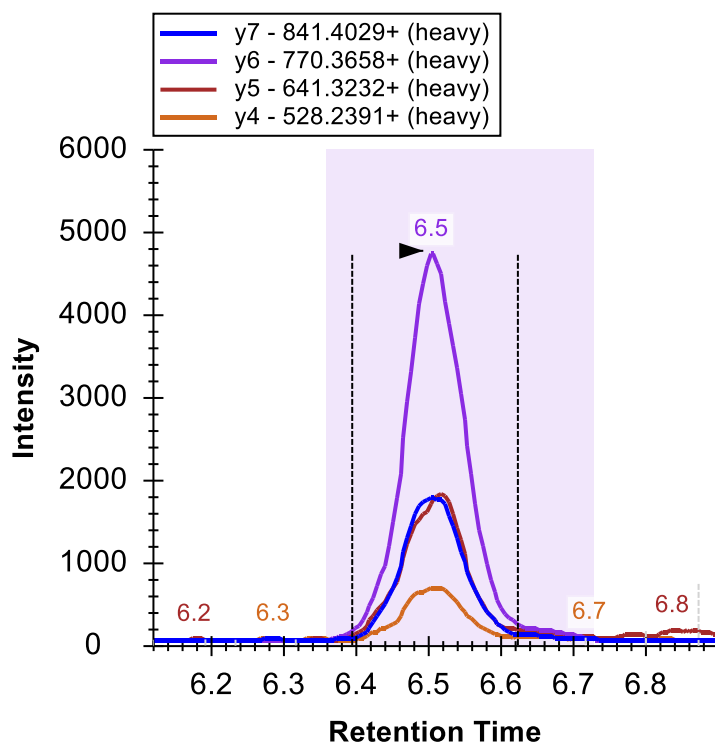

Supplementary Figure 5q: Spectrum NPTX2\_VAEL

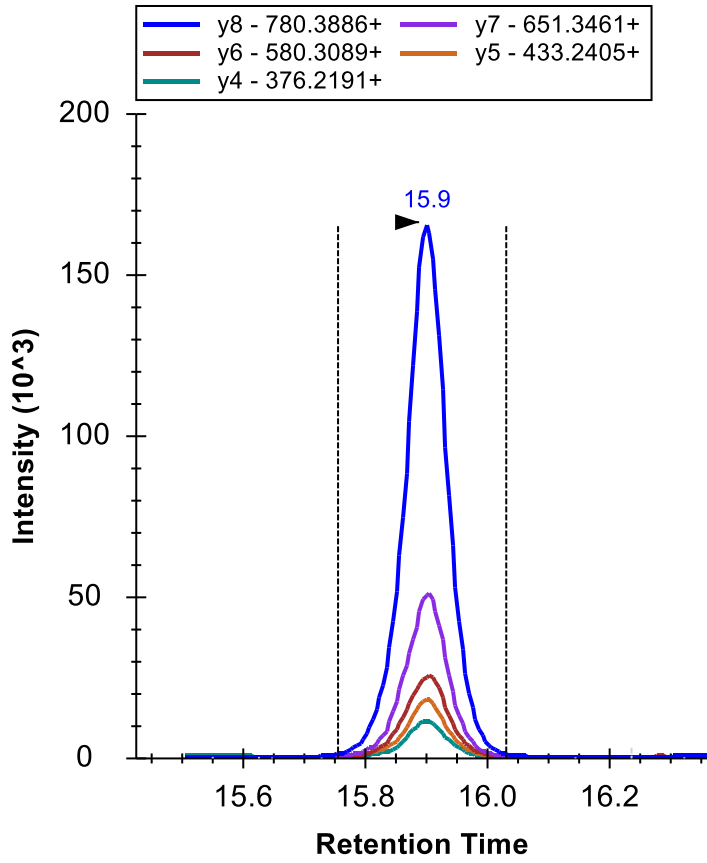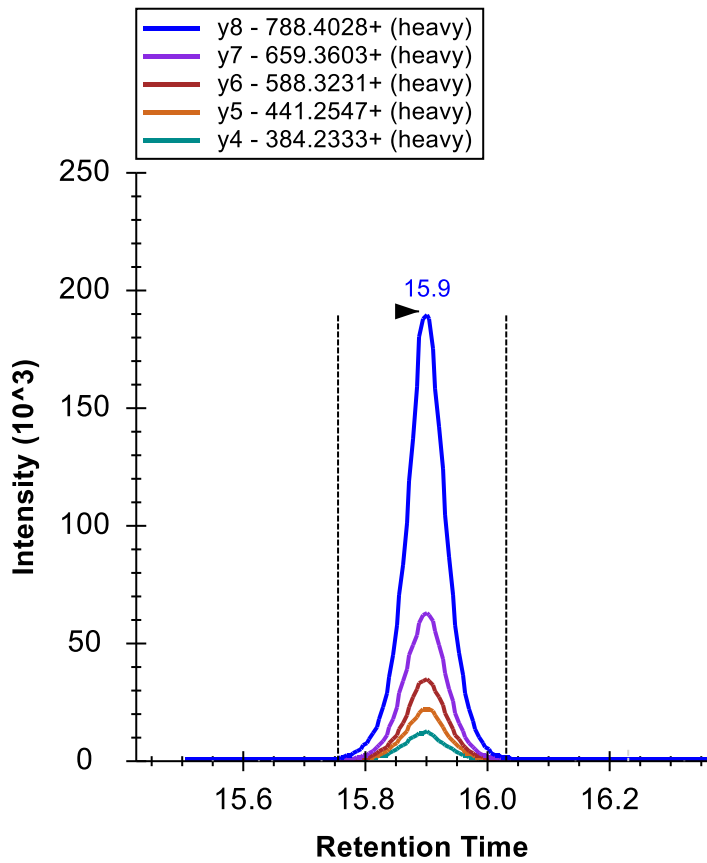

Supplementary Figure 5r: Spectrum NPTXR\_LVEA

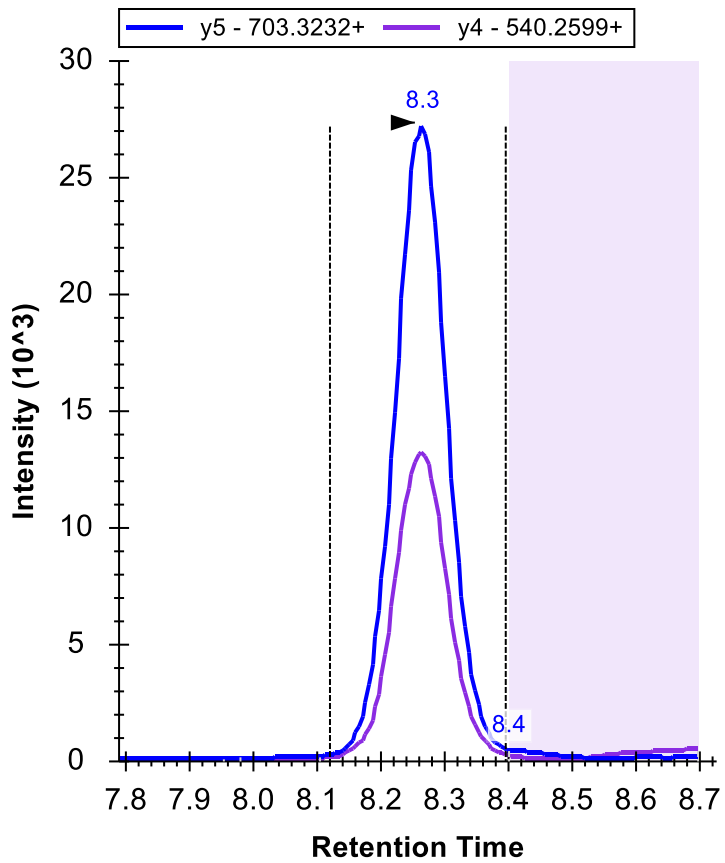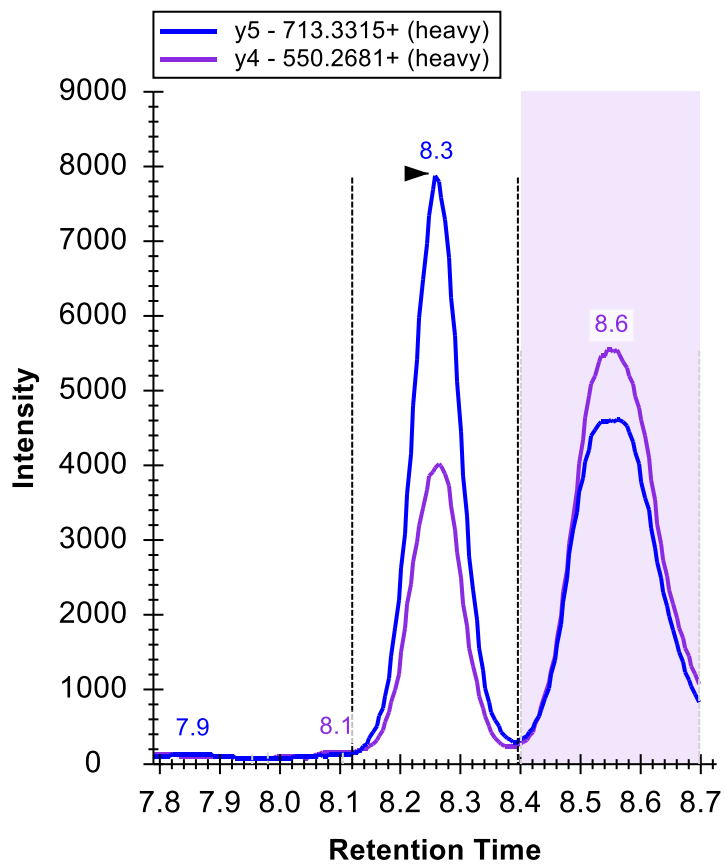

Supplementary Figure 5s: Spectrum NPTXR\_NNY

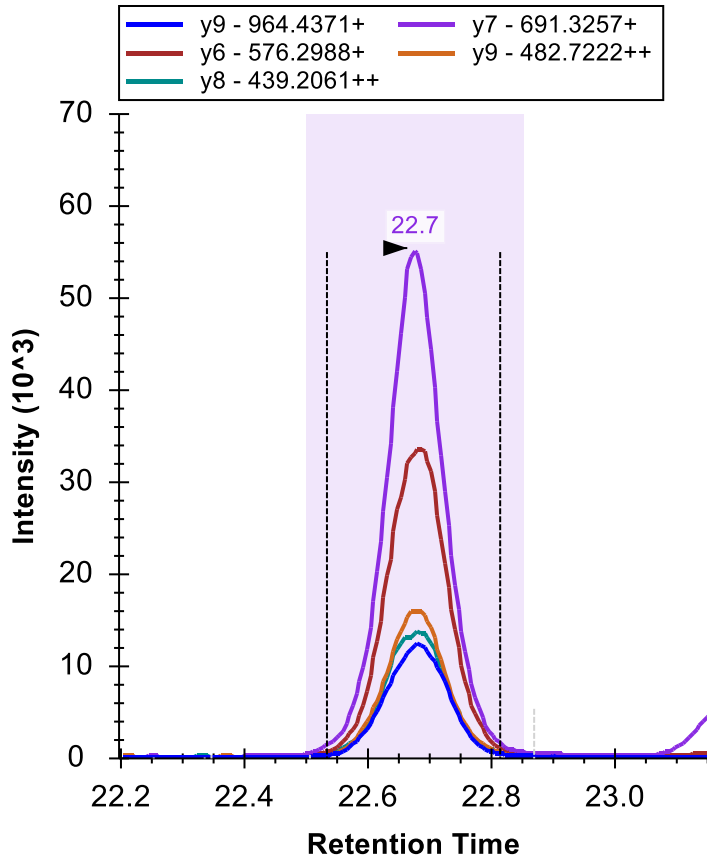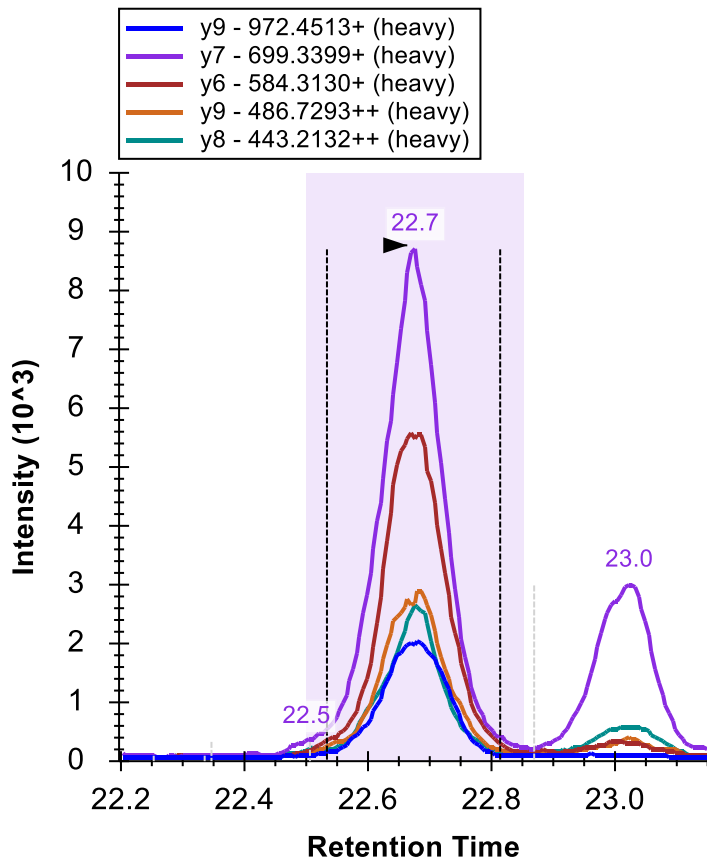

Supplementary Figure 5t: Spectrum PEBP1\_LYE



Supplementary Figure 5u: PEBP1\_NRPT

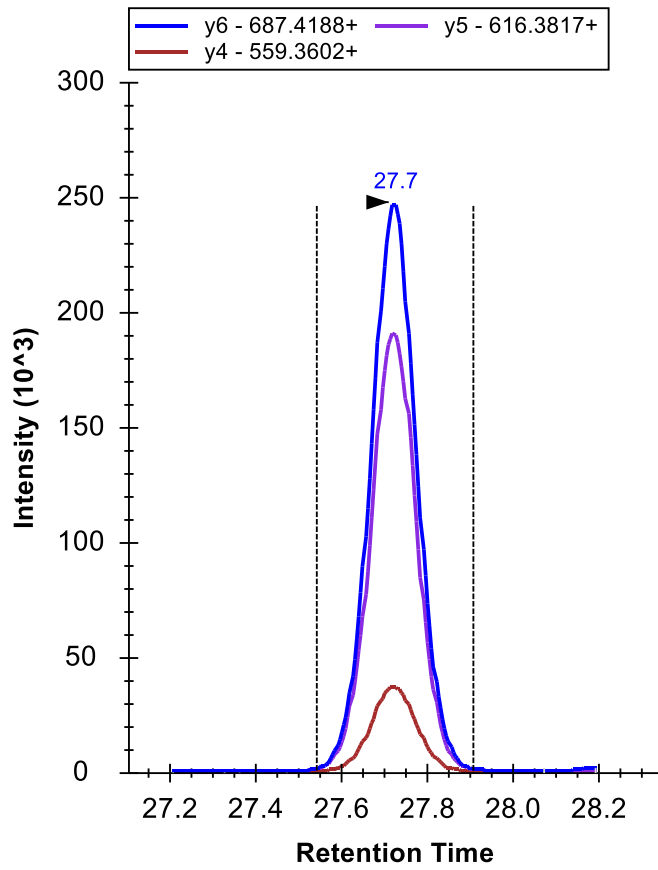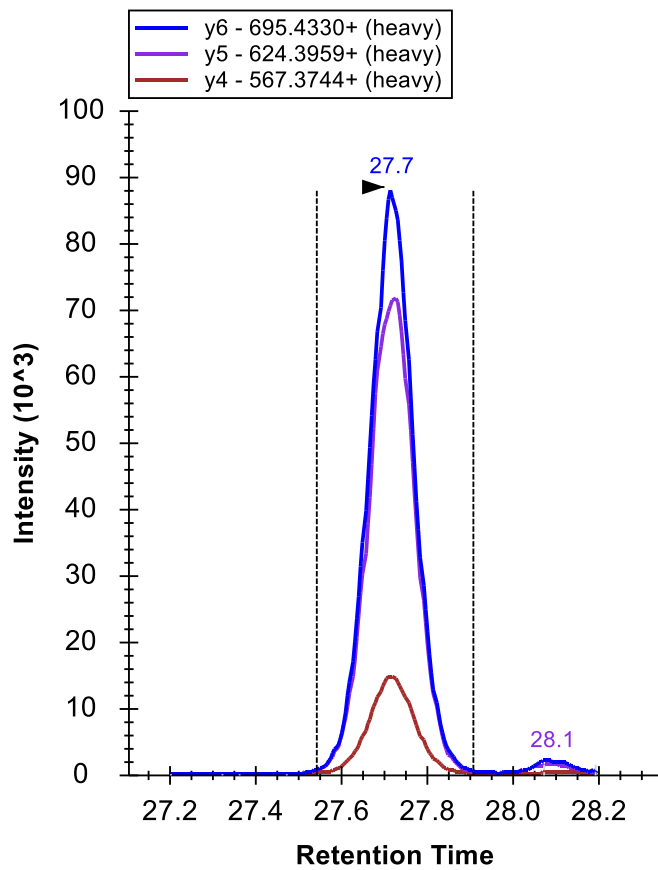

Supplementary Figure 5v: Spectrum SAP3\_EVA

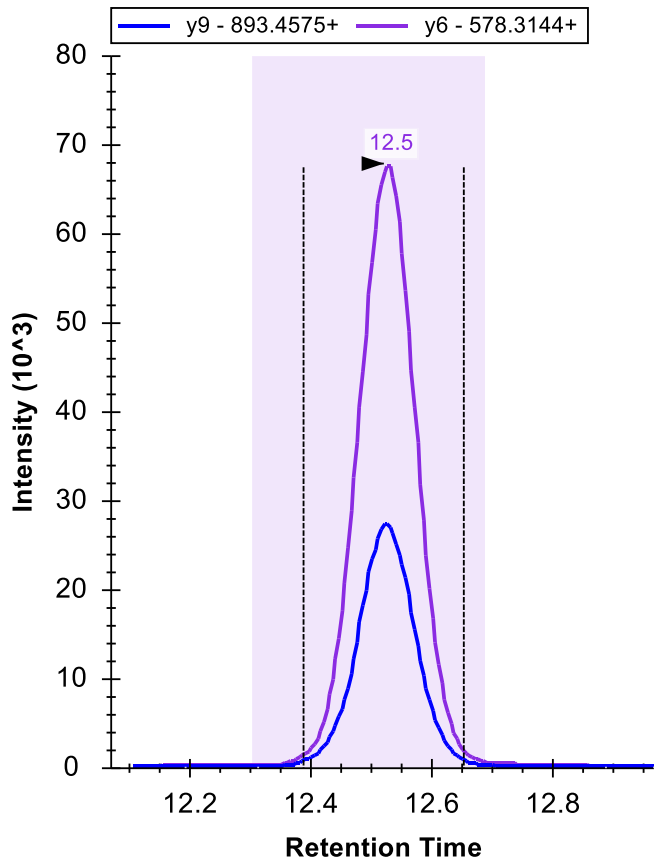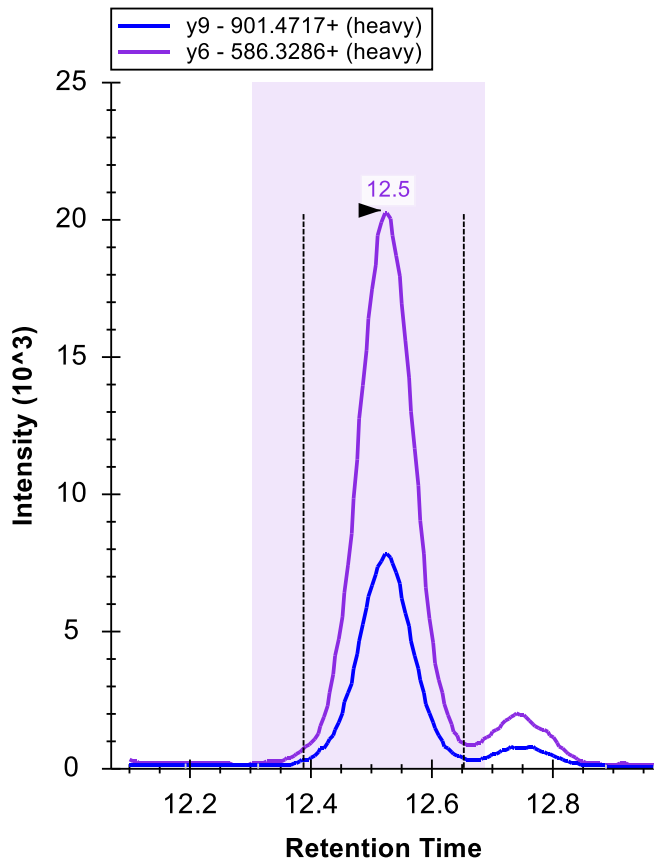

Supplementary Figure 5w: Spectrum SAP3\_IES

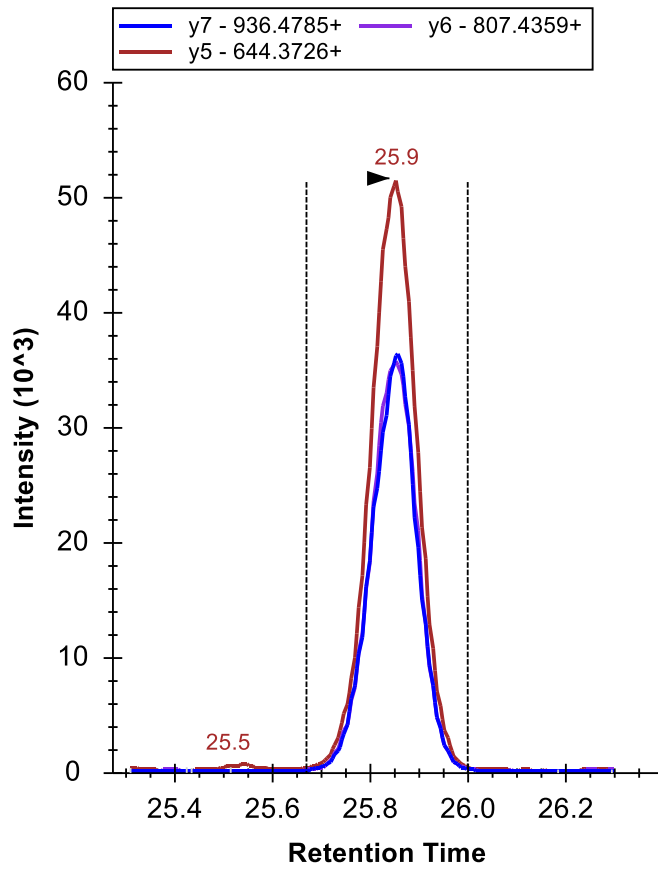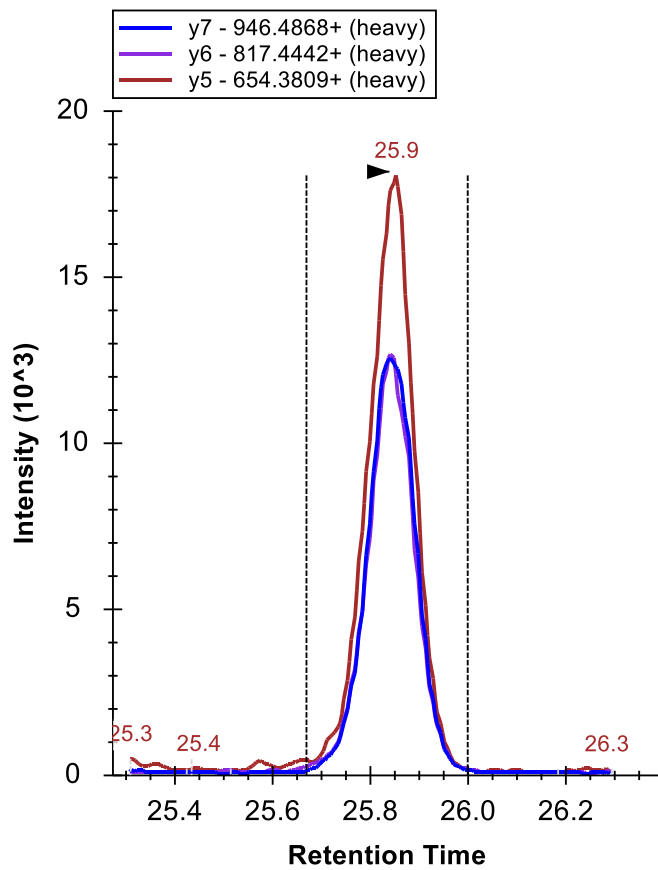

Supplementary Figure 5x: Spectrum SCG2\_ALE



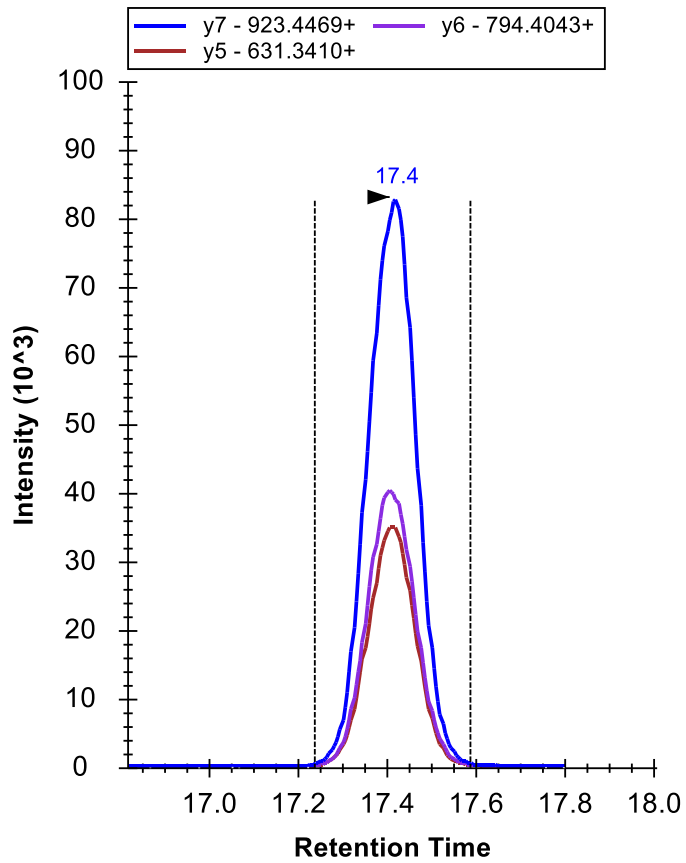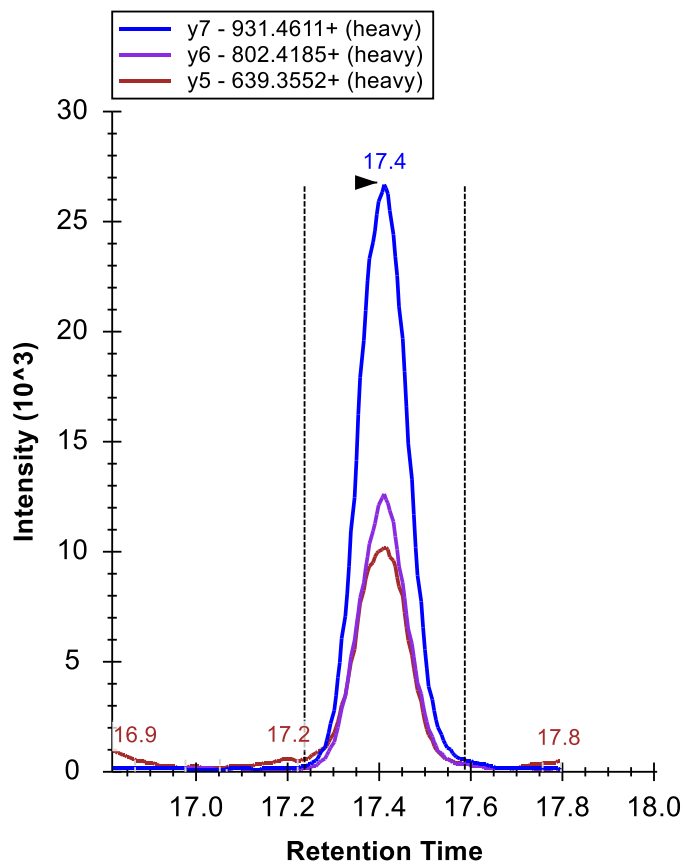

Supplementary Figure 5y: Spectrum SCG2\_VLE

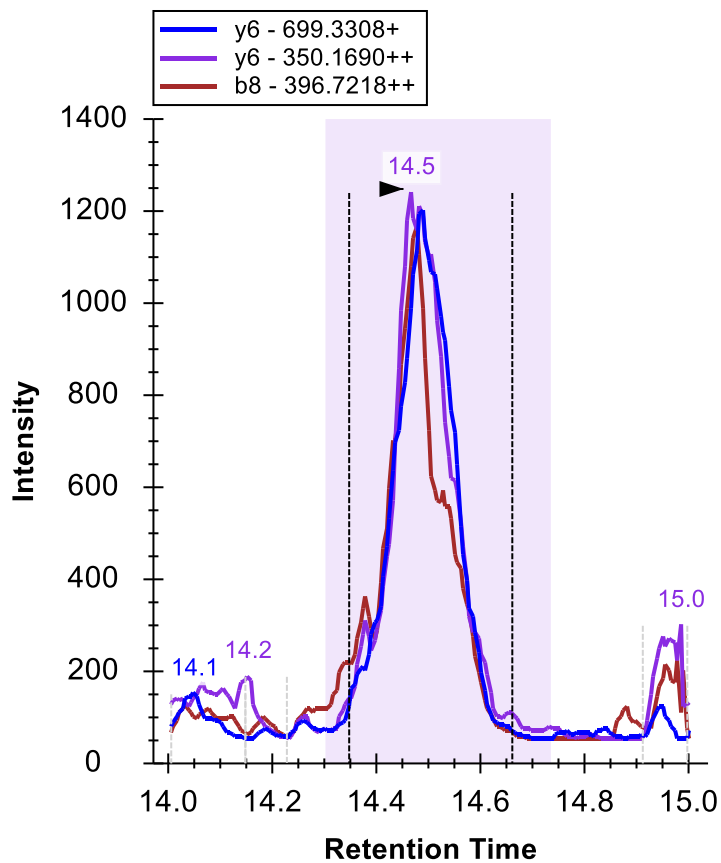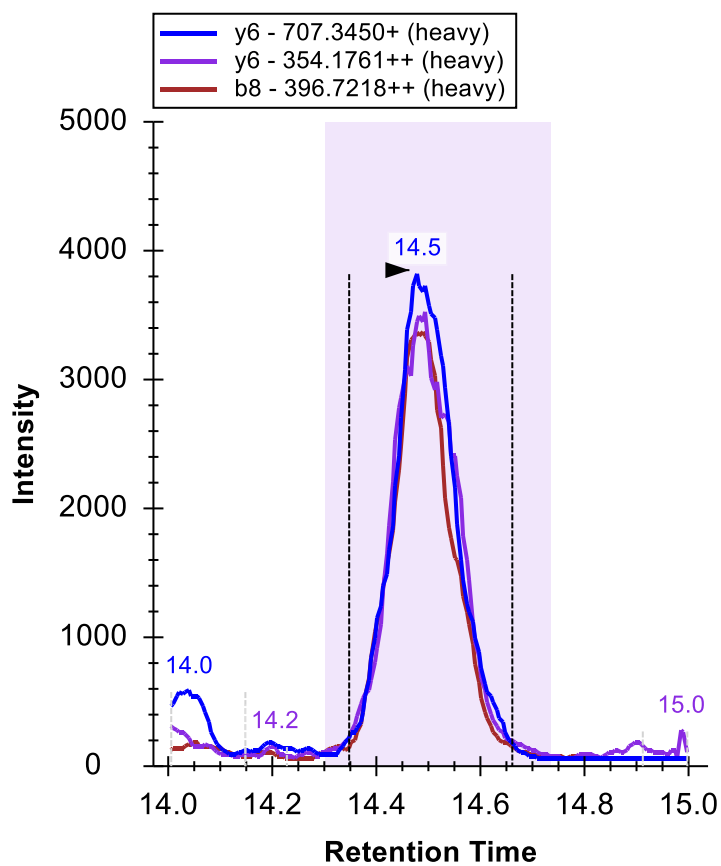

Supplementary Figure 5z: Spectrum STX1B

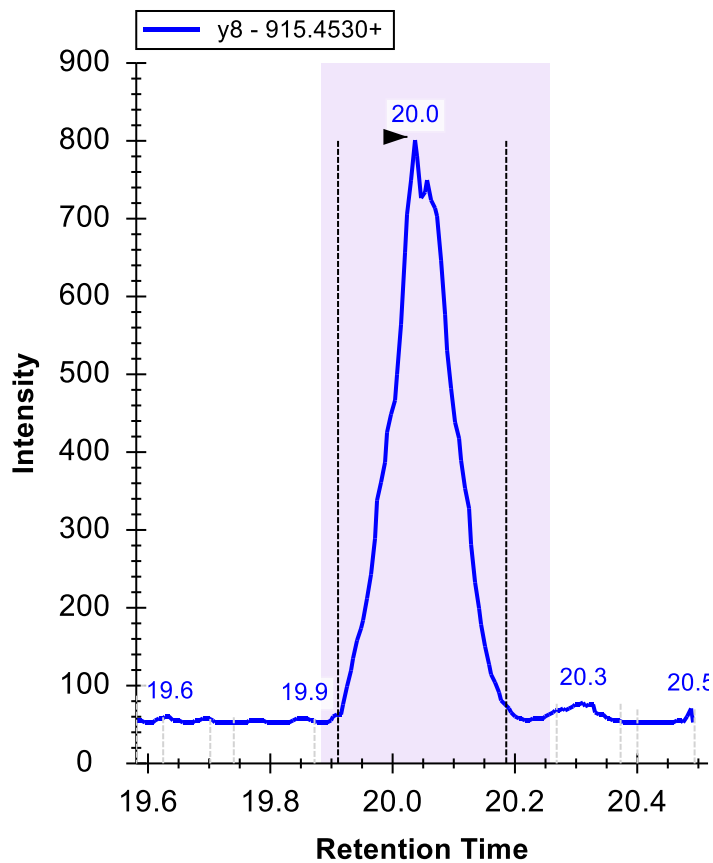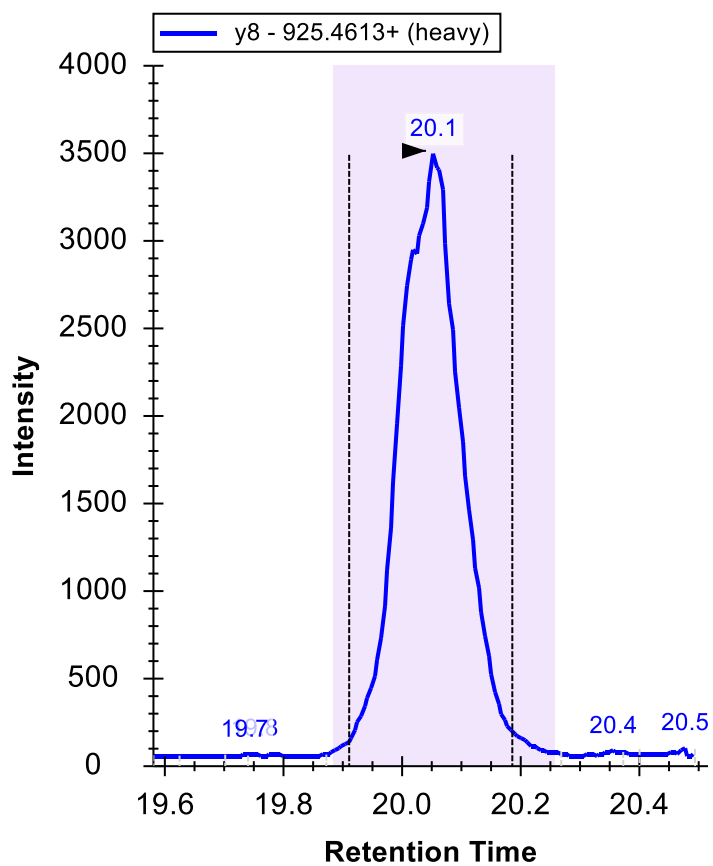

Supplementary Figure 5a1: Spectrum STX7

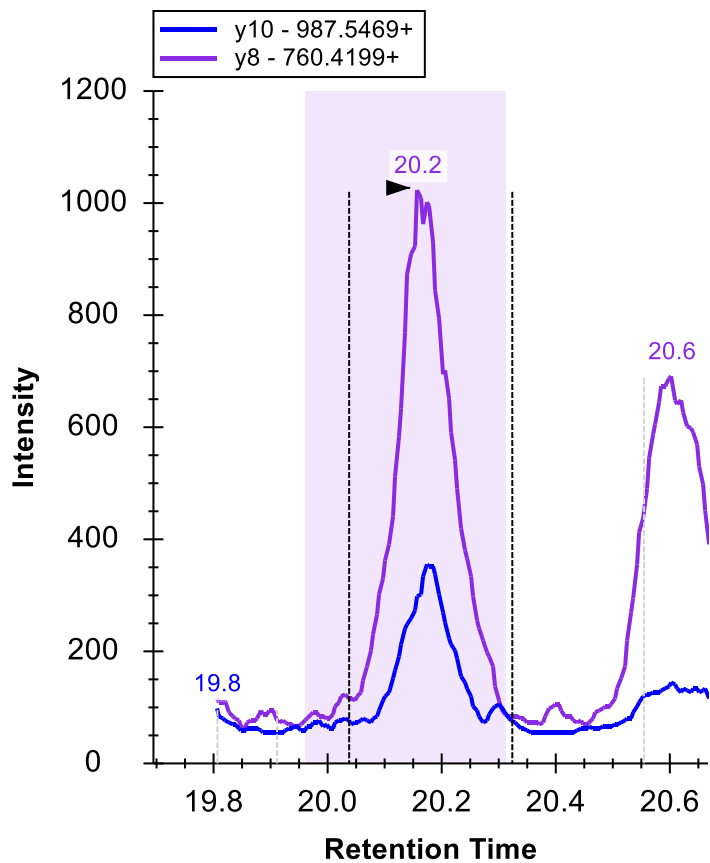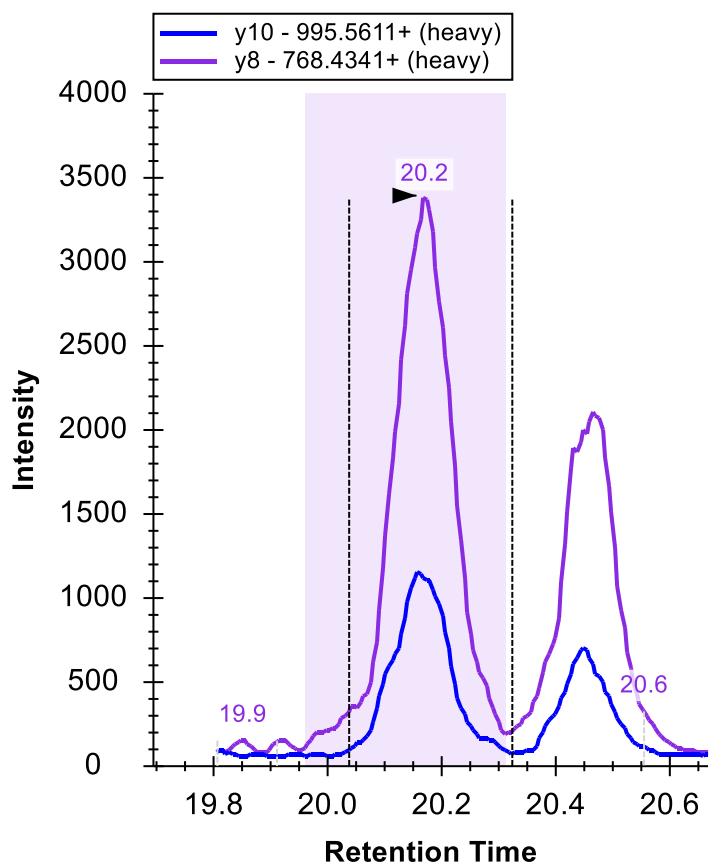

Supplementary Figure 5b1: Spectrum SYUB

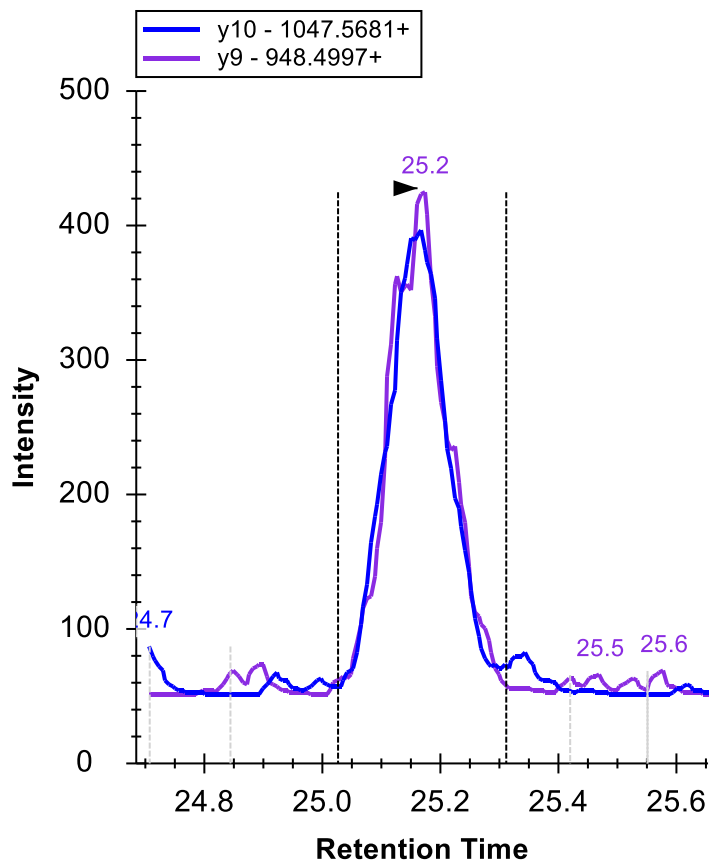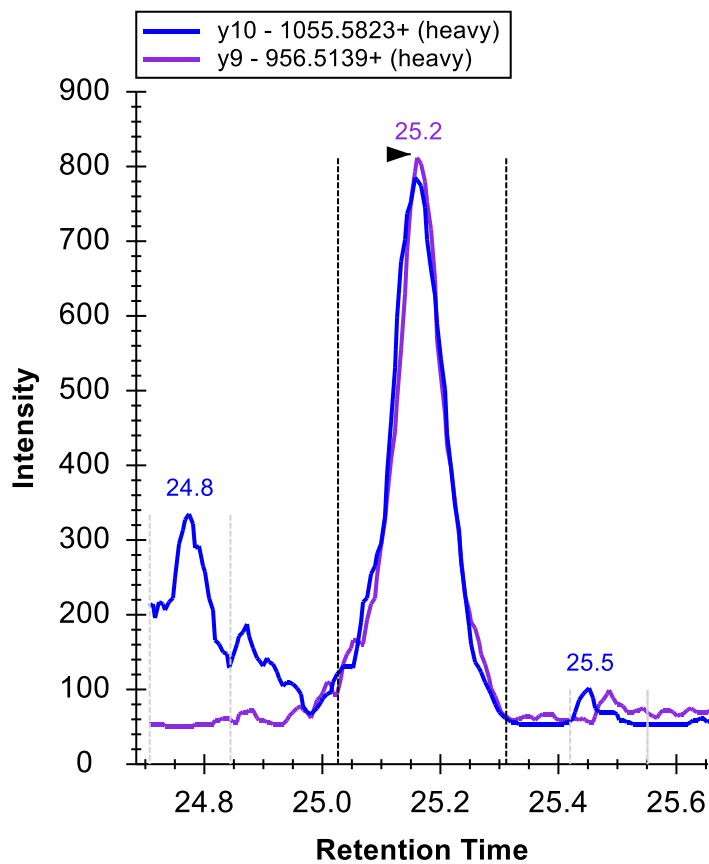

Supplementary Figure 5b2: Spectrum SYUG

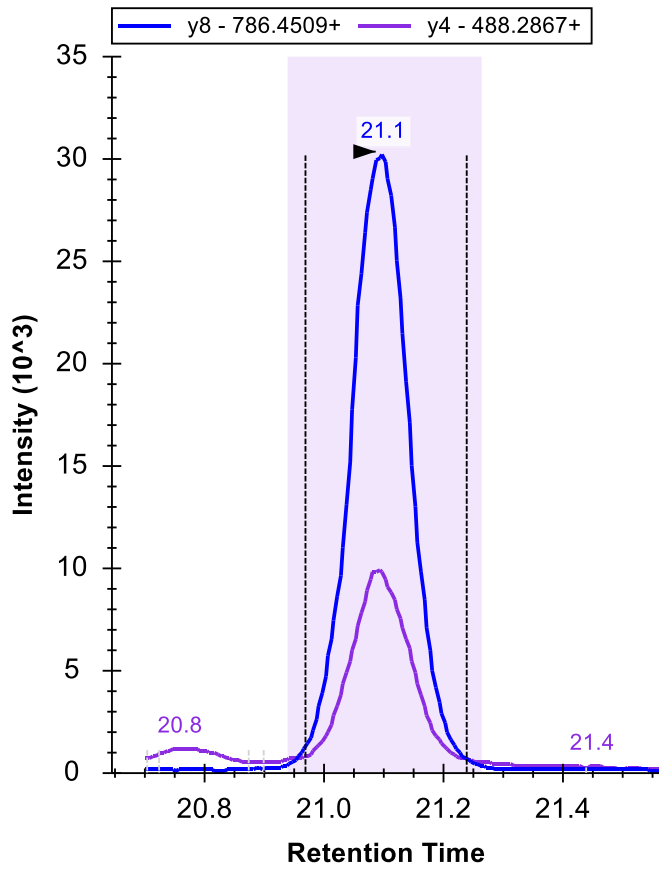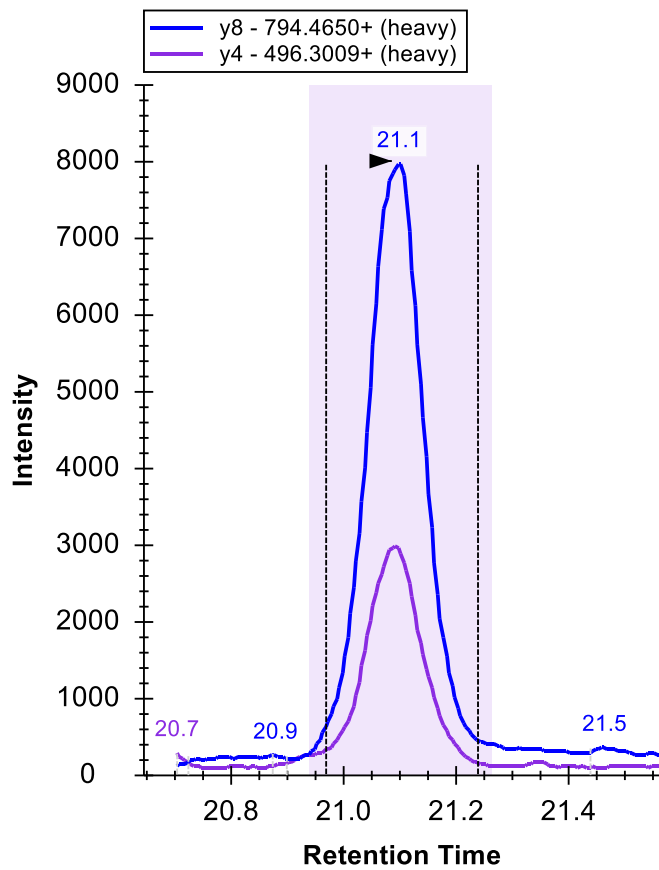

Supplementary Figure 5b3: Spectrum VGF\_AYQ

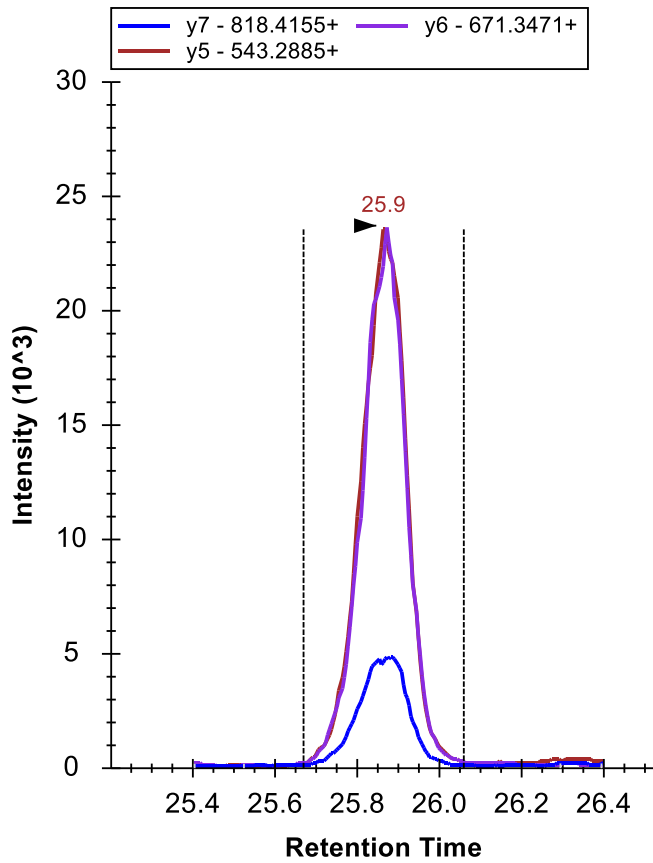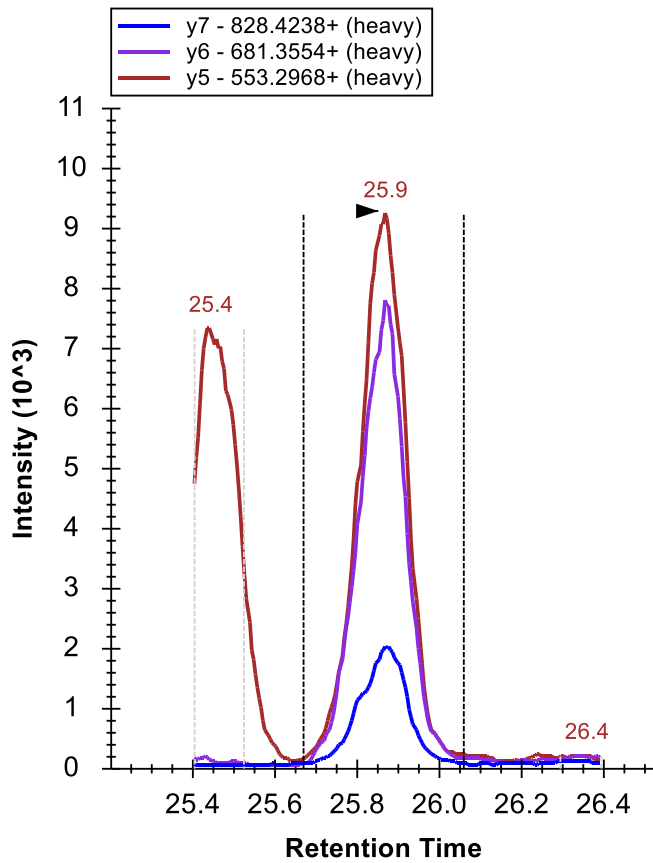

Supplementary Figure 5b4: Spectrum VGF\_NSE

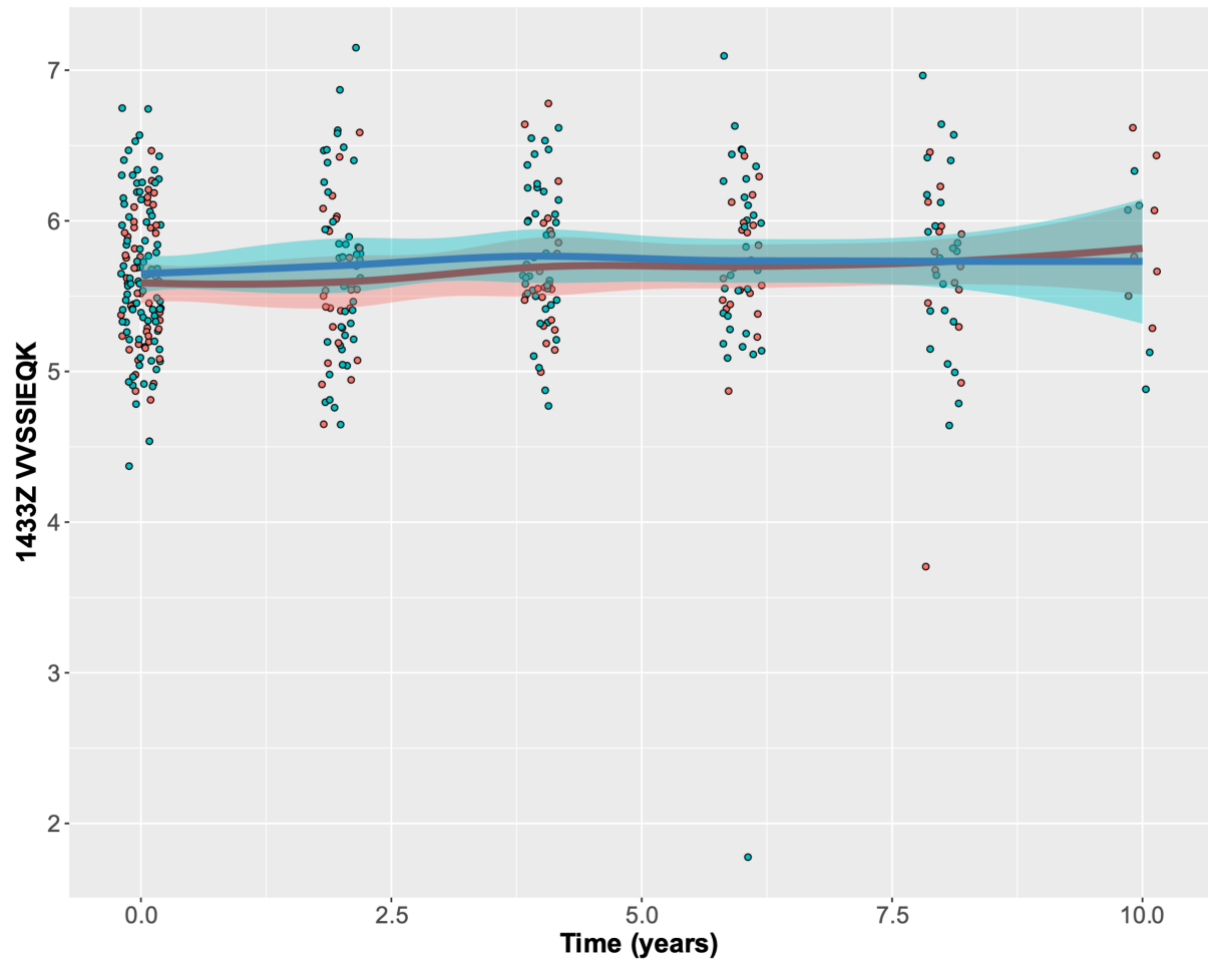

**Supplementary Figure 6a:** Longitudinal analysis of the cerebrospinal fluid levels over 10 years. The ribbon gives estimates of the standard error, the solid line gives a loose fit of the measured data points. Parkinson's disease: blue, healthy controls: red



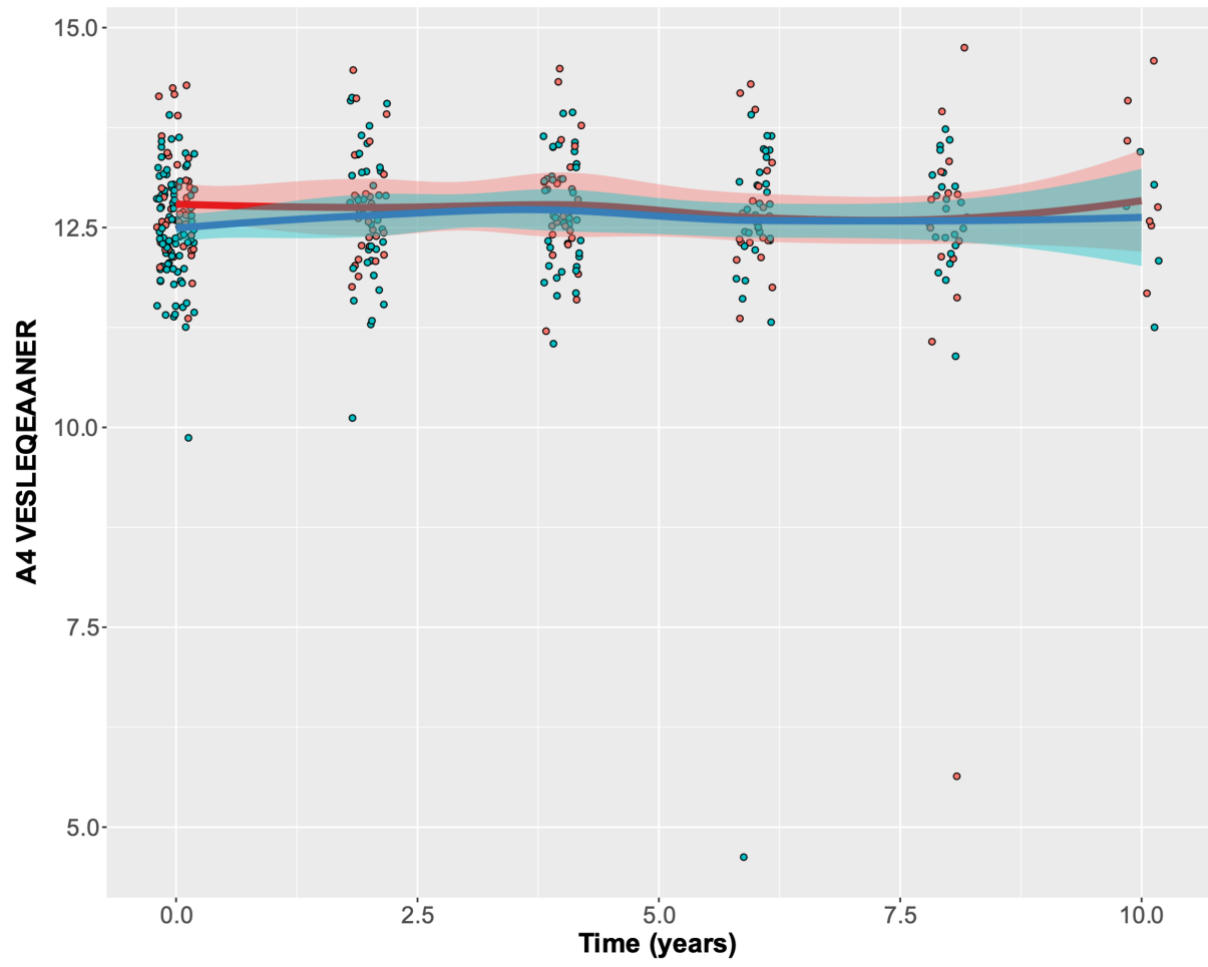

**Supplementary Figure 6b:** Longitudinal analysis of the cerebrospinal fluid levels over 10 years. The ribbon gives estimates of the standard error, the solid line gives a loose fit of the measured data points. Parkinson's disease: blue, healthy controls: red

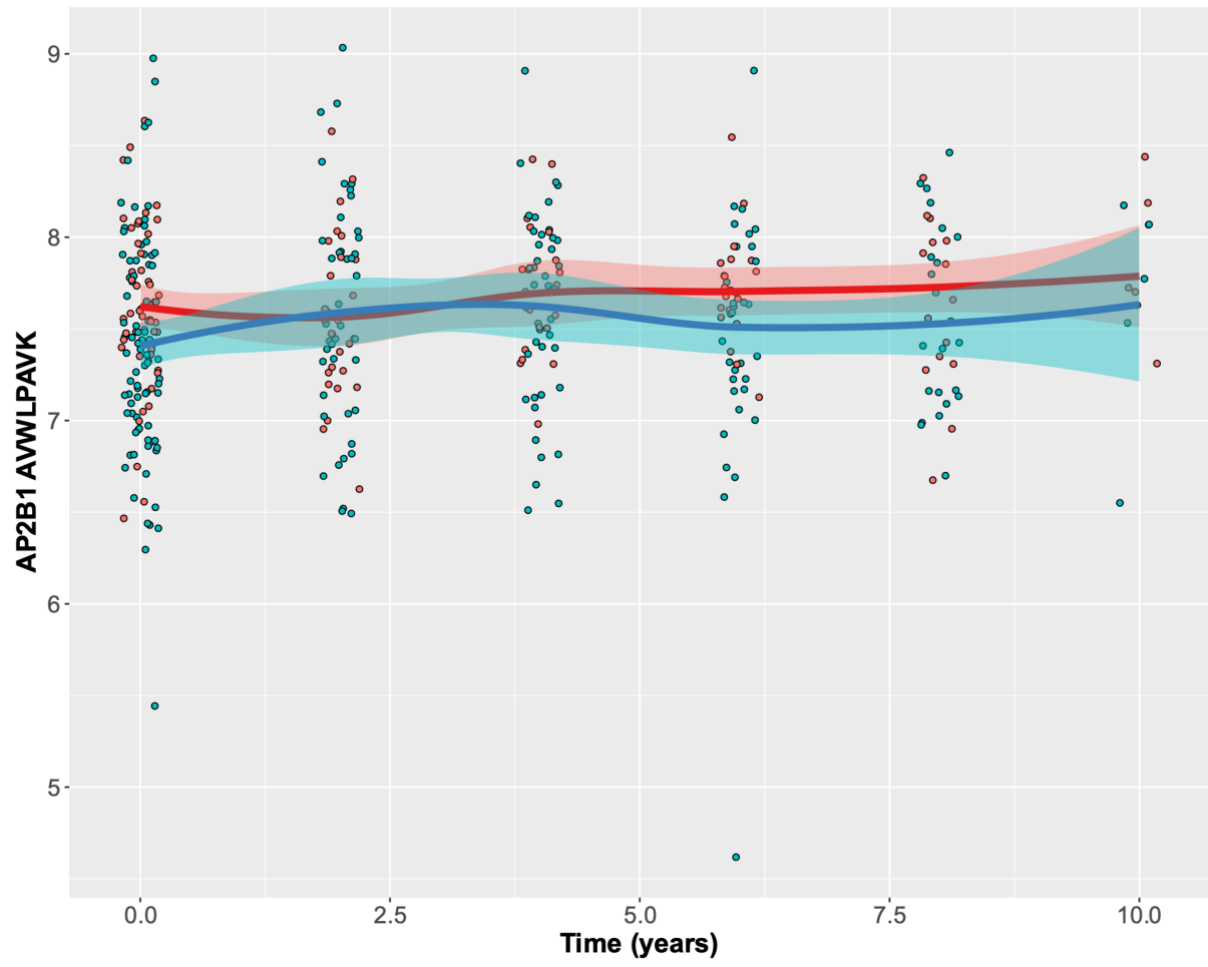

**Supplementary Figure 6c:** Longitudinal analysis of the cerebrospinal fluid levels over 10 years. The ribbon gives estimates of the standard error, the solid line gives a loose fit of the measured data points. Parkinson's disease: blue, healthy controls: red

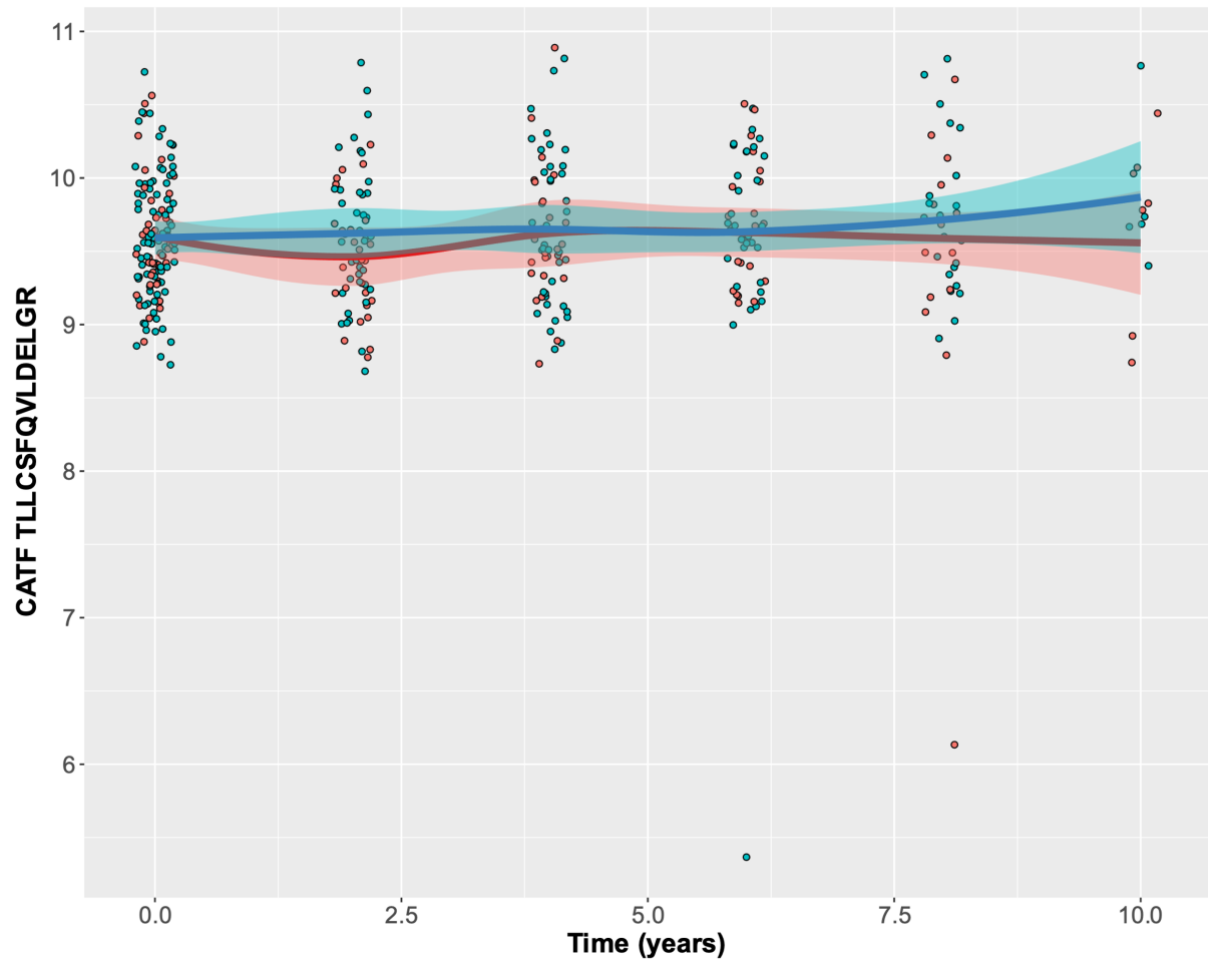

**Supplementary Figure 6d:** Longitudinal analysis of the cerebrospinal fluid levels over 10 years. The ribbon gives estimates of the standard error, the solid line gives a loose fit of the measured data points. Parkinson's disease: blue, healthy controls: red

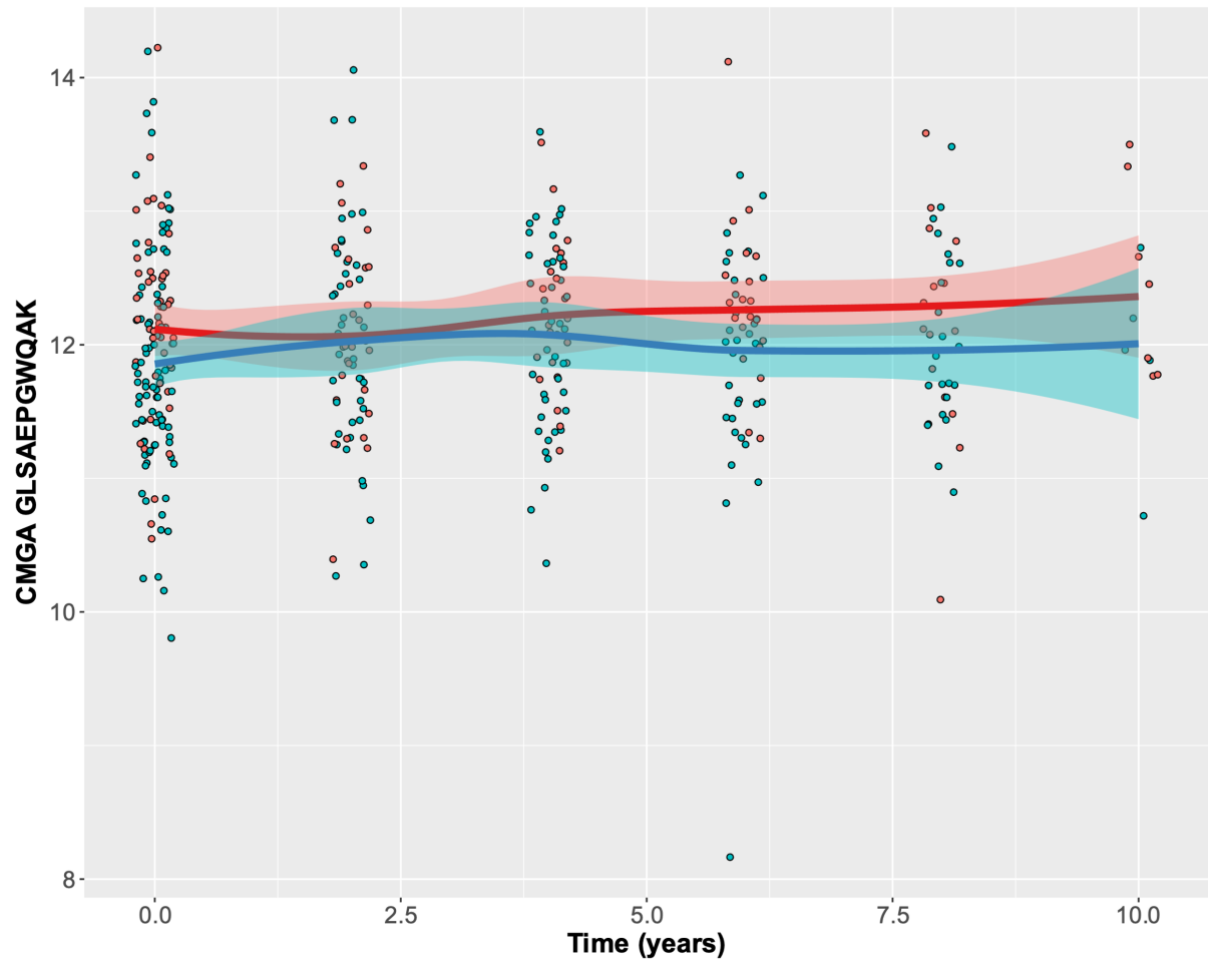

**Supplementary Figure 6e:** Longitudinal analysis of the cerebrospinal fluid levels over 10 years. The ribbon gives estimates of the standard error, the solid line gives a loose fit of the measured data points. Parkinson's disease: blue, healthy controls: red

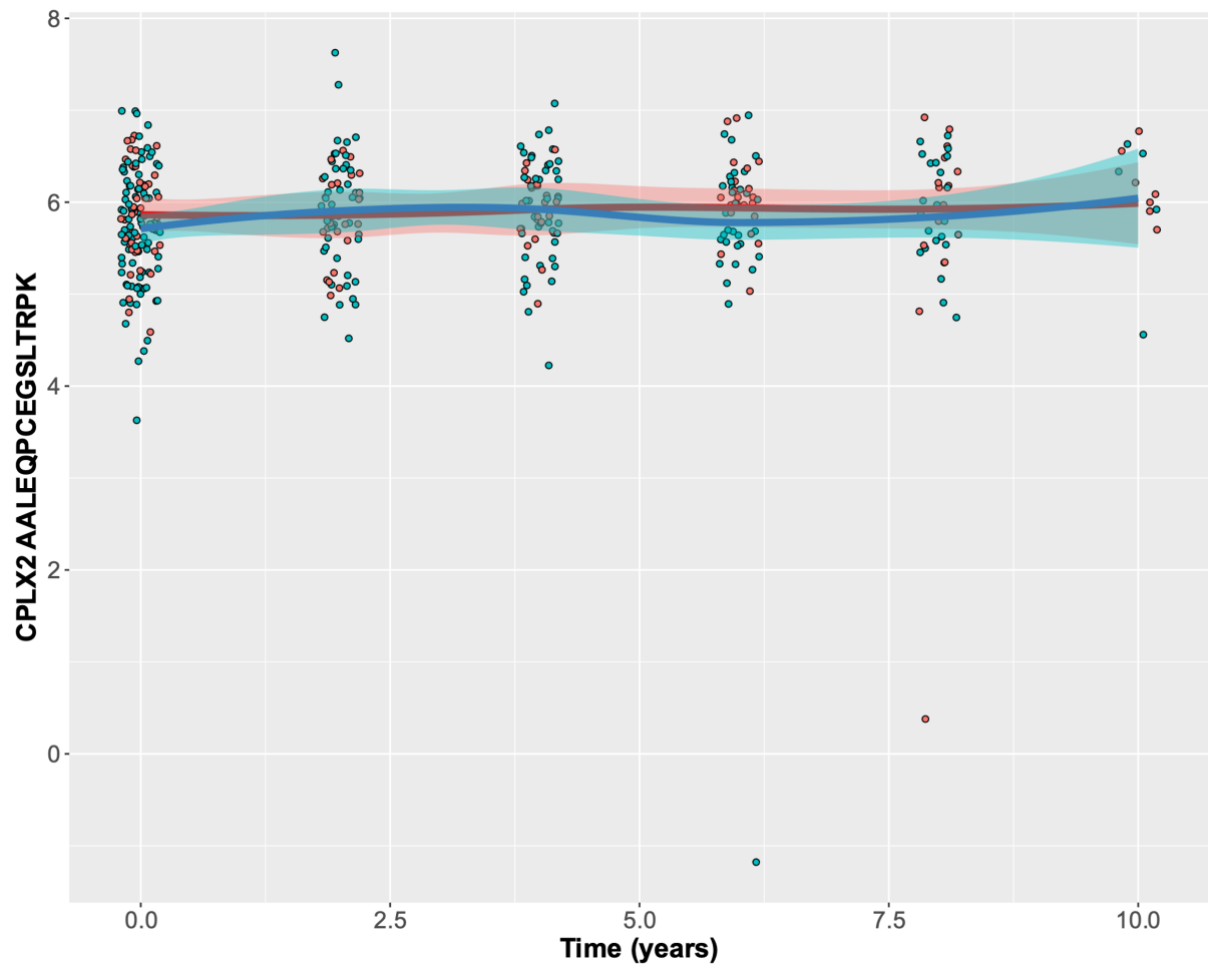

**Supplementary Figure 6f:** Longitudinal analysis of the cerebrospinal fluid levels over 10 years. The ribbon gives estimates of the standard error, the solid line gives a loose fit of the measured data points. Parkinson's disease: blue, healthy controls: red

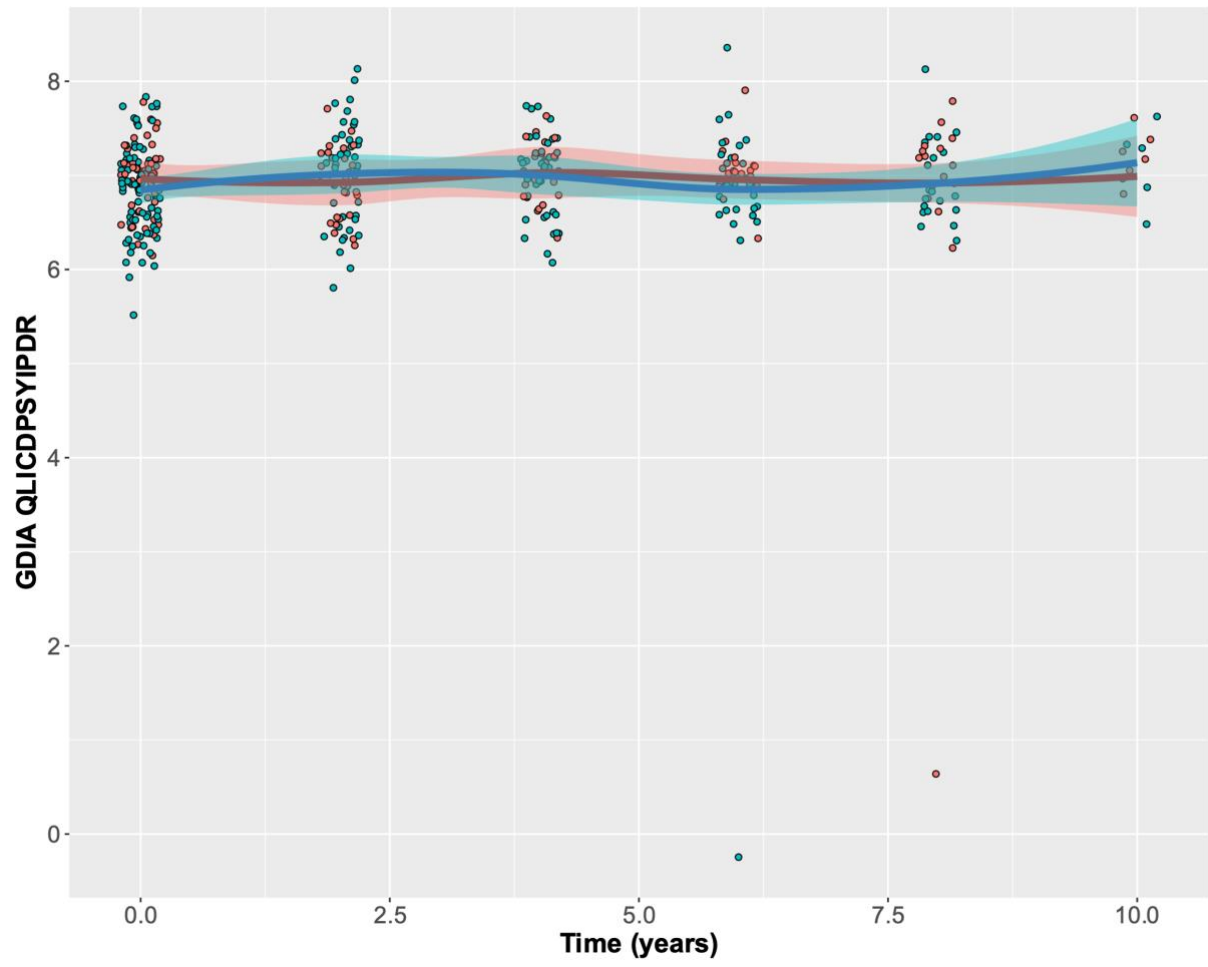

**Supplementary Figure 6g:** Longitudinal analysis of the cerebrospinal fluid levels over 10 years. The ribbon gives estimates of the standard error, the solid line gives a loose fit of the measured data points. Parkinson's disease: blue, healthy controls: red

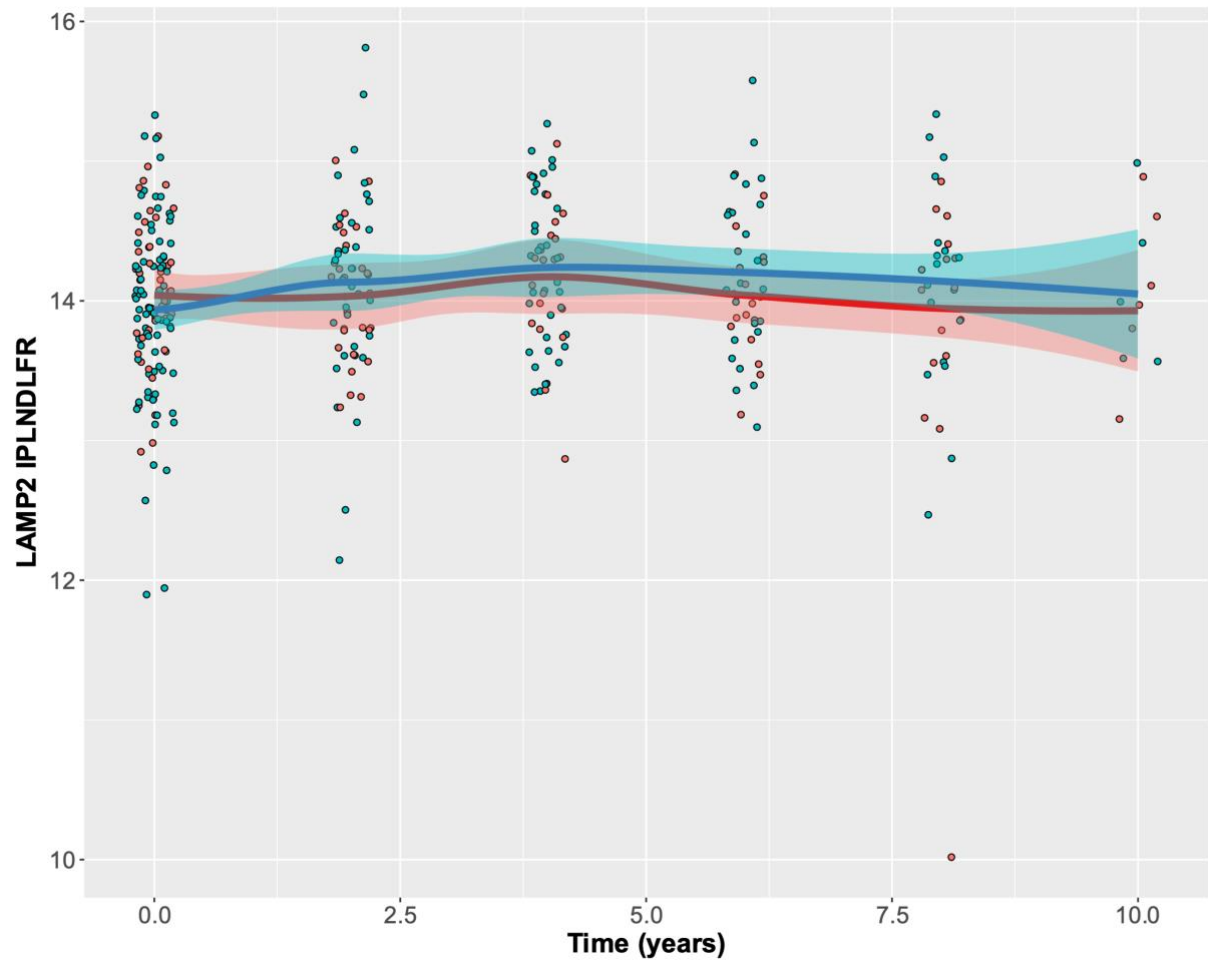

**Supplementary Figure 6h:** Longitudinal analysis of the cerebrospinal fluid levels over 10 years. The ribbon gives estimates of the standard error, the solid line gives a loose fit of the measured data points. Parkinson's disease: blue, healthy controls: red

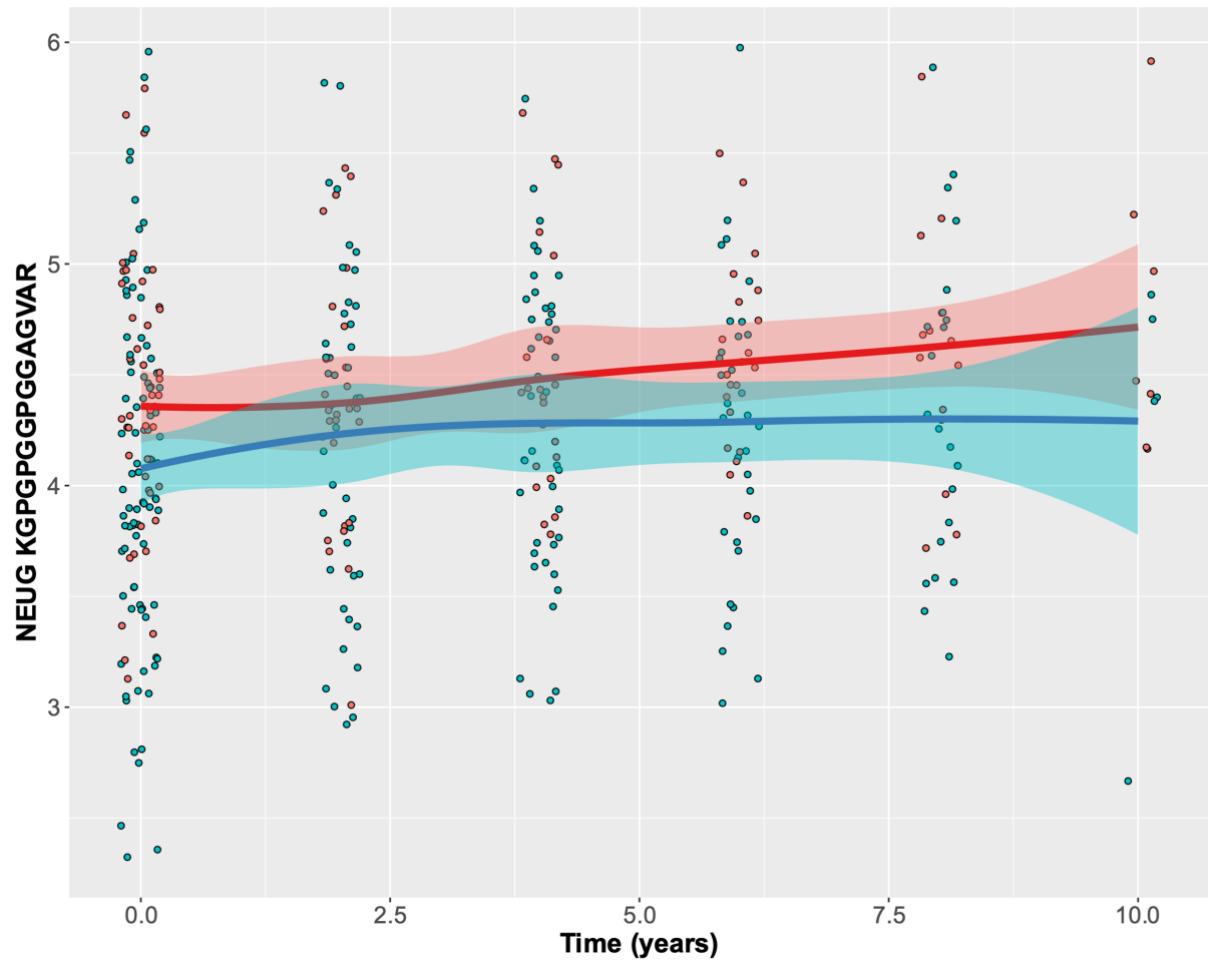

**Supplementary Figure 6i:** Longitudinal analysis of the cerebrospinal fluid levels over 10 years. The ribbon gives estimates of the standard error, the solid line gives a loose fit of the measured data points. Parkinson's disease: blue, healthy controls: red



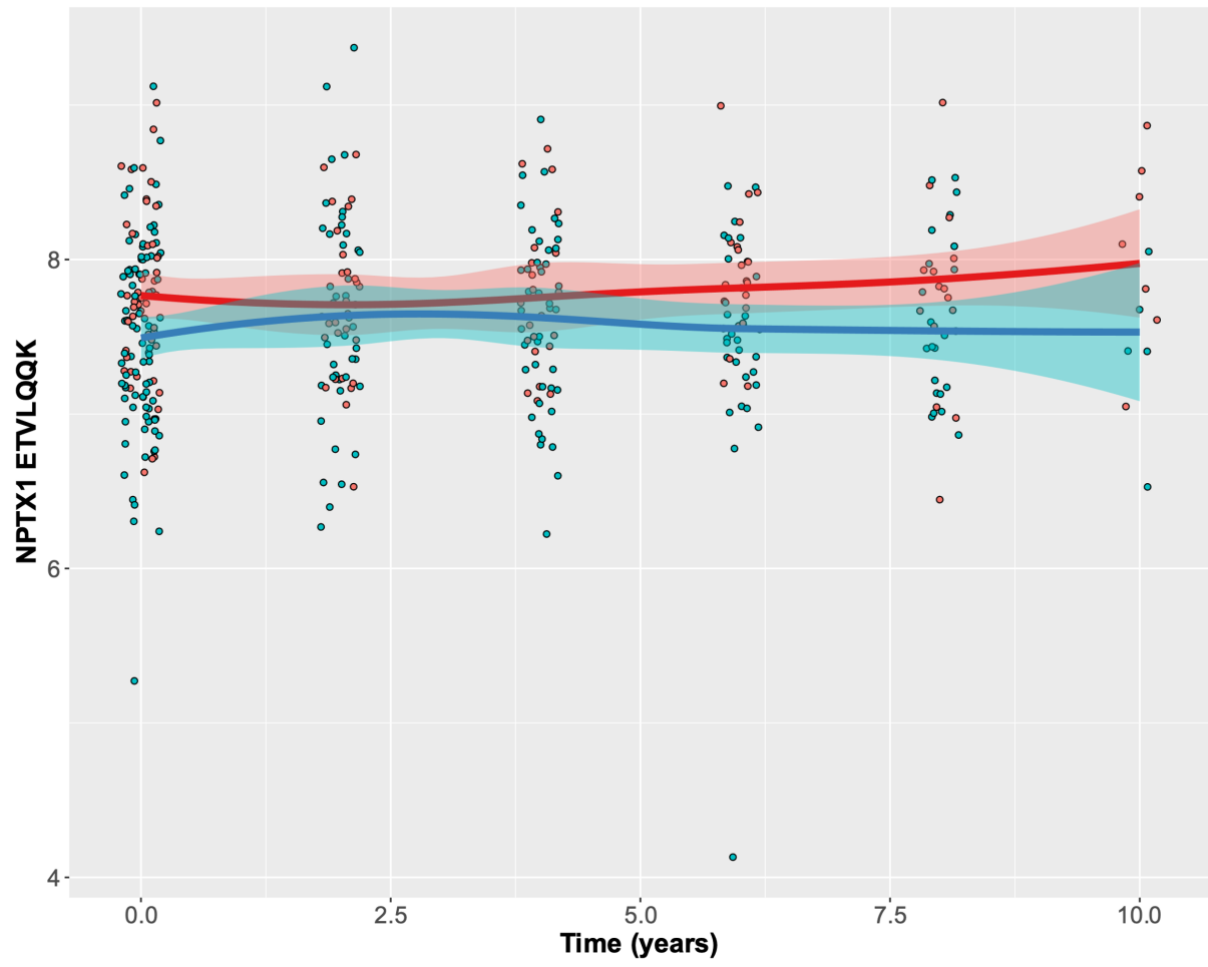

**Supplementary Figure 6j:** Longitudinal analysis of the cerebrospinal fluid levels over 10 years. The ribbon gives estimates of the standard error, the solid line gives a loose fit of the measured data points. Parkinson's disease: blue, healthy controls: red

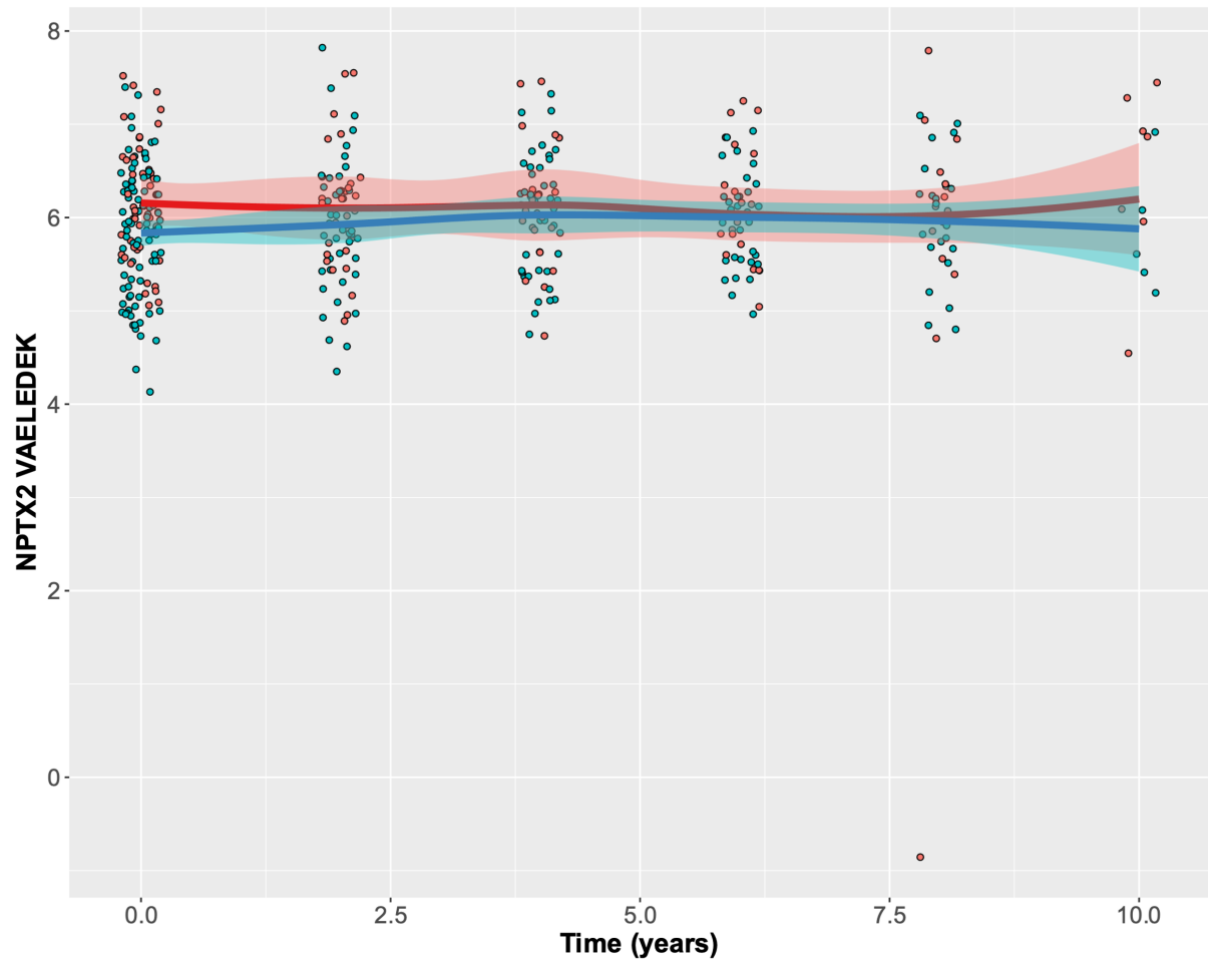

**Supplementary Figure 6k:** Longitudinal analysis of the cerebrospinal fluid levels over 10 years. The ribbon gives estimates of the standard error, the solid line gives a loose fit of the measured data points. Parkinson's disease: blue, healthy controls: red

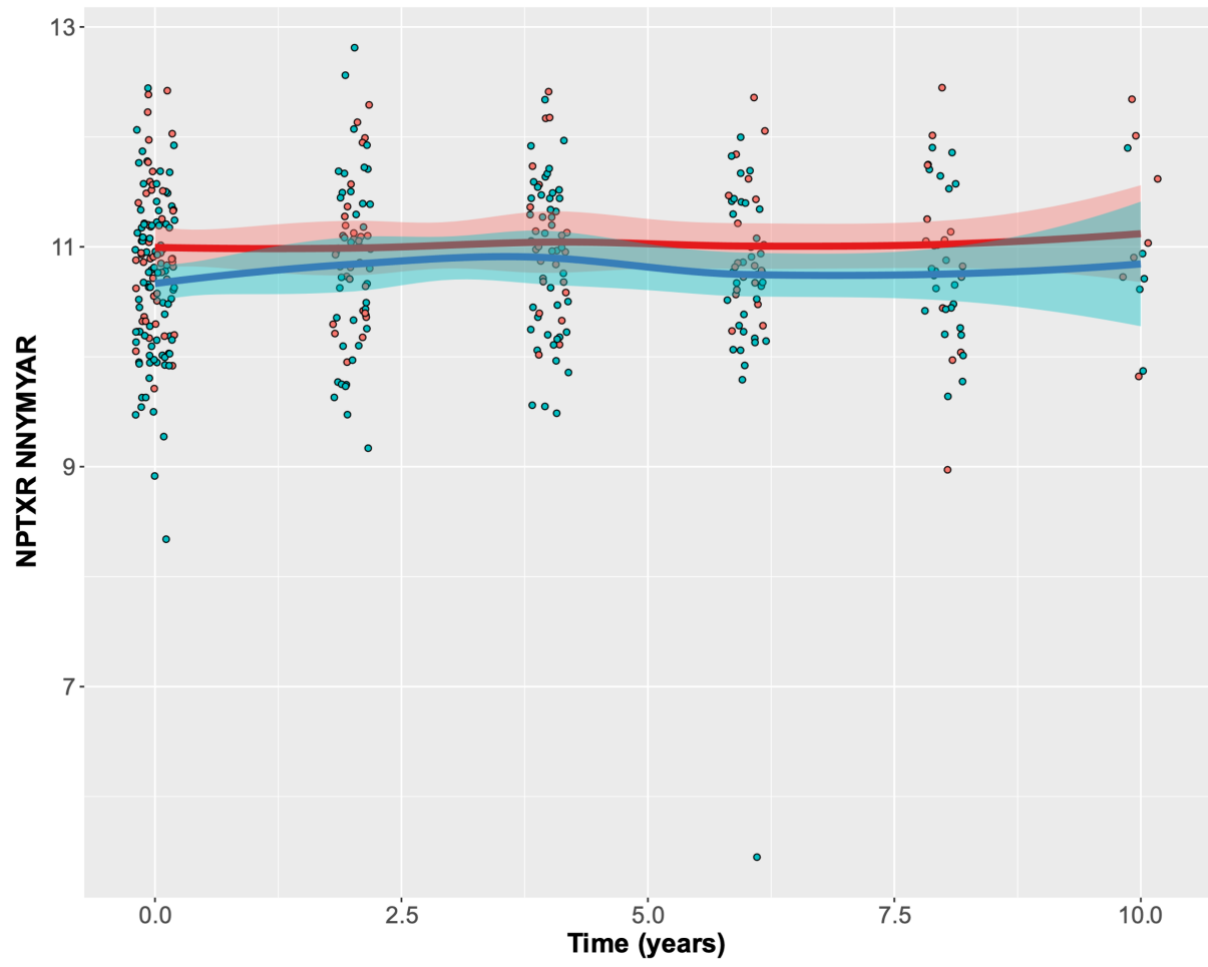

**Supplementary Figure 6I:** Longitudinal analysis of the cerebrospinal fluid levels over 10 years. The ribbon gives estimates of the standard error, the solid line gives a loose fit of the measured data points. Parkinson's disease: blue, healthy controls: red

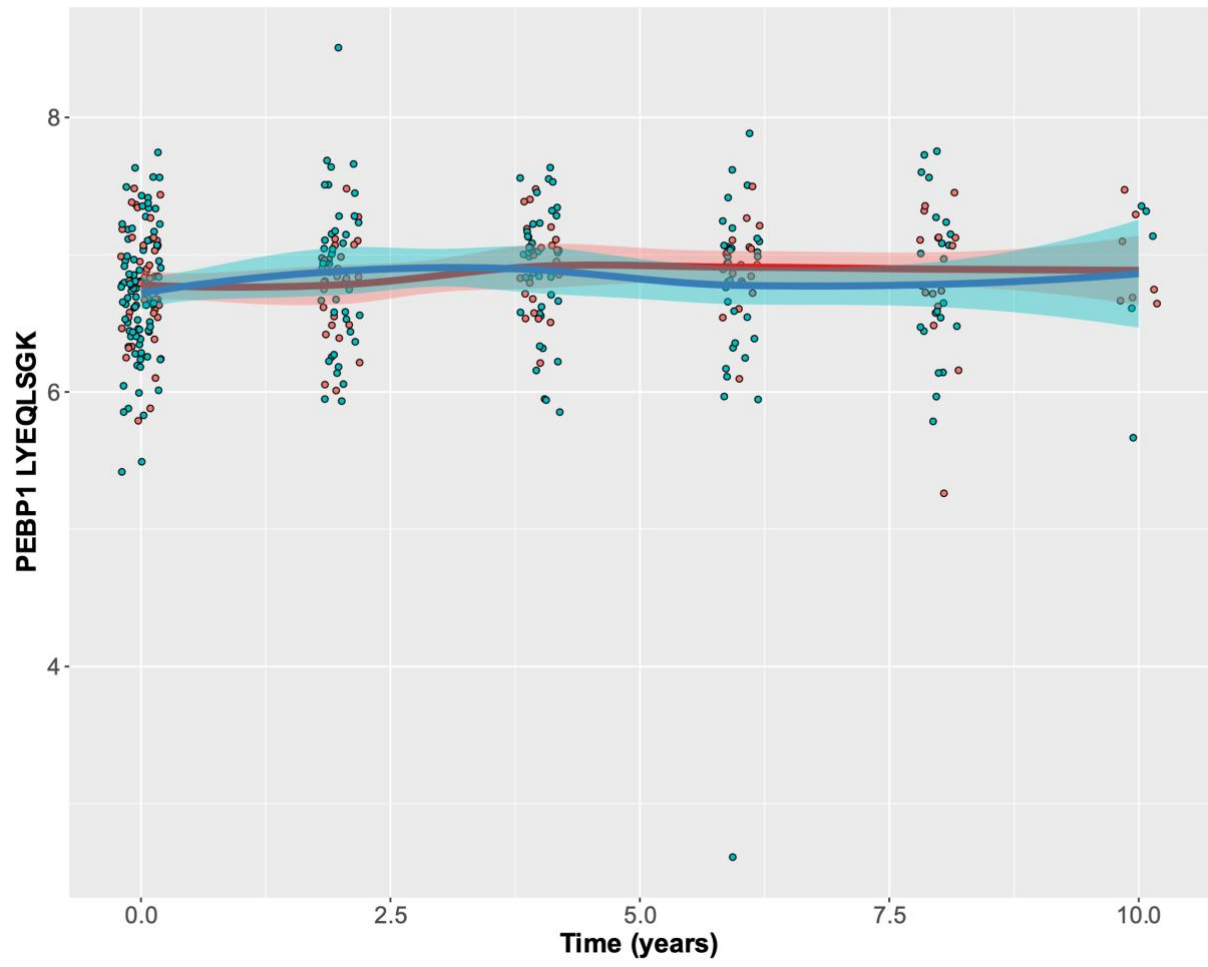

**Supplementary Figure 6m:** Longitudinal analysis of the cerebrospinal fluid levels over 10 years. The ribbon gives estimates of the standard error, the solid line gives a loose fit of the measured data points. Parkinson's disease: blue, healthy controls: red

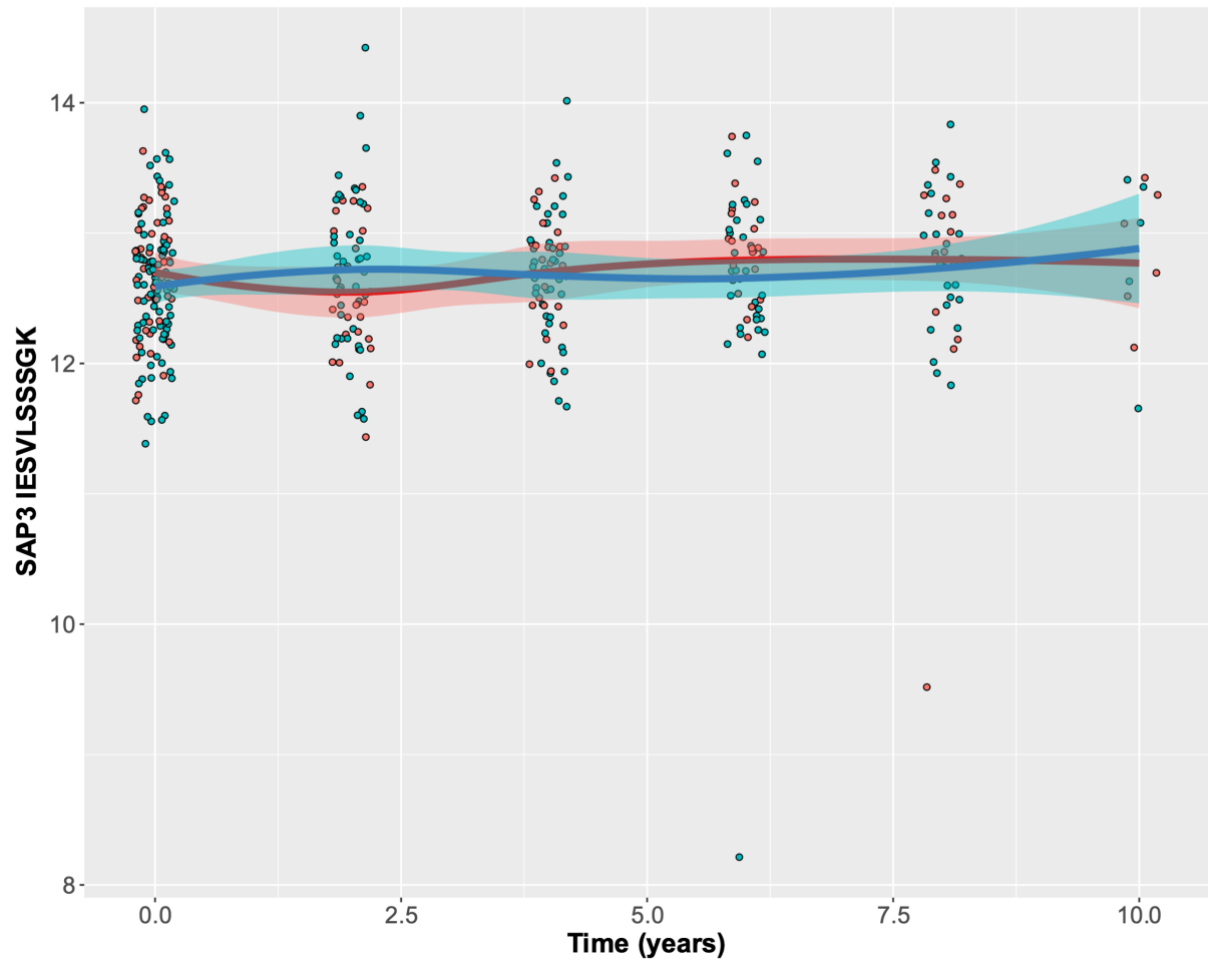

**Supplementary Figure 6n:** Longitudinal analysis of the cerebrospinal fluid levels over 10 years. The ribbon gives estimates of the standard error, the solid line gives a loose fit of the measured data points. Parkinson's disease: blue, healthy controls: red

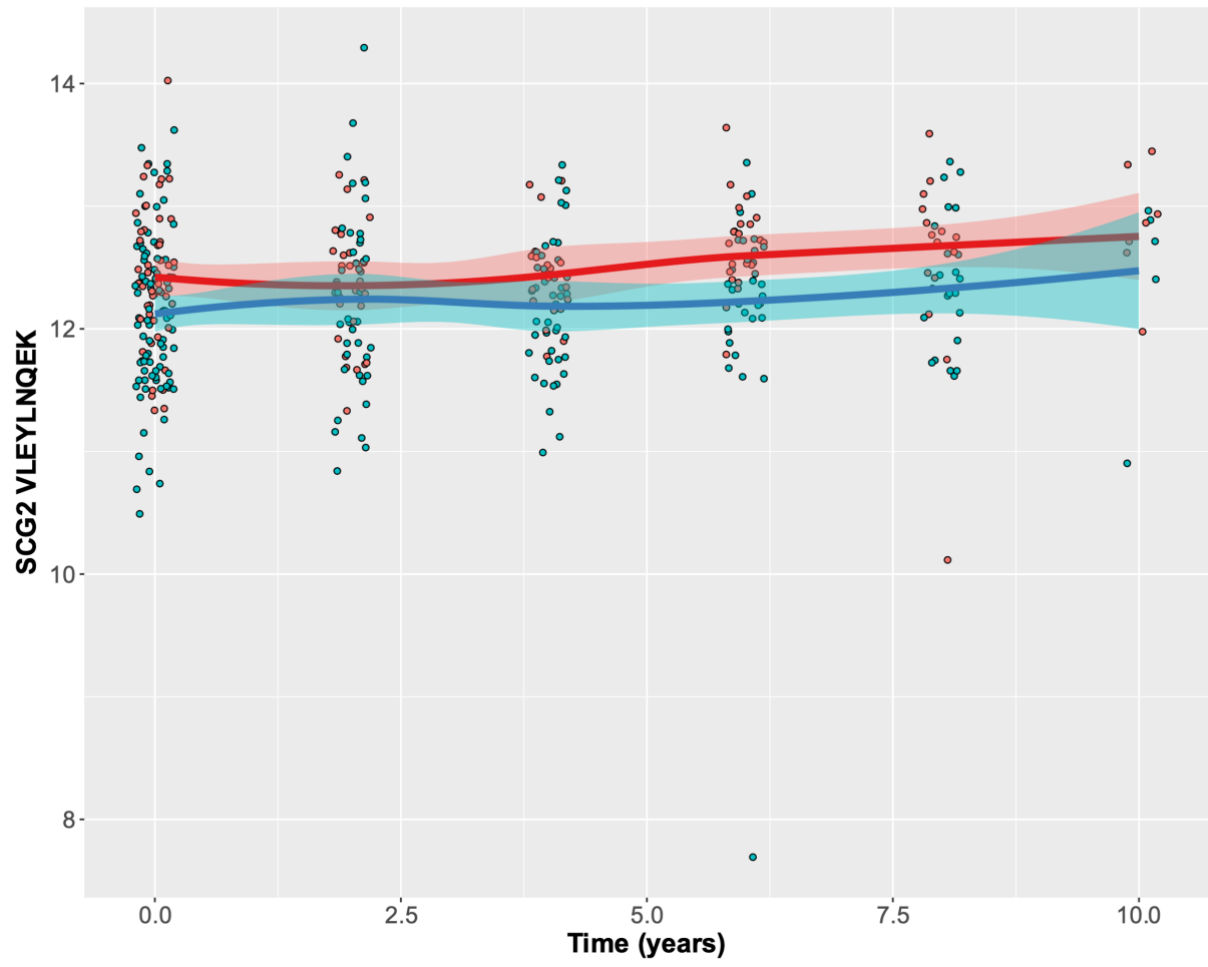

**Supplementary Figure 60:** Longitudinal analysis of the cerebrospinal fluid levels over 10 years. The ribbon gives estimates of the standard error, the solid line gives a loose fit of the measured data points. Parkinson's disease: blue, healthy controls: red

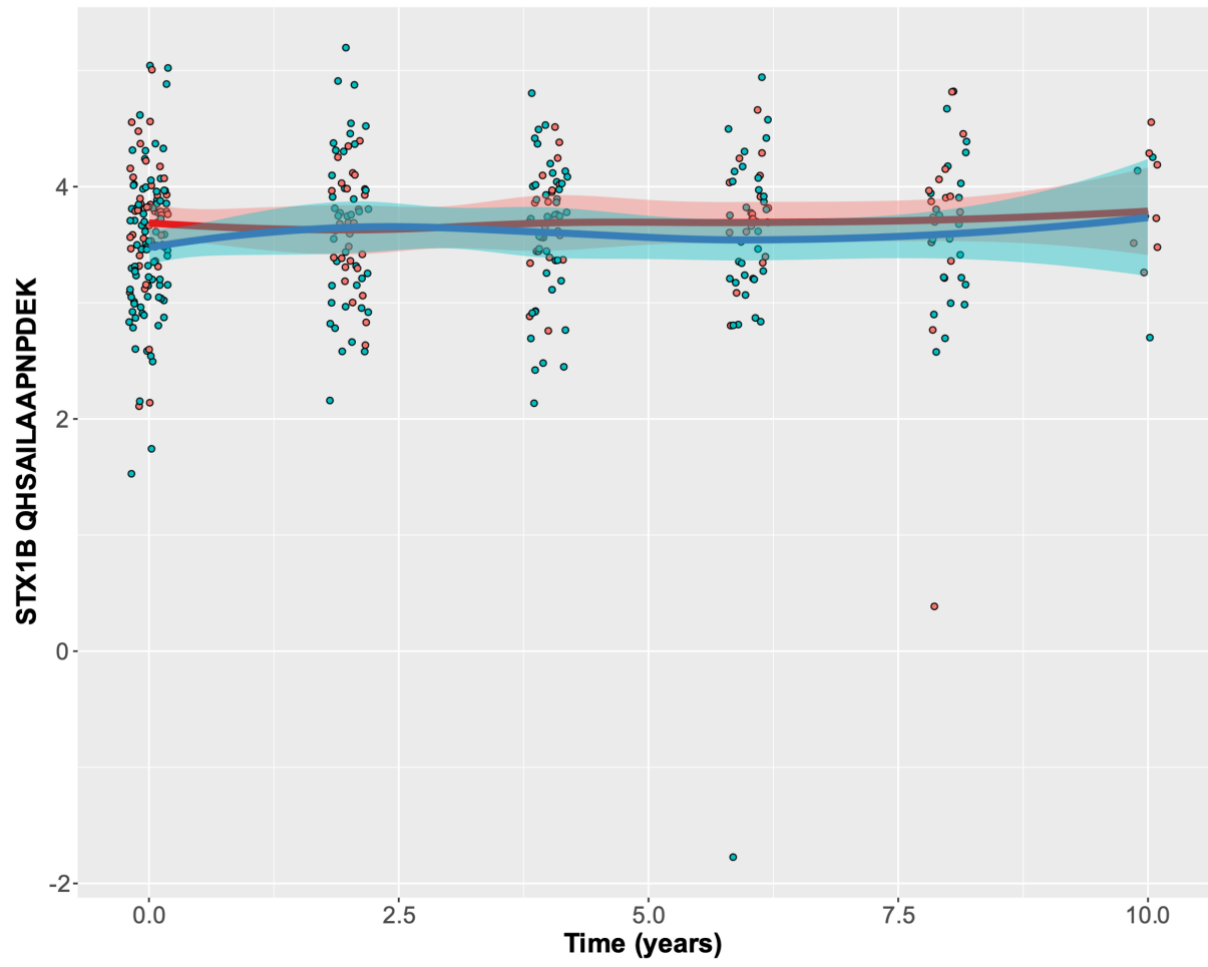

**Supplementary Figure 6p:** Longitudinal analysis of the cerebrospinal fluid levels over 10 years. The ribbon gives estimates of the standard error, the solid line gives a loose fit of the measured data points. Parkinson's disease: blue, healthy controls: red

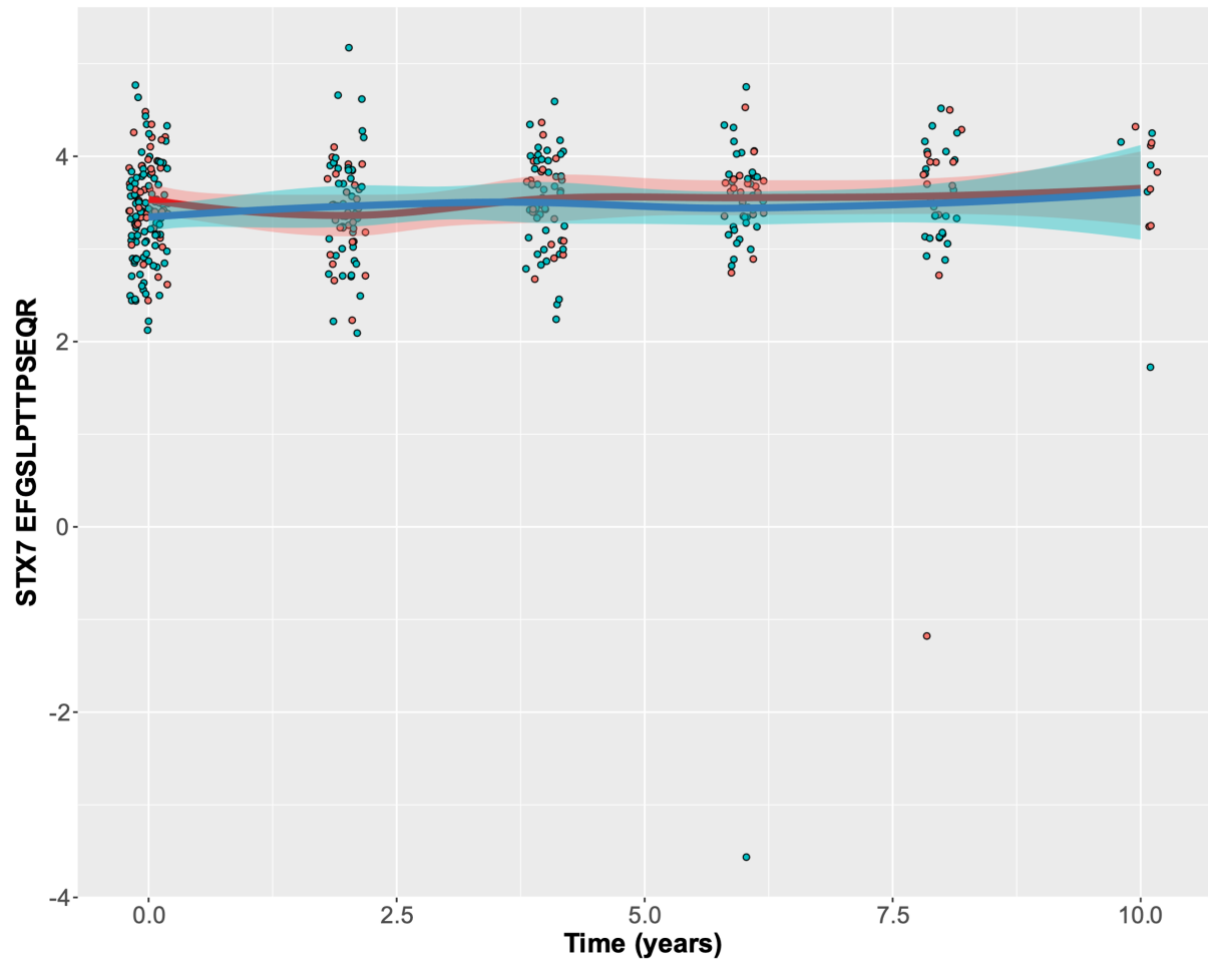

**Supplementary Figure 6q:** Longitudinal analysis of the cerebrospinal fluid levels over 10 years. The ribbon gives estimates of the standard error, the solid line gives a loose fit of the measured data points. Parkinson's disease: blue, healthy controls: red



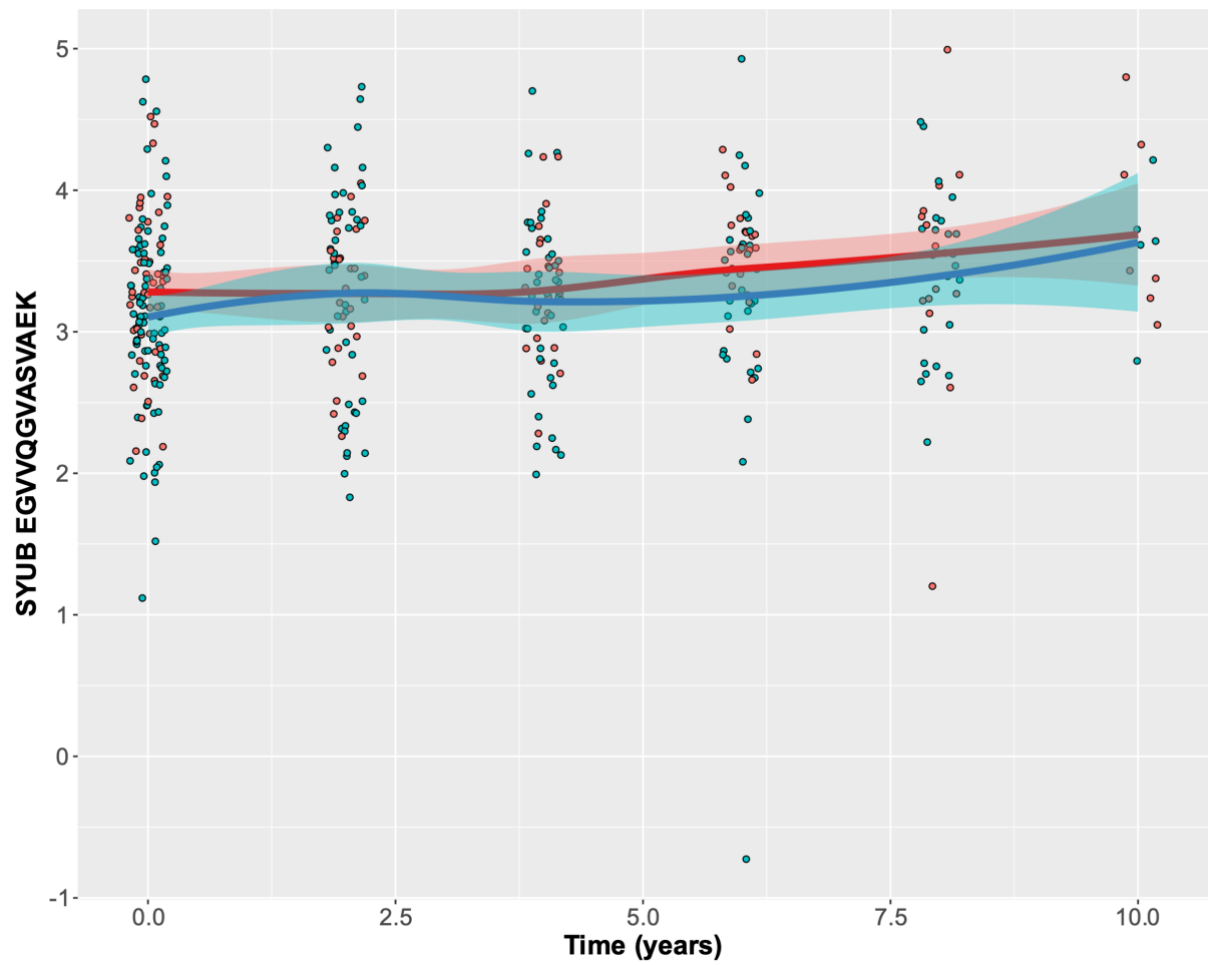

**Supplementary Figure 6r:** Longitudinal analysis of the cerebrospinal fluid levels over 10 years. The ribbon gives estimates of the standard error, the solid line gives a loose fit of the measured data points. Parkinson's disease: blue, healthy controls: red

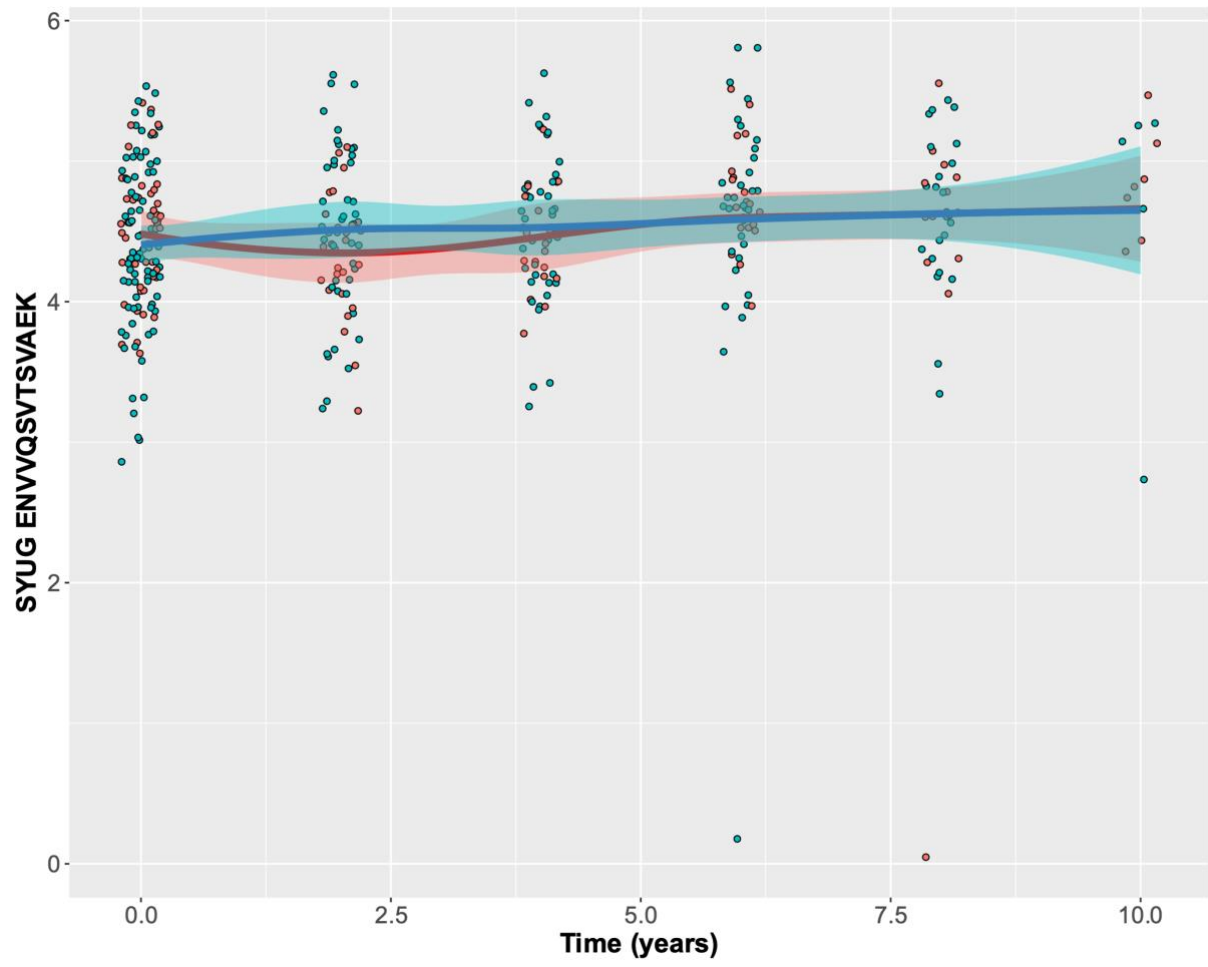

**Supplementary Figure 6s:** Longitudinal analysis of the cerebrospinal fluid levels over 10 years. The ribbon gives estimates of the standard error, the solid line gives a loose fit of the measured data points. Parkinson's disease: blue, healthy controls: red

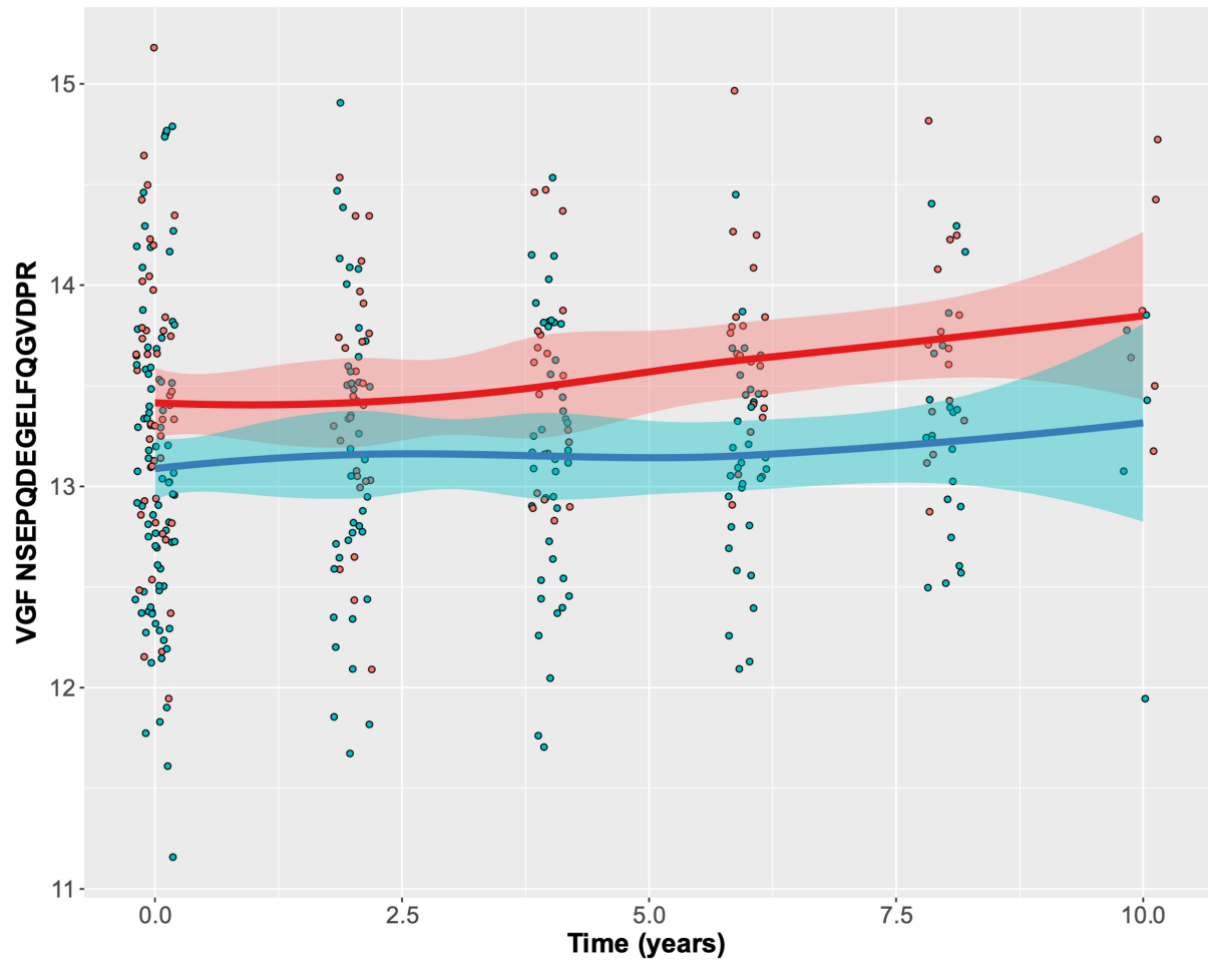

**Supplementary Figure 6t:** Longitudinal analysis of the cerebrospinal fluid levels over 10 years. The ribbon gives estimates of the standard error, the solid line gives a loose fit of the measured data points. Parkinson's disease: blue, healthy controls: red

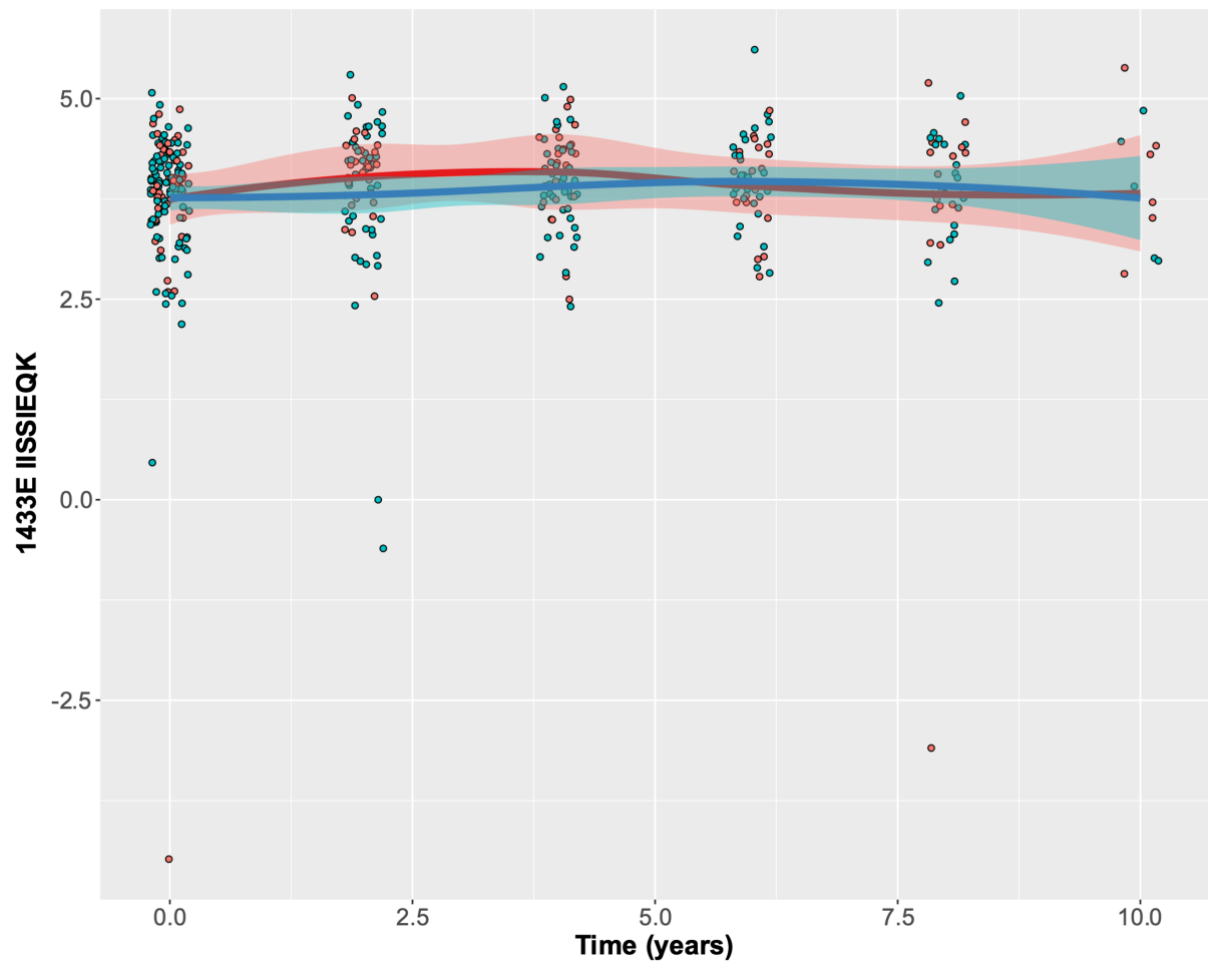

**Supplementary Figure 6u:** Longitudinal analysis of the cerebrospinal fluid levels over 10 years. The ribbon gives estimates of the standard error, the solid line gives a loose fit of the measured data points. Parkinson's disease: blue, healthy controls: red

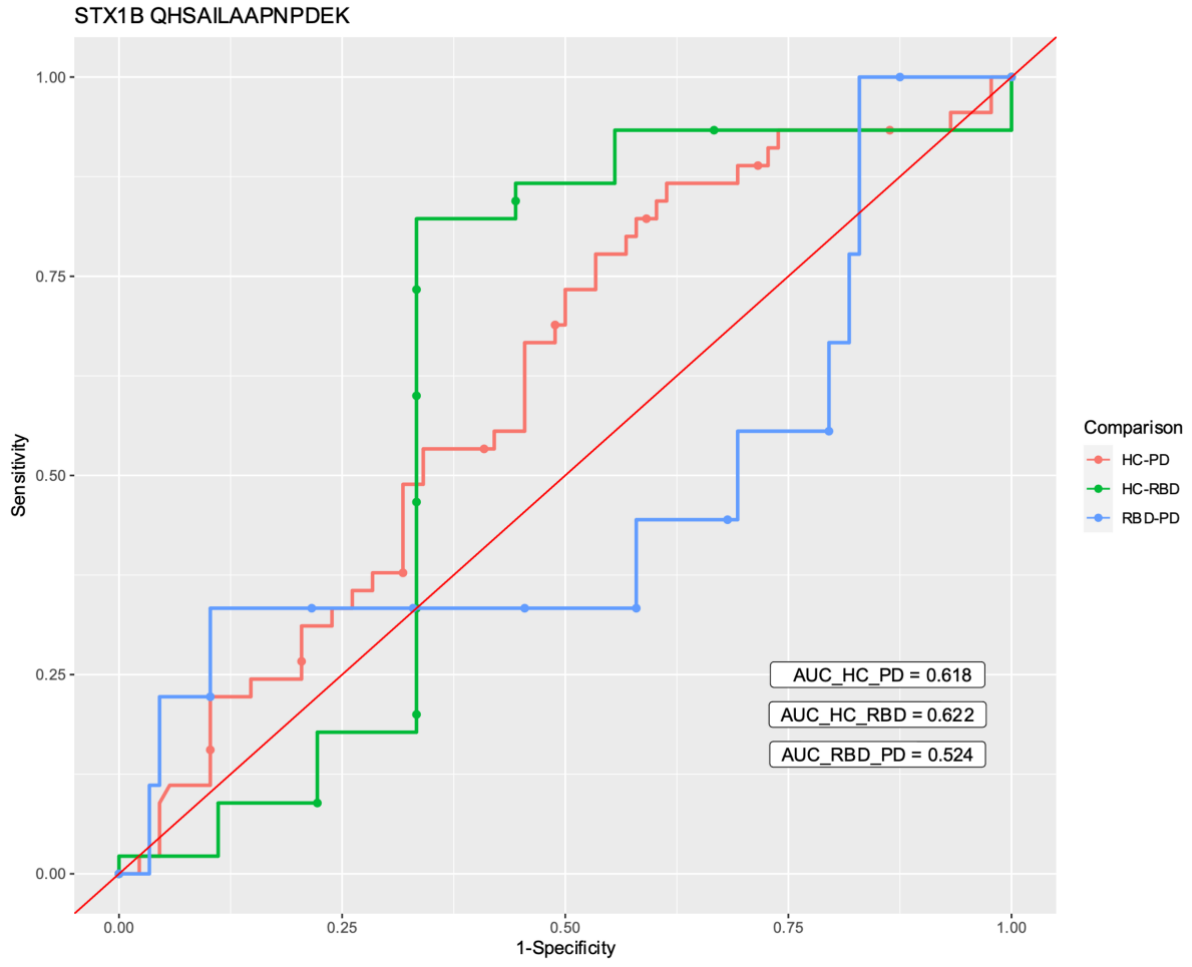

**Supplementary Figure 7a:** Results of the discrimination analysis based on receiver operating characteristics (ROC)

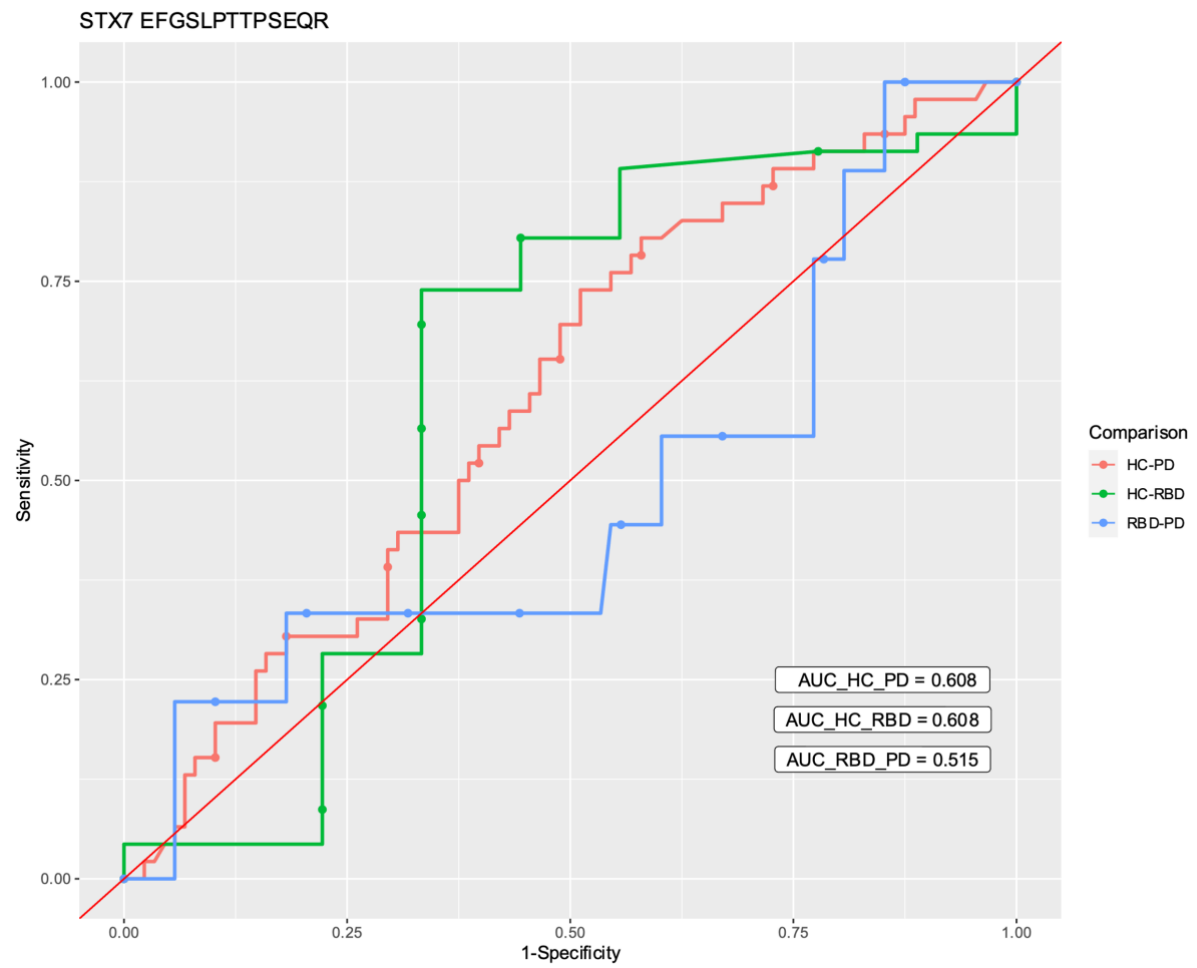

**Supplementary Figure 7b:** Results of the discrimination analysis based on receiver operating characteristics (ROC)

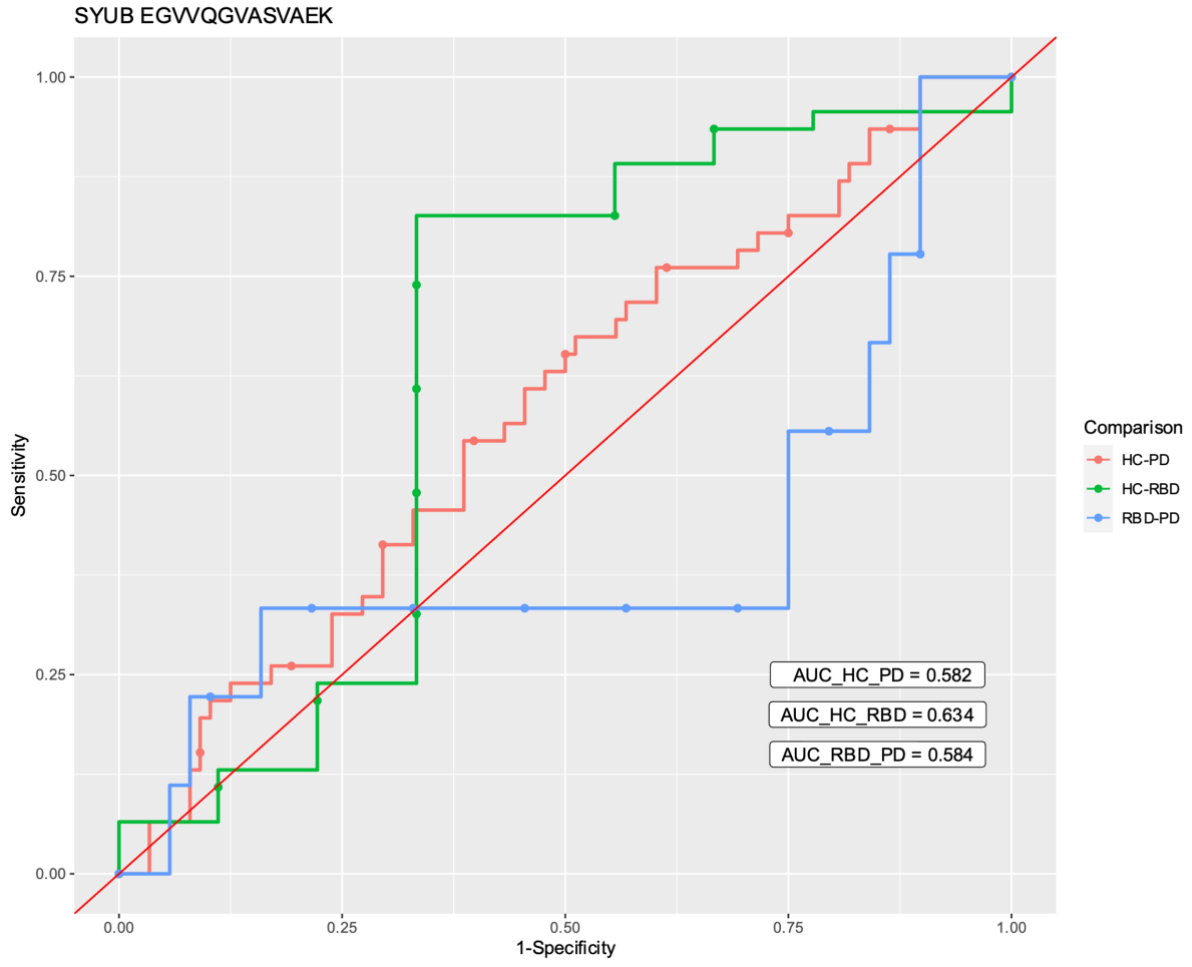

**Supplementary Figure 7c:** Results of the discrimination analysis based on receiver operating characteristics (ROC)

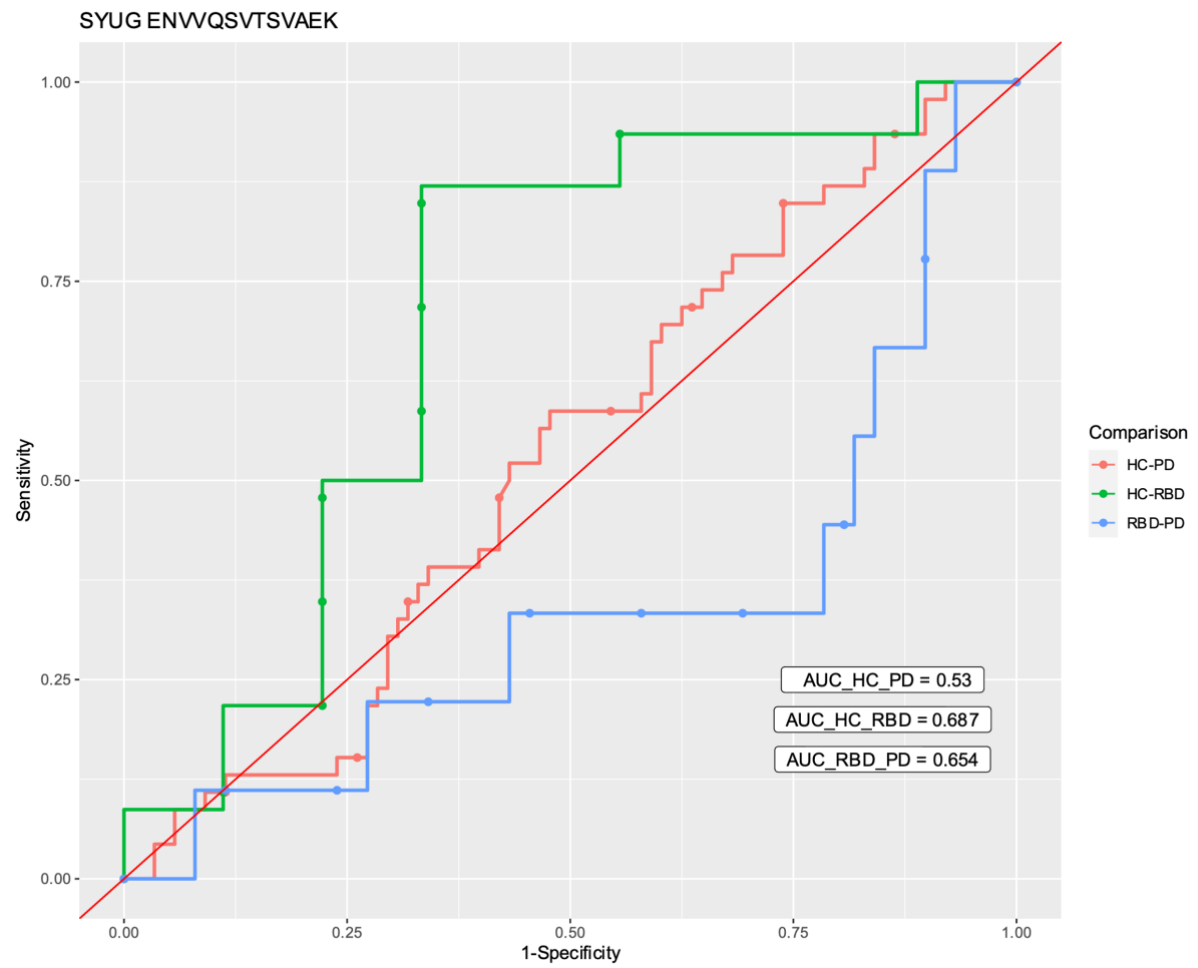

**Supplementary Figure 7d:** Results of the discrimination analysis based on receiver operating characteristics (ROC)



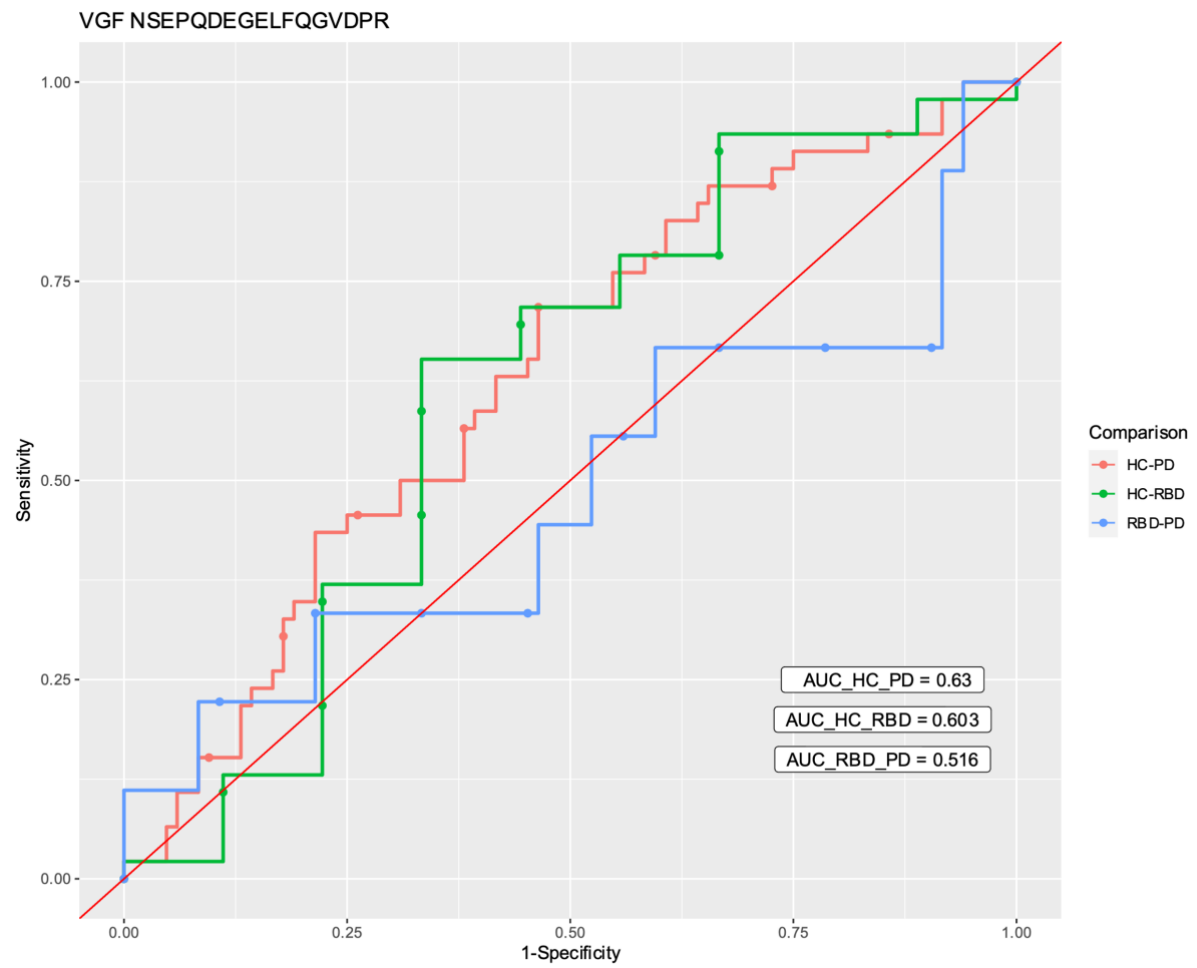

**Supplementary Figure 7e:** Results of the discrimination analysis based on receiver operating characteristics (ROC)

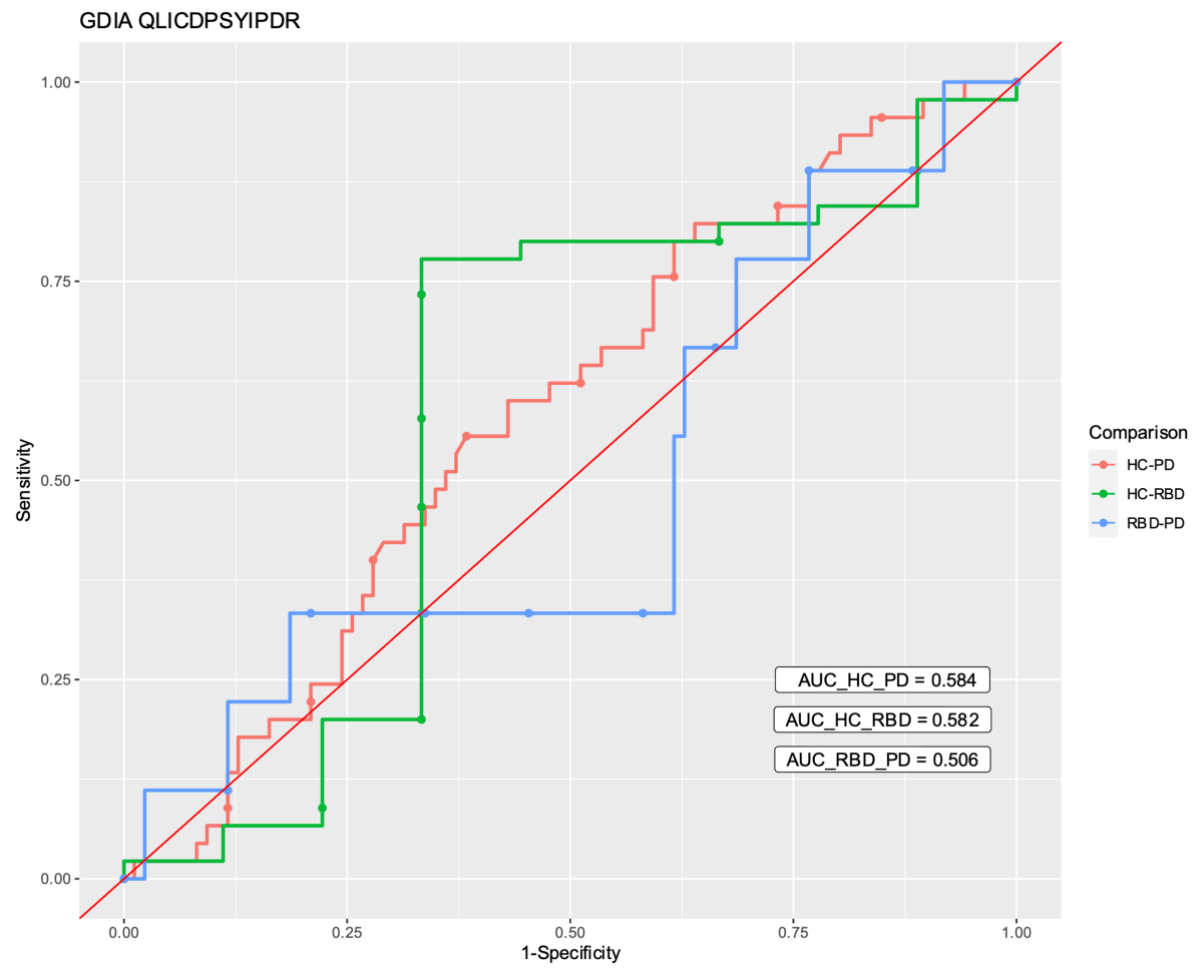

**Supplementary Figure 7f:** Results of the discrimination analysis based on receiver operating characteristics (ROC)

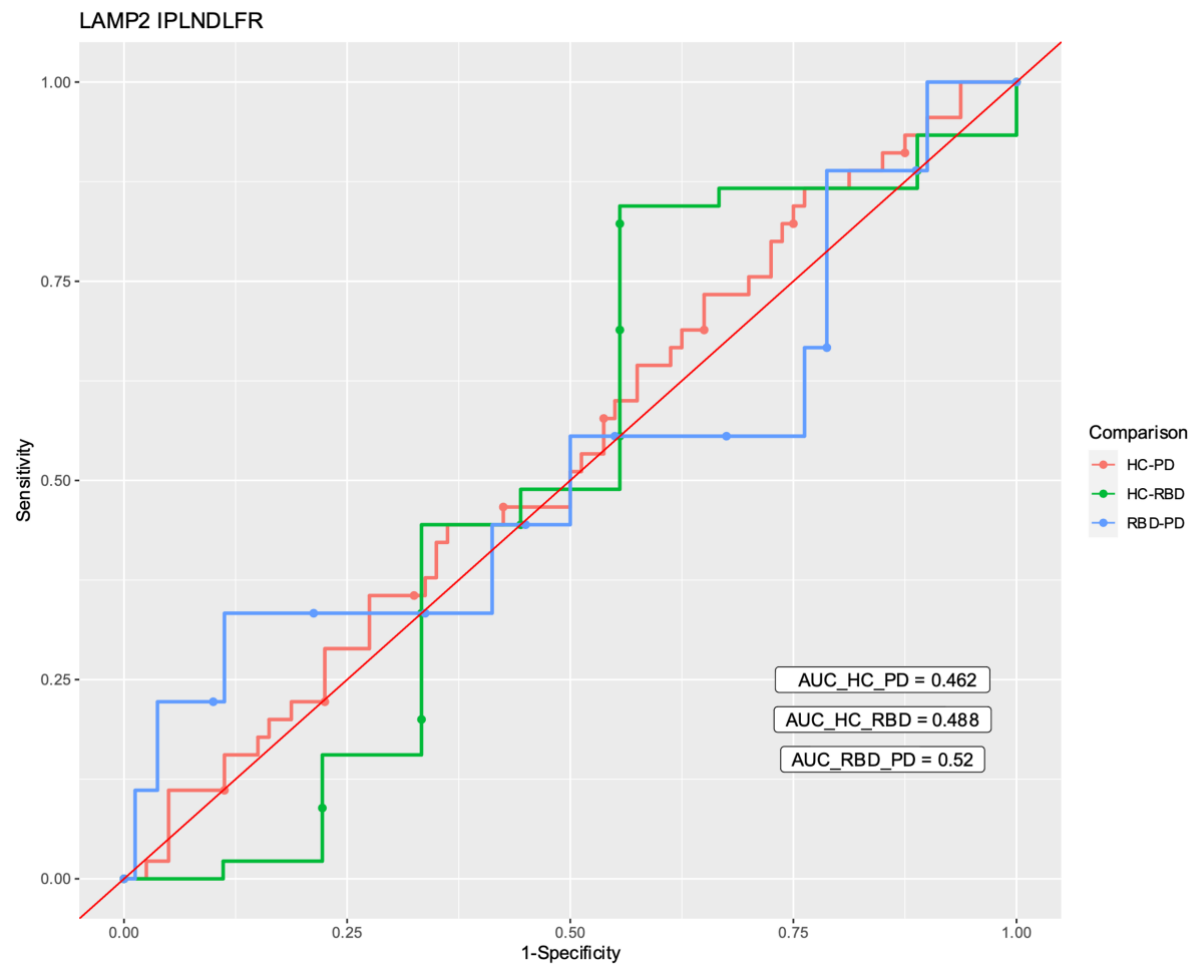

**Supplementary Figure 7g:** Results of the discrimination analysis based on receiver operating characteristics (ROC)

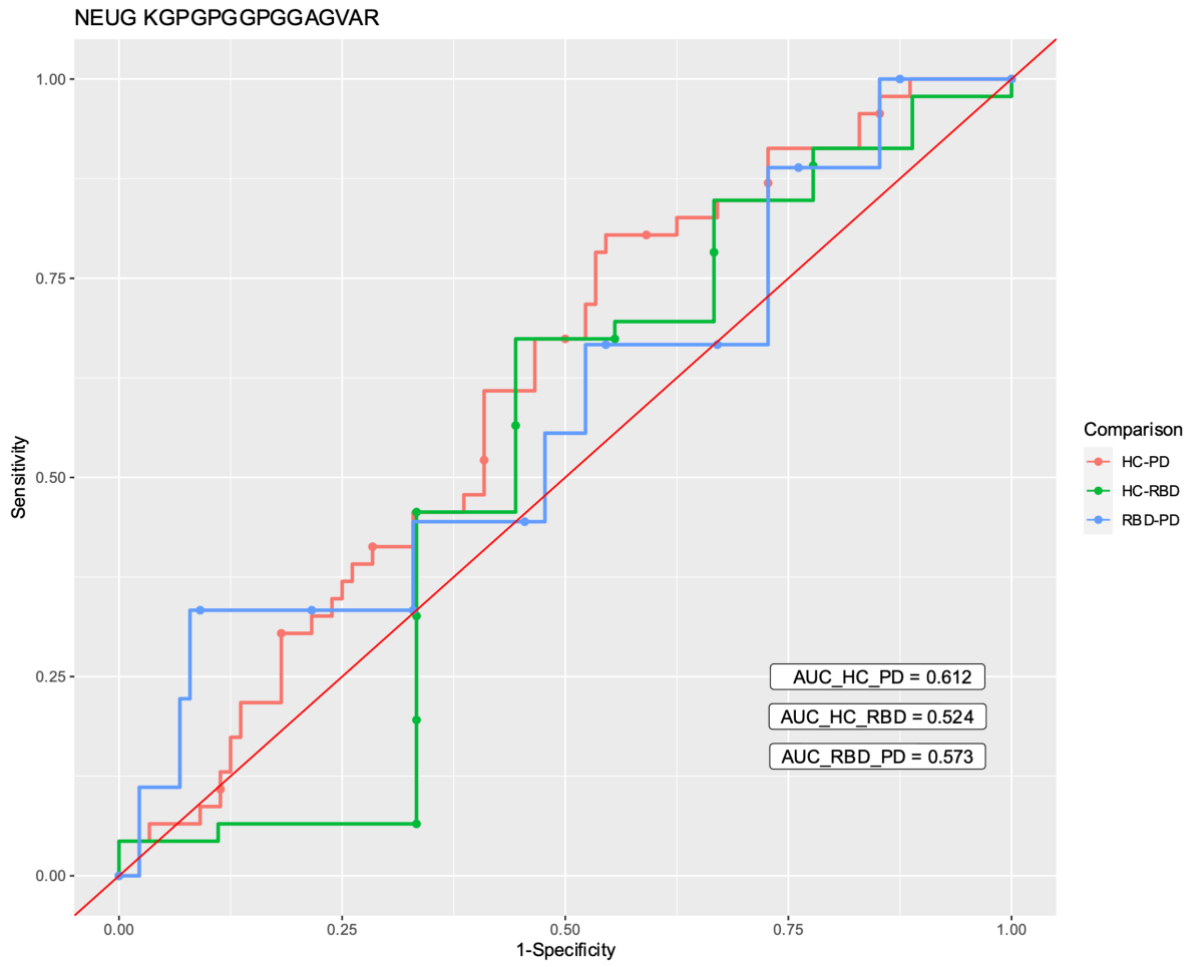

**Supplementary Figure 7h:** Results of the discrimination analysis based on receiver operating characteristics (ROC)

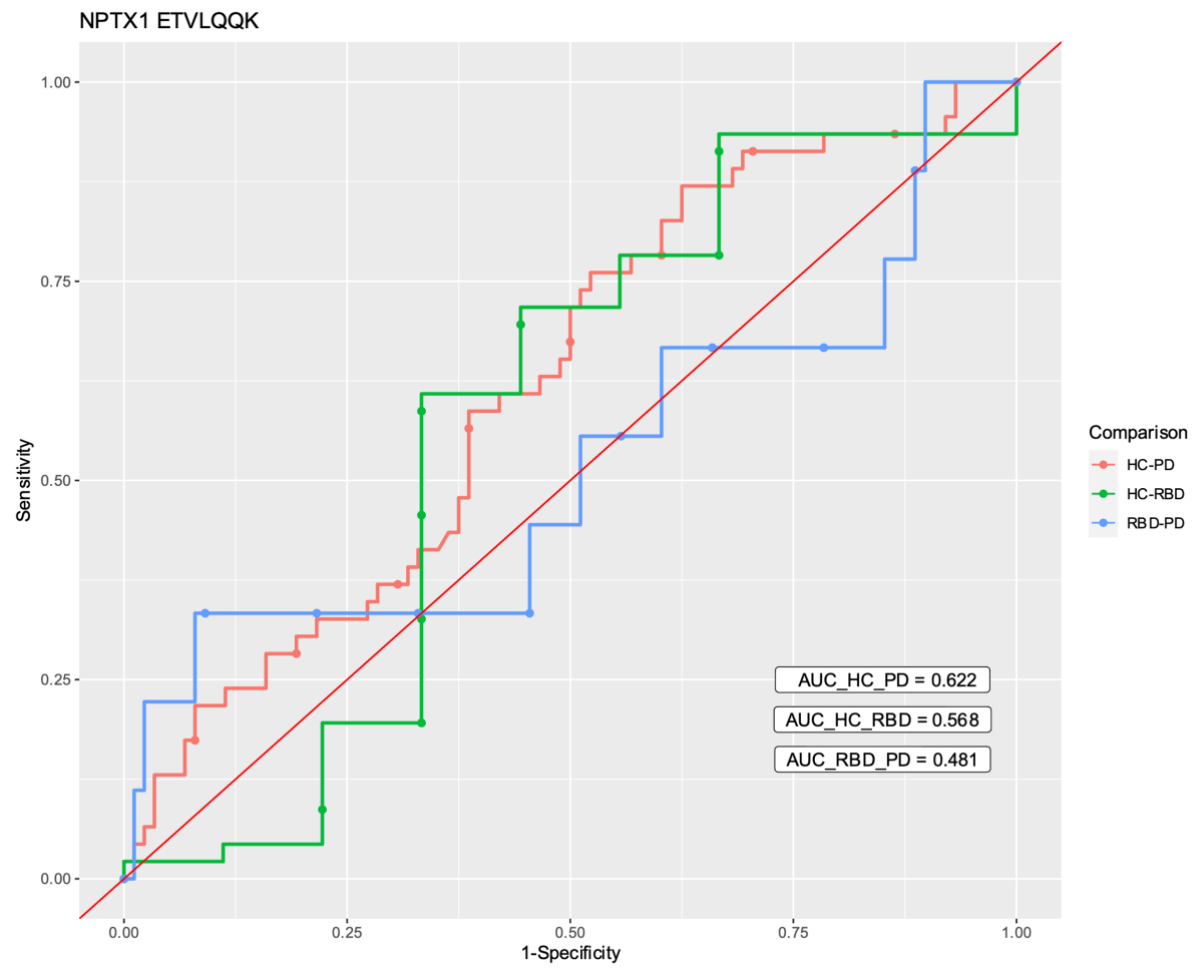

**Supplementary Figure 7i:** Results of the discrimination analysis based on receiver operating characteristics (ROC)

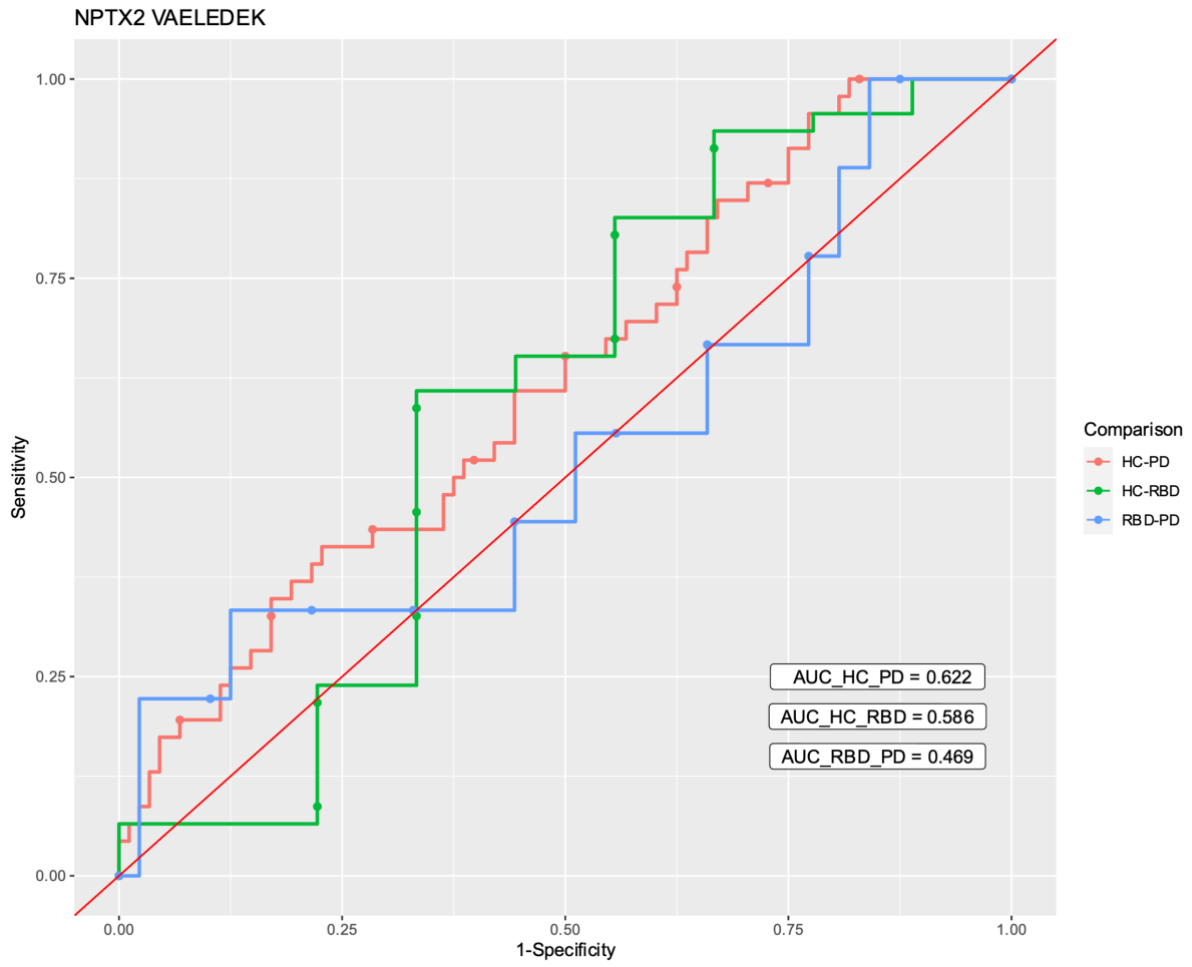

**Supplementary Figure 7j:** Results of the discrimination analysis based on receiver operating characteristics (ROC)

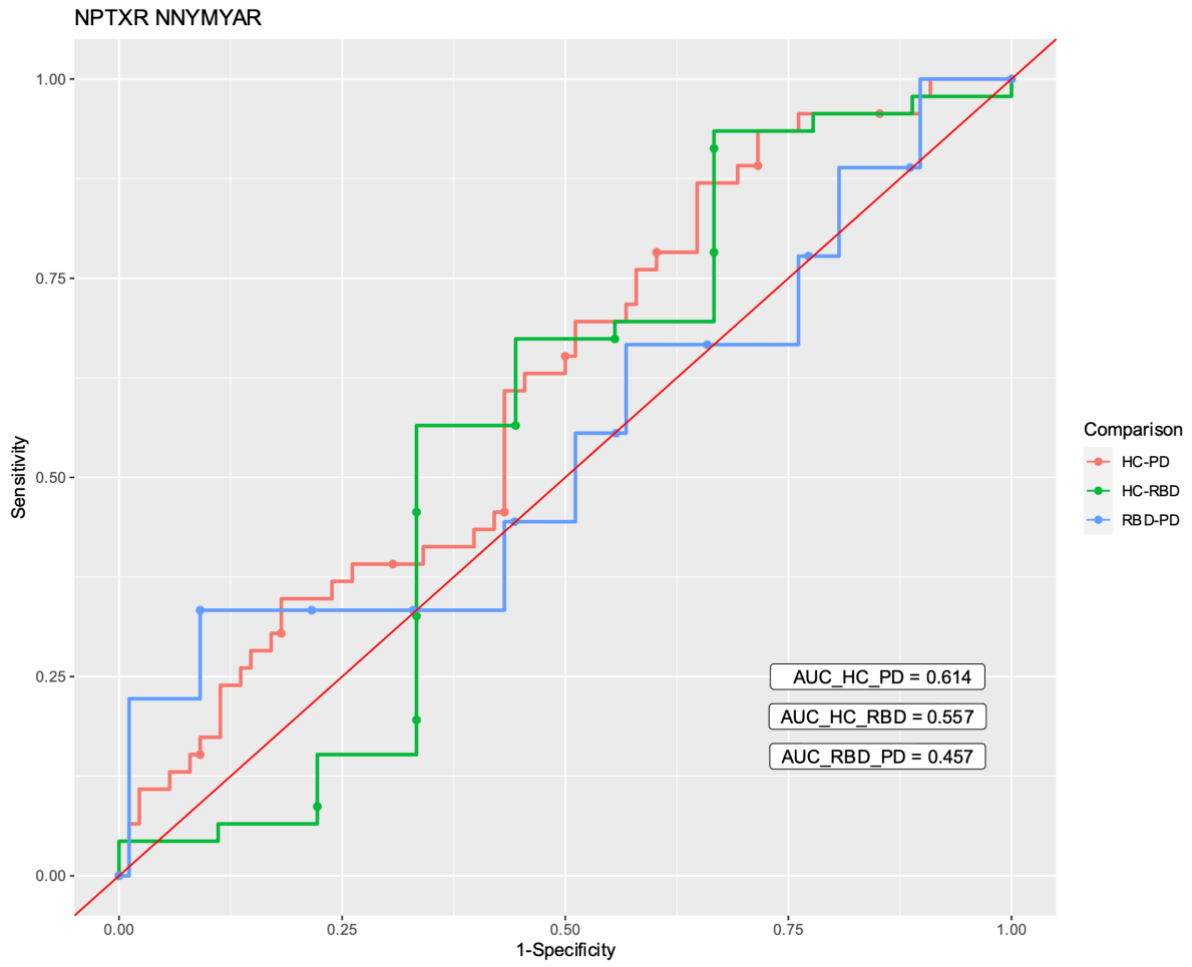

**Supplementary Figure 7k:** Results of the discrimination analysis based on receiver operating characteristics (ROC)

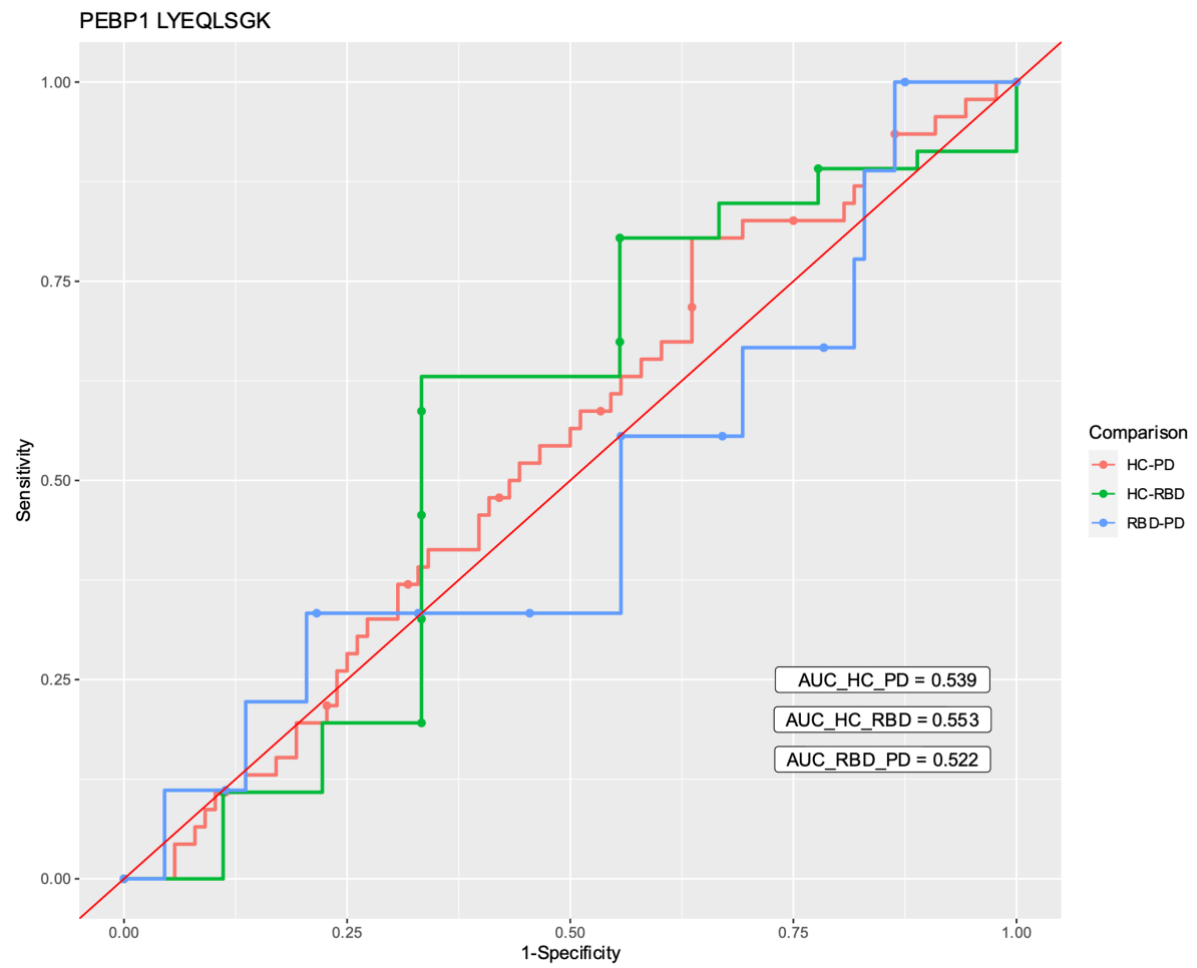

**Supplementary Figure 7I:** Results of the discrimination analysis based on receiver operating characteristics (ROC)



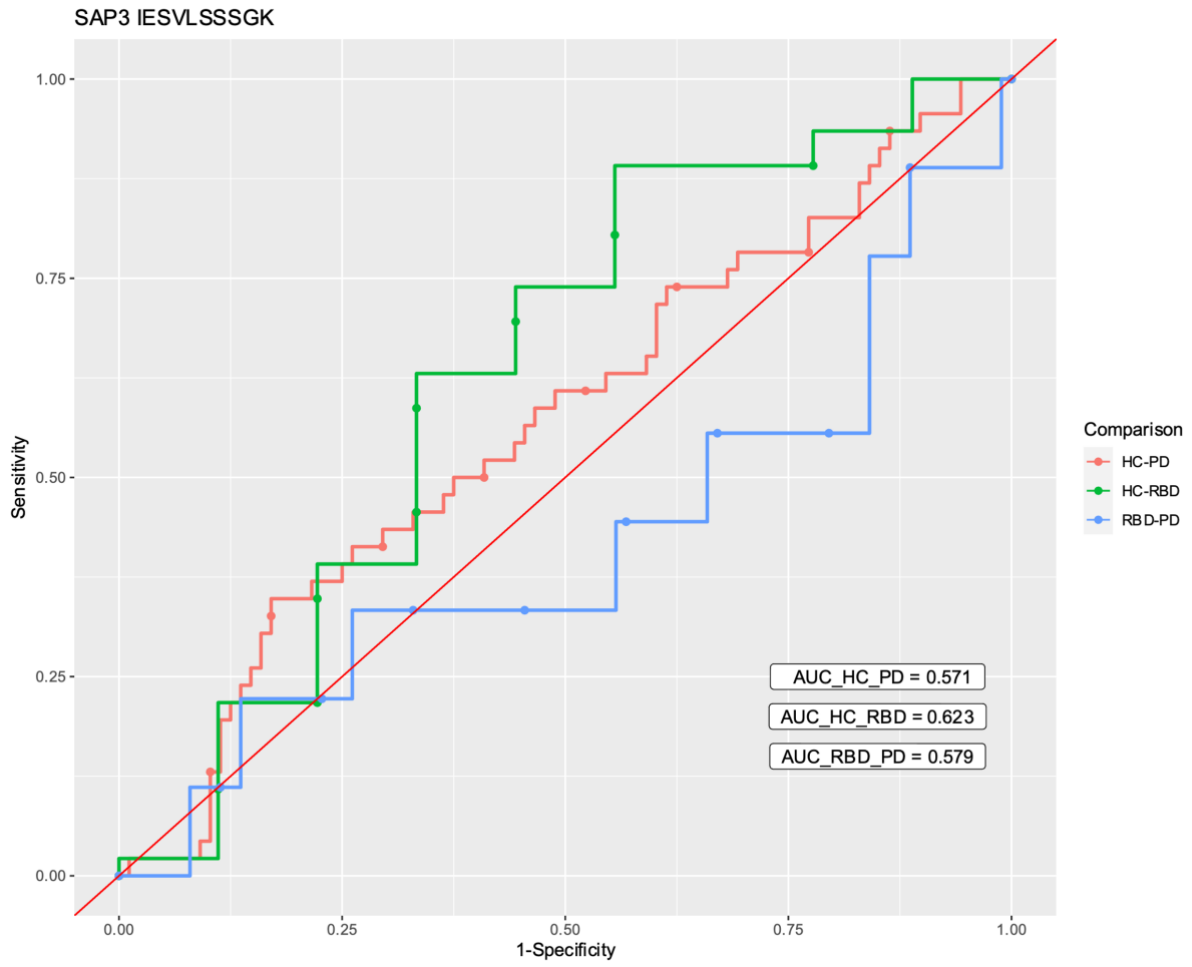

**Supplementary Figure 7m:** Results of the discrimination analysis based on receiver operating characteristics (ROC)

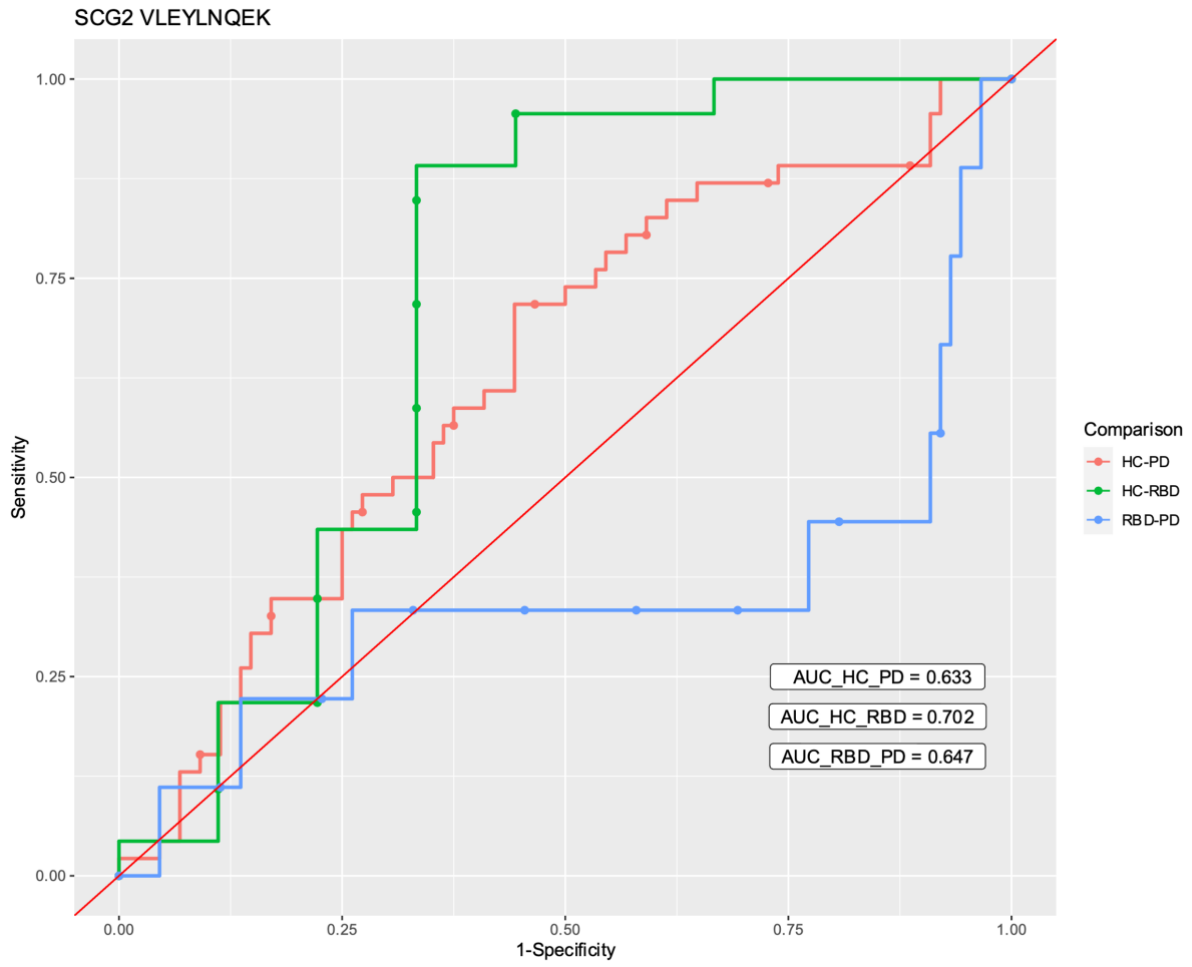

**Supplementary Figure 7n:** Results of the discrimination analysis based on receiver operating characteristics (ROC)

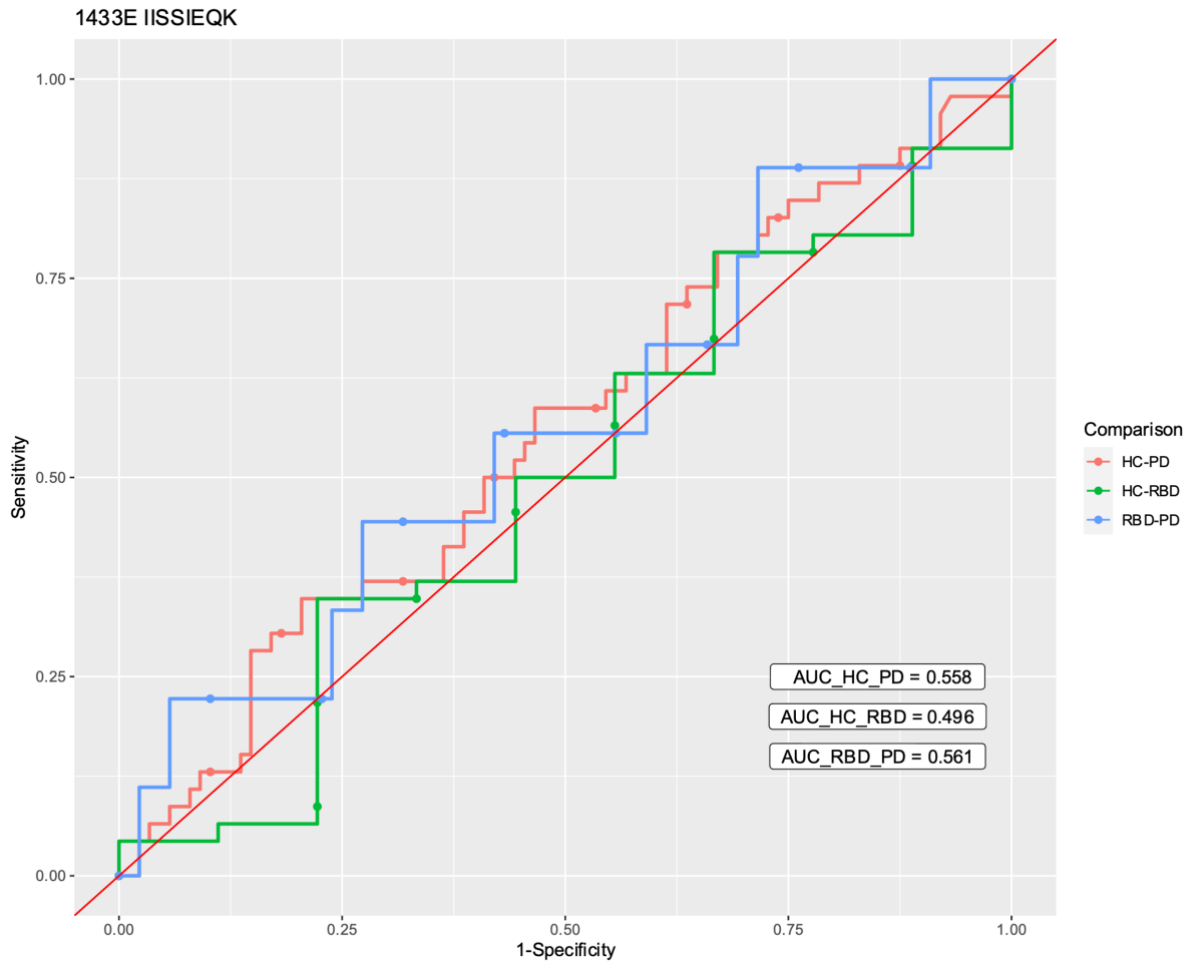

**Supplementary Figure 7o:** Results of the discrimination analysis based on receiver operating characteristics (ROC)

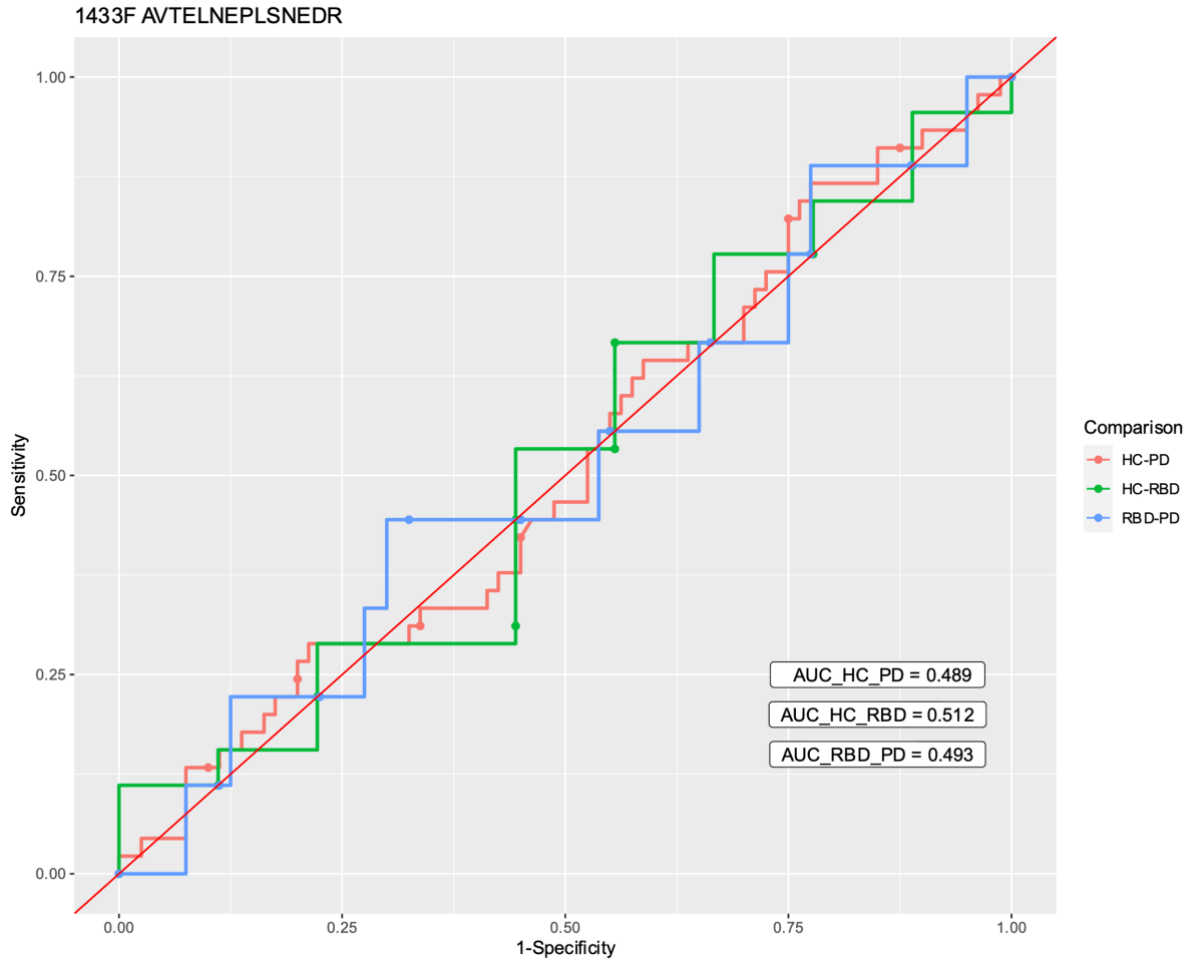

**Supplementary Figure 7p:** Results of the discrimination analysis based on receiver operating characteristics (ROC)

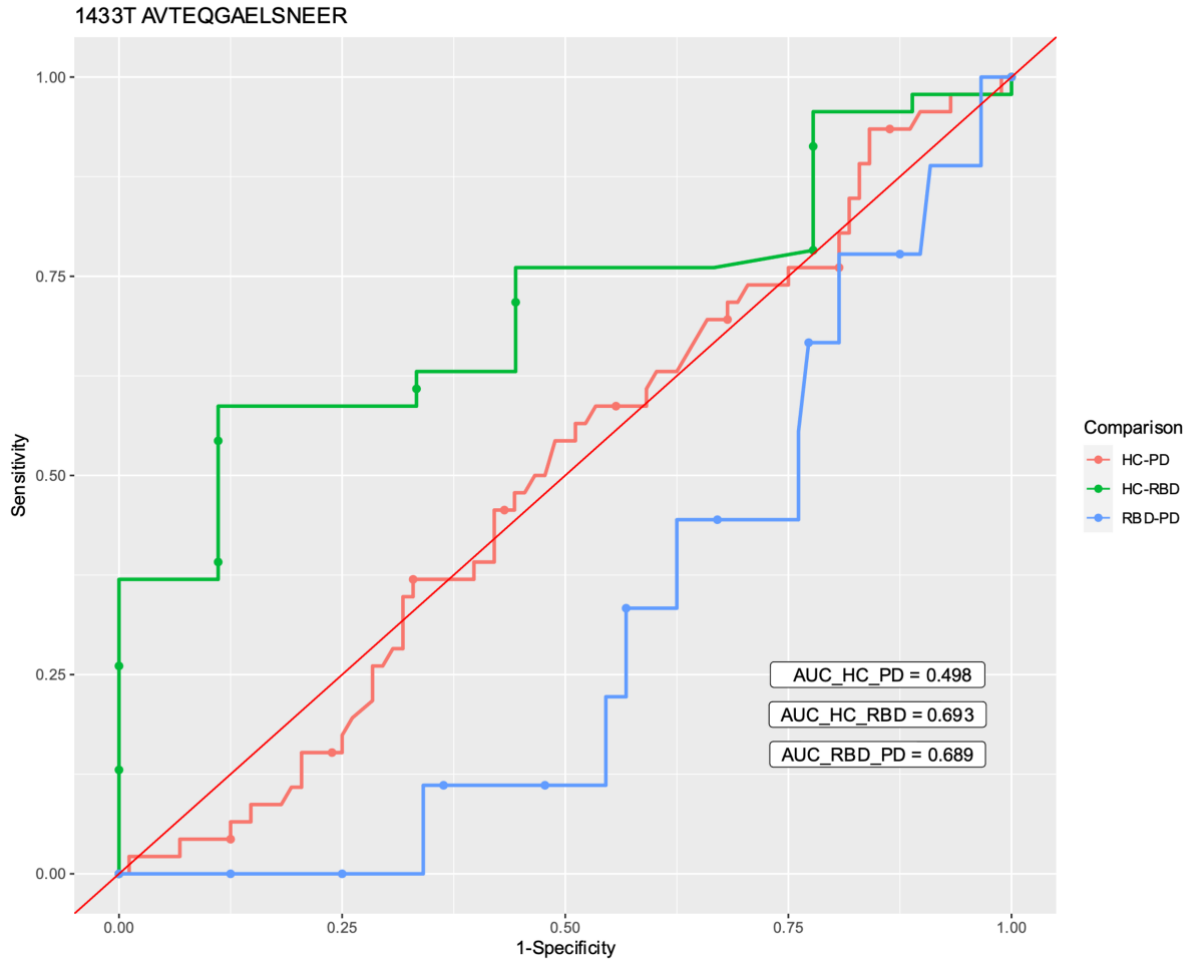

**Supplementary Figure 7q:** Results of the discrimination analysis based on receiver operating characteristics (ROC)

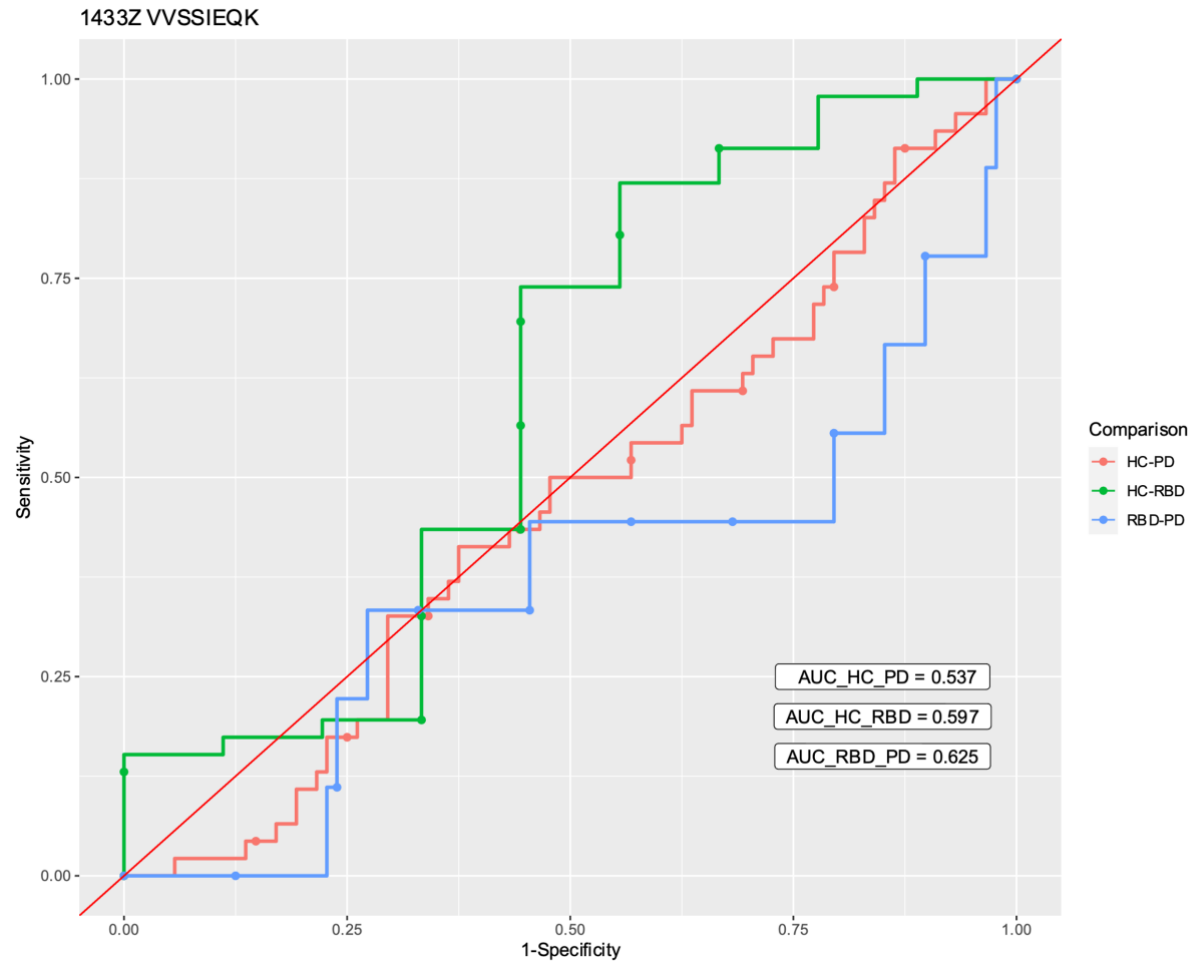

**Supplementary Figure 7r:** Results of the discrimination analysis based on receiver operating characteristics (ROC)

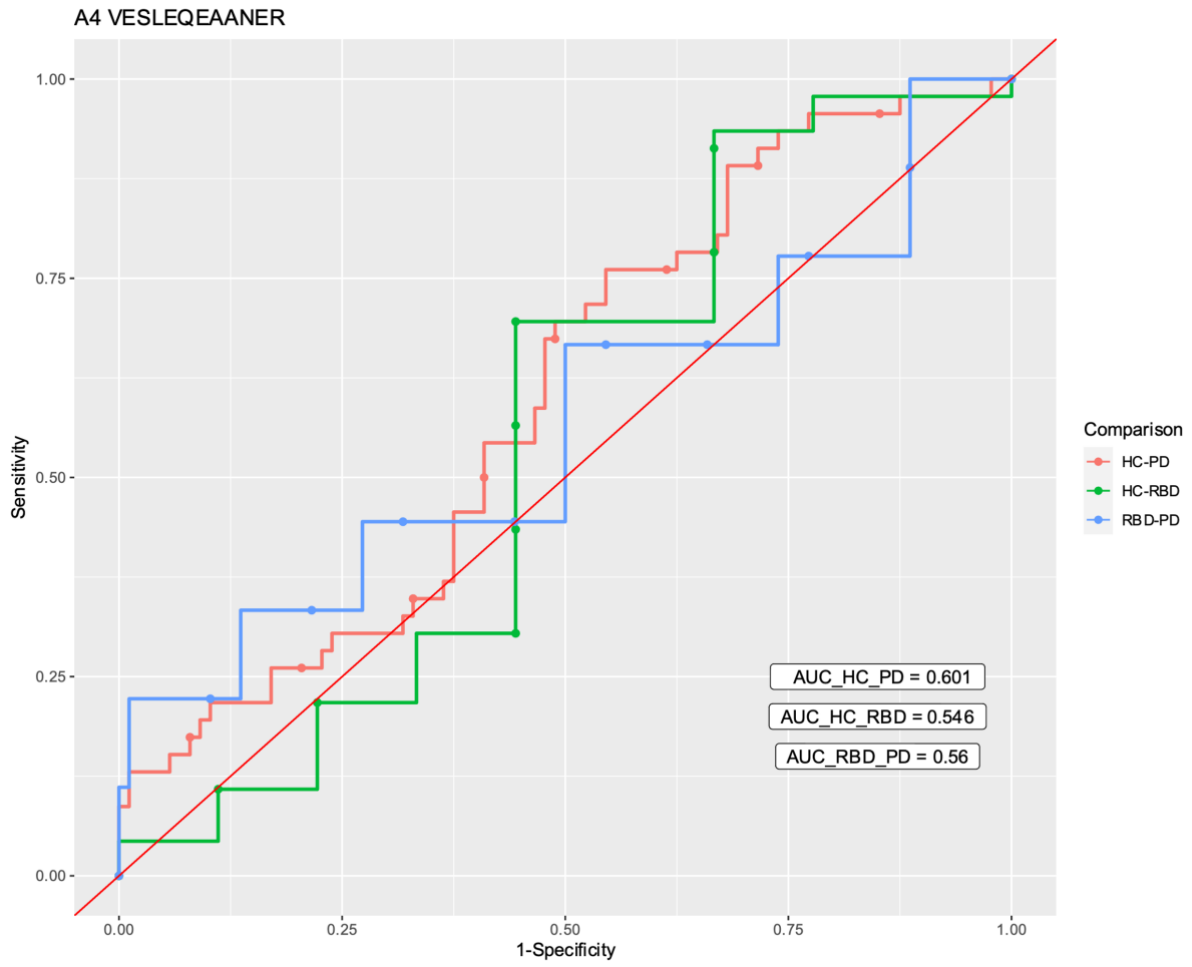

**Supplementary Figure 7s:** Results of the discrimination analysis based on receiver operating characteristics (ROC)

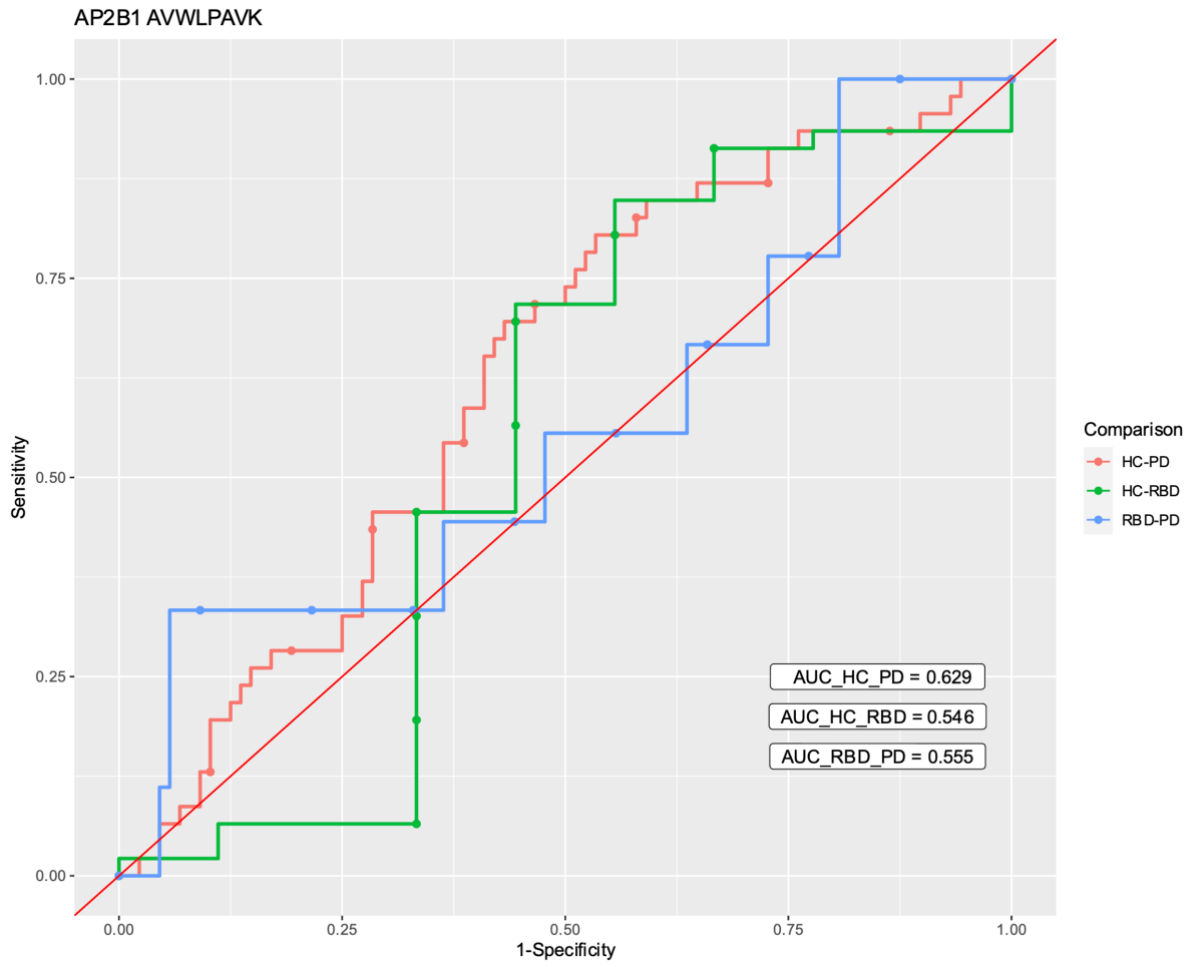

**Supplementary Figure 7t:** Results of the discrimination analysis based on receiver operating characteristics (ROC)



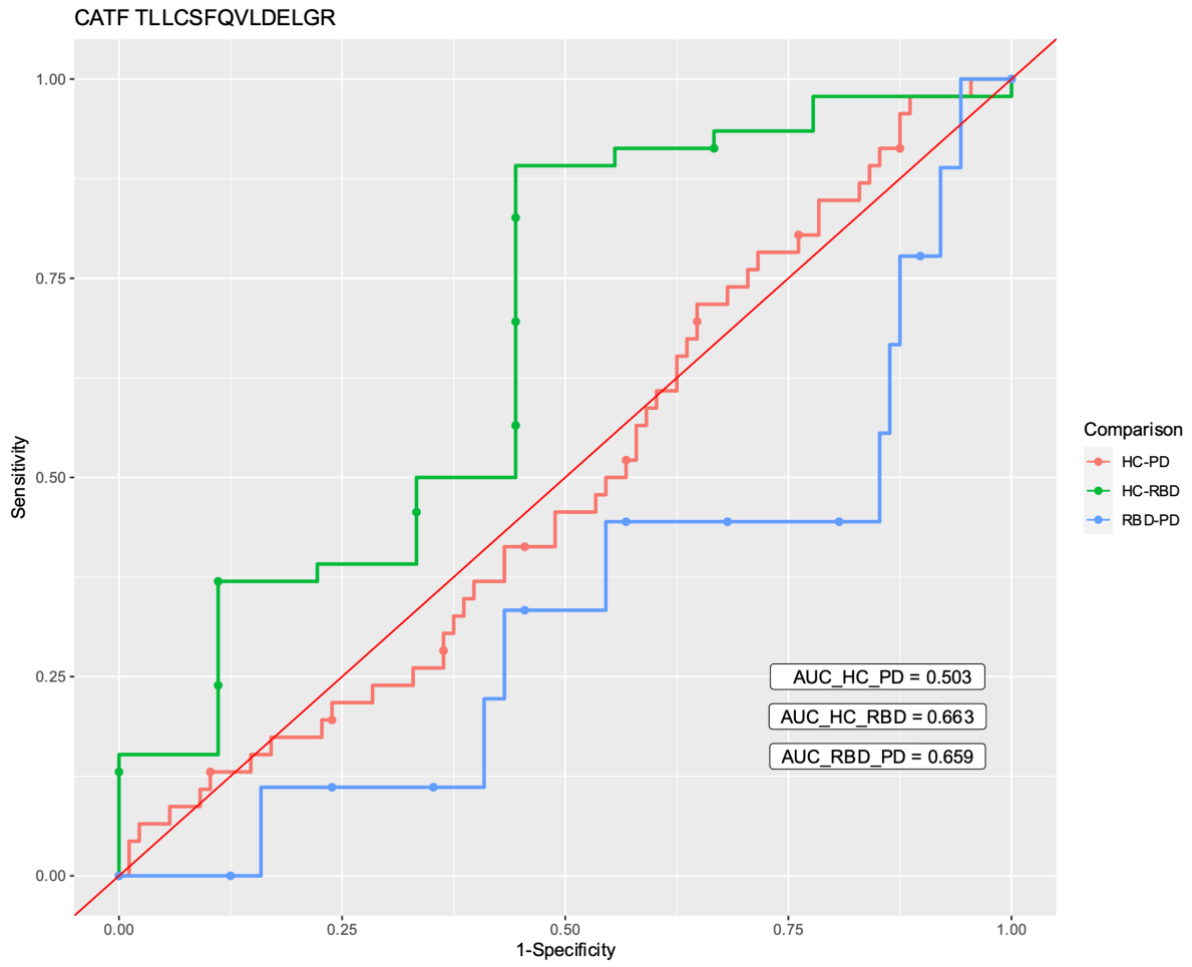

**Supplementary Figure 7u:** Results of the discrimination analysis based on receiver operating characteristics (ROC)

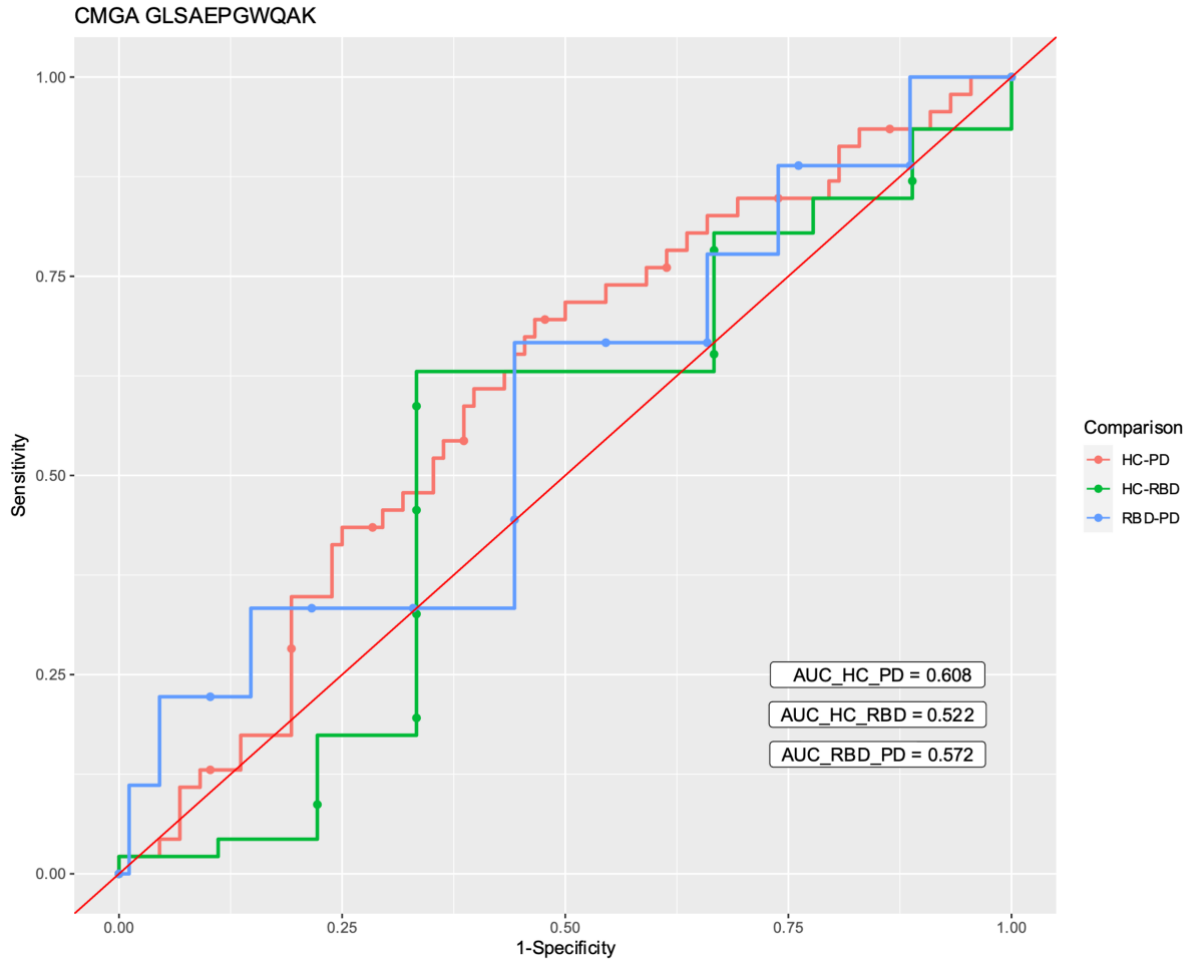

**Supplementary Figure 7v:** Results of the discrimination analysis based on receiver operating characteristics (ROC)

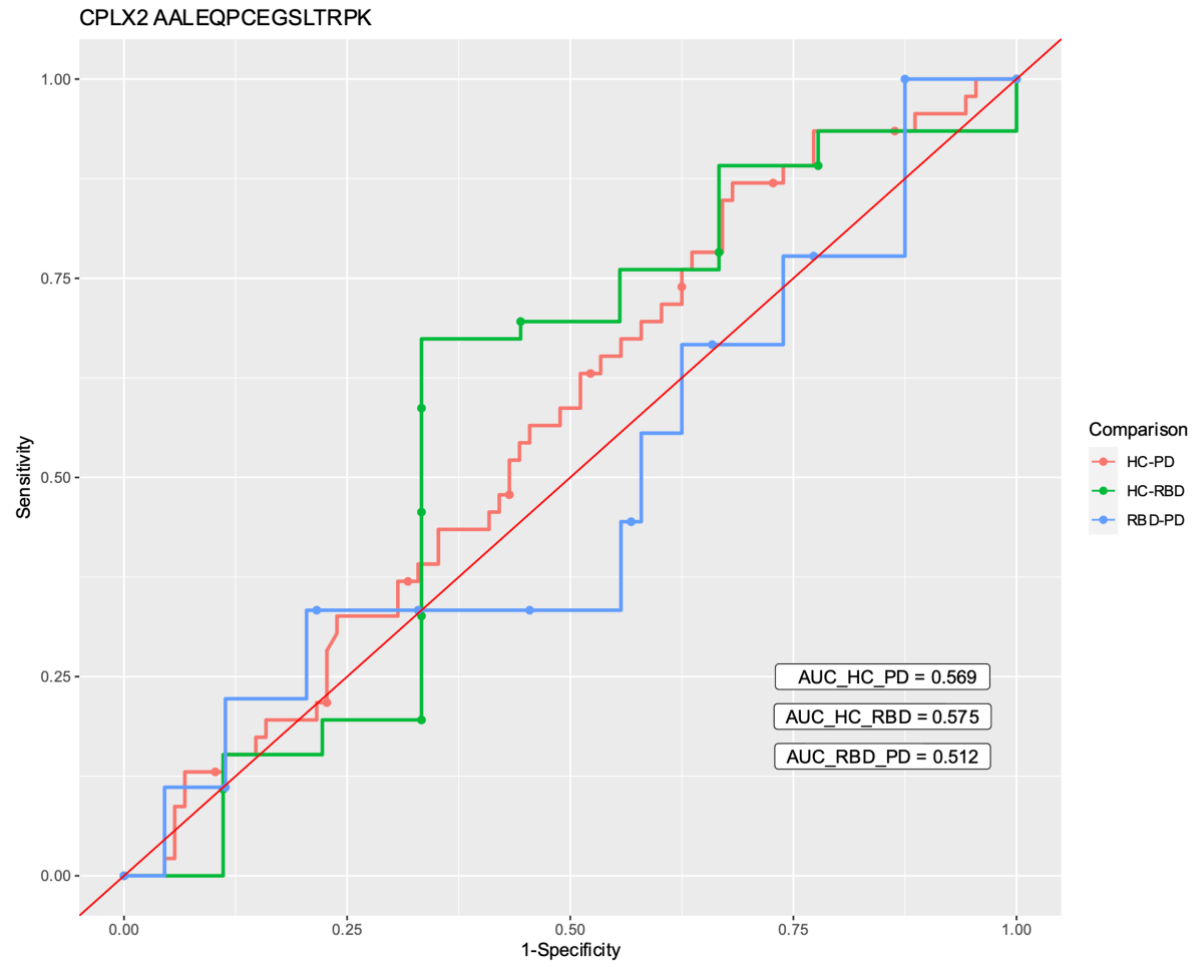

**Supplementary Figure 7w:** Results of the discrimination analysis based on receiver operating characteristics (ROC)

## Supplementary Tables

**Supplementary Table 1.** Concentrations of internal standard for each peptide as well as repeatability and intermediate precision for the study after plate correction. Bold peptide indicate peptide selected per protein for statistical analyses.

| TARGETS                      | IS CONC<br>[FMOL/MICROL] | QC <sup>1</sup>                   |                                  |
|------------------------------|--------------------------|-----------------------------------|----------------------------------|
|                              |                          | Repeatability<br>%CV <sup>3</sup> | Intermediate<br>precision<br>%CV |
| <b>1433E IISSIEQK</b>        | 0.26                     | 21.40                             | 19.71                            |
| <b>1433F AVTELNEPLSNEDR</b>  | 0.26                     | 16.48                             | 9.66                             |
| <b>1433T AVTEQGAELSNEER</b>  | 2.6                      | 25.06                             | 19.35                            |
| <b>1433Z VVSSIEQK</b>        | 0.26                     | 7.36                              | 4.71                             |
| <b>A4 VESLEQEAANER</b>       | 8.89                     | 18.24                             | 16.81                            |
| <b>AP2B1 AVWLPAVK</b>        | 0.26                     | 4.36                              | 2.36                             |
| <b>AP2B1 IQPGNPNYTLCLK</b>   | 0.82                     | 16.43                             | 14.36                            |
| <b>AP2B1 QVFLATWK</b>        | 3.53                     | 15.61                             | 12.81                            |
| <b>CATF TLLCSFQVLDELGR</b>   | 6.36                     | 24.97                             | 20.54                            |
| <b>CMGA EDSLEAGLPLQVR</b>    | 4.53                     | 9.27                              | 7.28                             |
| <b>CMGA GLSAEPGWQAK</b>      | 5.9                      | 7.09                              | 3.41                             |
| <b>CPLX2 AALEQPCEGSLTRPK</b> | 0.26                     | 9.69                              | 5.36                             |
| <b>GDIA QLICDPSYIPDR</b>     | 2.6                      | 12.38                             | 7.42                             |
| <b>LAMP2 IPLNDLFR</b>        | 3.71                     | 10.76                             | 6.36                             |
| <b>NEUG KGPGGGGPGGAGVAR</b>  | 0.26                     | 8.99                              | 2.52                             |
| <b>NPTX1 CESQSTLDPGAGEAR</b> | 2.6                      | 9.24                              | 5.45                             |
| <b>NPTX1 ETVLQQK</b>         | 2.6                      | 8.05                              | 5.36                             |
| <b>NPTX2 ETVVQQK</b>         | 2.6                      | 15.64                             | 6.46                             |
| <b>NPTX2 VAELEDEK</b>        | 0.26                     | 6.90                              | 4.70                             |
| <b>NPTXR LVEAFGGATK</b>      | 2.6                      | 26.47                             | 25.08                            |
| <b>NPTXR NNYMYAR</b>         | 2.6                      | 11.20                             | 9.72                             |
| <b>PEBP1 LYEQLSGK</b>        | 0.26                     | 6.32                              | 1.95                             |
| <b>PEBP1 NRPTSISWDGLDSGK</b> | 2.6                      | 6.85                              | 5.14                             |
| <b>SAP3 EVAGLWIK</b>         | 9.93                     | 13.12                             | 11.68                            |
| <b>SAP3 IESVLSSSGK</b>       | 6.28                     | 7.25                              | 5.33                             |
| <b>SCG2 ALEYIENLR</b>        | 3.45                     | 8.19                              | 5.72                             |
| <b>SCG2 VLEYLNQEK</b>        | 7.35                     | 6.31                              | 3.33                             |
| <b>STX1B QHSAILAAPNPDEK</b>  | 0.26                     | 20.36                             | 17.89                            |
| <b>STX7 EFGSLPTTPSEQR</b>    | 0.26                     | 13.13                             | 9.15                             |
| <b>SYUB EGVVQGVASVAEK</b>    | 0.26                     | 16.15                             | 11.92                            |
| <b>SYUG ENVVQSVTSVAEK</b>    | 0.26                     | 8.98                              | 5.40                             |
| <b>VGf AYQGVAAPFPK</b>       | 3.71                     | 6.30                              | 3.26                             |
| <b>VGf NSEPQDEGELFQGVDPR</b> | 17.1                     | 5.56                              | 2.04                             |

**Supplementary Table 2.** LC-MS/MS settings for the analysis of the synaptic and lysosomal protein panel.

|                     | <b>Parameter</b>              | <b>Setting</b>                                   |
|---------------------|-------------------------------|--------------------------------------------------|
| <b>LC</b>           | Sample injection volume       | 40 $\mu$ L                                       |
|                     | Flow-rate                     | 0.3 mL/min                                       |
|                     | Gradient                      | Broken; 5–20%B (25 min), 20–45%B (6,5 min)       |
|                     | Total cycle time              | 35 min                                           |
|                     | Mobile phase A                | 0.1% formic acid in water (v/v)                  |
|                     | Mobile phase B                | 0.1% formic acid/84% acetonitrile in water (v/v) |
| <b>Electrospray</b> | Mode                          | Positive                                         |
|                     | Gas temperature               | 220 $^{\circ}$ C                                 |
|                     | Gas flow                      | 15 L/min                                         |
|                     | Nebulizer pressure            | 40 psi                                           |
|                     | Sheath gas temperature        | 200 $^{\circ}$ C                                 |
|                     | Sheath gas flow               | 11 L/min                                         |
|                     | Capillary voltage             | 3500 V                                           |
|                     | Nozzle voltage                | 500 V                                            |
| <b>iFunnel</b>      | Mode                          | Positive                                         |
|                     | High-pressure radio frequency | 200 V                                            |
|                     | Low-pressure radio frequency  | 160 V                                            |
|                     |                               |                                                  |
| <b>MRM method</b>   | Retention time window         | 1 min                                            |
|                     | Collision energies            | Individually optimized per transition            |
|                     | Cell accelerator voltage      | Individually optimized per transition            |

**Supplementary Table 3: Results of the linear mixed models for the applied protein panel, adjusted for age, sex, time and levodopa equivalent dosage (LEDD)**

| marker               | term        | sumsq | meansq | NumDF | DenDF  | statistic | p.value | pval_temp | pval_adj | Thresh |
|----------------------|-------------|-------|--------|-------|--------|-----------|---------|-----------|----------|--------|
| 1433E IISSIEQK       | AGE         | 2.90  | 2.90   | 1.00  | 169.03 | 5.73      | 0.02    |           |          | sig    |
| 1433E IISSIEQK       | SEX         | 2.11  | 2.11   | 1,00  | 157,78 | 4.16      | 0.04    |           |          | sig    |
| 1433E IISSIEQK       | COHORT      | 0.28  | 0.28   | 1.00  | 293.16 | 0.55      | 0.46    | 0.46      | 0.78     | no-sig |
| 1433E IISSIEQK       | TIME        | 0.01  | 0.01   | 1.00  | 345.21 | 0.02      | 0.89    | 0.89      | 0.91     | no-sig |
| 1433E IISSIEQK       | log10LEDD   | 0.00  | 0.00   | 1.00  | 303.82 | 0.00      | 0.98    | 0,98      | 0.98     | no-sig |
| 1433E IISSIEQK       | COHORT:TIME | 0.33  | 0.33   | 1.00  | 314.99 | 0.65      | 0.42    | 0.42      | 0.78     | no-sig |
| 1433F AVTELNEPLSNEDR | AGE         | 0.42  | 0.42   | 1.00  | 145.88 | 1.92      | 0.17    |           |          |        |
| 1433F AVTELNEPLSNEDR | SEX         | 1.94  | 1.94   | 1.00  | 140.25 | 8.89      | 0.00    |           |          |        |
| 1433F AVTELNEPLSNEDR | COHORT      | 0.24  | 0.24   | 1.00  | 200.33 | 1.10      | 0.30    | 0.30      | 0.75     | no-sig |
| 1433F AVTELNEPLSNEDR | TIME        | 0.05  | 0.05   | 1.00  | 290.52 | 0.23      | 0.64    | 0.64      | 0.81     | no-sig |
| 1433F AVTELNEPLSNEDR | log10LEDD   | 0.03  | 0.03   | 1.00  | 224.25 | 0.12      | 0.73    | 0.73      | 0.86     | no-sig |
| 1433F AVTELNEPLSNEDR | COHORT:TIME | 0.08  | 0.08   | 1.00  | 219.52 | 0.35      | 0.56    | 0.56      | 0.81     | no-sig |
| 1433T AVTEQGAELSNEER | AGE         | 4.47  | 4.47   | 1.00  | 172.98 | 22.53     | 0.00    |           |          |        |
| 1433T AVTEQGAELSNEER | SEX         | 0.27  | 0.27   | 1.00  | 164.00 | 1.39      | 0.24    |           |          |        |
| 1433T AVTEQGAELSNEER | COHORT      | 0.02  | 0.02   | 1.00  | 275.29 | 0.09      | 0.76    | 0.76      | 0.86     | no-sig |
| 1433T AVTEQGAELSNEER | TIME        | 0.01  | 0.01   | 1.00  | 339.88 | 0.07      | 0.79    | 0.79      | 0.86     | no-sig |
| 1433T AVTEQGAELSNEER | log10LEDD   | 0.30  | 0.30   | 1.00  | 293.49 | 1.51      | 0.22    | 0.22      | 0.75     | no-sig |
| 1433T AVTEQGAELSNEER | COHORT:TIME | 0.19  | 0.19   | 1.00  | 298.83 | 0.96      | 0.33    | 0.33      | 0.75     | no-sig |
| 1433Z VVSSIEQK       | AGE         | 6.10  | 6.10   | 1.00  | 172.23 | 54.11     | 0.00    |           |          |        |
| 1433Z VVSSIEQK       | SEX         | 0.07  | 0.07   | 1.00  | 165.02 | 0.59      | 0.44    |           |          |        |
| 1433Z VVSSIEQK       | COHORT      | 0.09  | 0.09   | 1.00  | 256.43 | 0.82      | 0.37    | 0.37      | 0.76     | no-sig |
| 1433Z VVSSIEQK       | TIME        | 0.01  | 0.01   | 1.00  | 334.39 | 0.09      | 0.77    | 0.77      | 0.86     | no-sig |
| 1433Z VVSSIEQK       | log10LEDD   | 0.01  | 0.01   | 1.00  | 279.87 | 0.10      | 0.75    | 0.75      | 0.86     | no-sig |
| 1433Z VVSSIEQK       | COHORT:TIME | 0.05  | 0.05   | 1.00  | 281.09 | 0.43      | 0.51    | 0.51      | 0.81     | no-sig |
| A4 VESLEQEAANER      | AGE         | 0.82  | 0.82   | 1.00  | 189.37 | 1.82      | 0.18    |           |          |        |
| A4 VESLEQEAANER      | SEX         | 8.81  | 8.81   | 1.00  | 178.53 | 19.61     | 0.00    |           |          |        |
| A4 VESLEQEAANER      | COHORT      | 2.05  | 2.05   | 1.00  | 301.05 | 4.57      | 0.03    | 0.03      | 0.34     | no-sig |
| A4 VESLEQEAANER      | TIME        | 0.55  | 0.55   | 1.00  | 349.02 | 1.22      | 0.27    | 0.27      | 0.75     | no-sig |
| A4 VESLEQEAANER      | log10LEDD   | 0.07  | 0.07   | 1.00  | 313.19 | 0.15      | 0.70    | 0.70      | 0.86     | no-sig |
| A4 VESLEQEAANER      | COHORT:TIME | 0.29  | 0.29   | 1.00  | 321.45 | 0.64      | 0.42    | 0.42      | 0.78     | no-sig |
| AP2B1 AVWLPAVK       | AGE         | 0.79  | 0.79   | 1.00  | 162.33 | 12.18     | 0.00    |           |          |        |
| AP2B1 AVWLPAVK       | SEX         | 0.89  | 0.89   | 1.00  | 158.06 | 13.71     | 0.00    |           |          |        |
| AP2B1 AVWLPAVK       | COHORT      | 0.35  | 0.35   | 1.00  | 200.87 | 5.37      | 0.02    | 0.02      | 0.25     | no-sig |
| AP2B1 AVWLPAVK       | TIME        | 0.02  | 0.02   | 1.00  | 340.05 | 0.28      | 0.59    | 0.59      | 0.81     | no-sig |
| AP2B1 AVWLPAVK       | log10LEDD   | 0.02  | 0.02   | 1.00  | 235.60 | 0.36      | 0.55    | 0.55      | 0.81     | no-sig |
| AP2B1 AVWLPAVK       | COHORT:TIME | 0.04  | 0.04   | 1.00  | 231.52 | 0.57      | 0.45    | 0.45      | 0.78     | no-sig |
| CATF TLLCSFQVLDLGR   | AGE         | 0.20  | 0.20   | 1.00  | 181.00 | 1.10      | 0.30    |           |          |        |
| CATF TLLCSFQVLDLGR   | SEX         | 0.57  | 0.57   | 1.00  | 170.47 | 3.12      | 0.08    |           |          |        |
| CATF TLLCSFQVLDLGR   | COHORT      | 0.02  | 0.02   | 1.00  | 296.21 | 0.13      | 0.72    | 0.72      | 0.86     | no-sig |
| CATF TLLCSFQVLDLGR   | TIME        | 0.05  | 0.05   | 1.00  | 343.47 | 0.26      | 0.61    | 0.61      | 0.81     | no-sig |
| CATF TLLCSFQVLDLGR   | log10LEDD   | 0.01  | 0.01   | 1.00  | 309.62 | 0.08      | 0.78    | 0.78      | 0.86     | no-sig |
| CATF TLLCSFQVLDLGR   | COHORT:TIME | 0.15  | 0.15   | 1.00  | 318.30 | 0.80      | 0.37    | 0.37      | 0.76     | no-sig |
| CMGA GLSAEPGWQAK     | AGE         | 0.81  | 0.81   | 1.00  | 162.67 | 8.08      | 0.01    |           |          |        |

| marker                | term        | sumsq | meansq | NumDF | DenDF  | statistic | p.value | pval_temp | pval_adj | Thresh |
|-----------------------|-------------|-------|--------|-------|--------|-----------|---------|-----------|----------|--------|
| CMGA GLSAEPGWQAK      | SEX         | 1.82  | 1.82   | 1.00  | 158.44 | 18.19     | 0.00    |           |          |        |
| CMGA GLSAEPGWQAK      | COHORT      | 0.54  | 0.54   | 1.00  | 189.22 | 5.39      | 0.02    | 0.02      | 0.25     | no-sig |
| CMGA GLSAEPGWQAK      | TIME        | 0.07  | 0.07   | 1.00  | 352.99 | 0.72      | 0.40    | 0.40      | 0.78     | no-sig |
| CMGA GLSAEPGWQAK      | log10LEDD   | 0.02  | 0.02   | 1.00  | 226.10 | 0.21      | 0.65    | 0.65      | 0.81     | no-sig |
| CMGA GLSAEPGWQAK      | COHORT:TIME | 0.10  | 0.10   | 1.00  | 221.82 | 0.98      | 0.32    | 0.32      | 0.75     | no-sig |
| CPLX2 AALEQPCEGSLTRPK | AGE         | 3.75  | 3.75   | 1.00  | 182.22 | 11.70     | 0.00    |           |          |        |
| CPLX2 AALEQPCEGSLTRPK | SEX         | 2.10  | 2.10   | 1.00  | 170.88 | 6.53      | 0.01    |           |          |        |
| CPLX2 AALEQPCEGSLTRPK | COHORT      | 0.45  | 0.45   | 1.00  | 300.38 | 1.41      | 0.24    | 0.24      | 0.75     | no-sig |
| CPLX2 AALEQPCEGSLTRPK | TIME        | 0.18  | 0.18   | 1.00  | 349.26 | 0.55      | 0.46    | 0.46      | 0.78     | no-sig |
| CPLX2 AALEQPCEGSLTRPK | log10LEDD   | 0.08  | 0.08   | 1.00  | 312.14 | 0.25      | 0.62    | 0.62      | 0.81     | no-sig |
| CPLX2 AALEQPCEGSLTRPK | COHORT:TIME | 0.07  | 0.07   | 1.00  | 321.80 | 0.21      | 0.64    | 0.64      | 0.81     | no-sig |
| GDIA QLICDPSYIPDR     | AGE         | 4.31  | 4.31   | 1.00  | 197.78 | 12.98     | 0.00    |           |          |        |
| GDIA QLICDPSYIPDR     | SEX         | 0.93  | 0.93   | 1.00  | 180.15 | 2.79      | 0.10    |           |          |        |
| GDIA QLICDPSYIPDR     | COHORT      | 0.36  | 0.36   | 1.00  | 332.98 | 1.07      | 0.30    | 0.30      | 0.75     | no-sig |
| GDIA QLICDPSYIPDR     | TIME        | 0.51  | 0.51   | 1.00  | 356.73 | 1.53      | 0.22    | 0.22      | 0.75     | no-sig |
| GDIA QLICDPSYIPDR     | log10LEDD   | 0.19  | 0.19   | 1.00  | 337.22 | 0.58      | 0.45    | 0.45      | 0.78     | no-sig |
| GDIA QLICDPSYIPDR     | COHORT:TIME | 0.01  | 0.01   | 1.00  | 348.24 | 0.03      | 0.86    | 0.86      | 0.89     | no-sig |
| LAMP2 IPLNDLFR        | AGE         | 0.69  | 0.69   | 1.00  | 151.58 | 4.50      | 0.04    |           |          |        |
| LAMP2 IPLNDLFR        | SEX         | 1.27  | 1.27   | 1.00  | 145.56 | 8.31      | 0.00    |           |          |        |
| LAMP2 IPLNDLFR        | COHORT      | 0.29  | 0.29   | 1.00  | 214.20 | 1.89      | 0.17    | 0.17      | 0.75     | no-sig |
| LAMP2 IPLNDLFR        | TIME        | 0.20  | 0.20   | 1.00  | 293.60 | 1.32      | 0.25    | 0.25      | 0.75     | no-sig |
| LAMP2 IPLNDLFR        | log10LEDD   | 0.10  | 0.10   | 1.00  | 235.19 | 0.64      | 0.43    | 0.43      | 0.78     | no-sig |
| LAMP2 IPLNDLFR        | COHORT:TIME | 0.28  | 0.28   | 1.00  | 233.80 | 1.84      | 0.18    | 0.18      | 0.75     | no-sig |
| NEUG KGPGPGGGAGVAR    | AGE         | 0.62  | 0.62   | 1.00  | 164.46 | 11.62     | 0.00    |           |          |        |
| NEUG KGPGPGGGAGVAR    | SEX         | 1.43  | 1.43   | 1.00  | 159.96 | 26.93     | 0.00    |           |          |        |
| NEUG KGPGPGGGAGVAR    | COHORT      | 0.39  | 0.39   | 1.00  | 182.21 | 7.24      | 0.01    | 0.01      | 0.12     | no-sig |
| NEUG KGPGPGGGAGVAR    | TIME        | 0.12  | 0.12   | 1.00  | 363.86 | 2.16      | 0.14    | 0.14      | 0.75     | no-sig |
| NEUG KGPGPGGGAGVAR    | log10LEDD   | 0.01  | 0.01   | 1.00  | 220.70 | 0.09      | 0.76    | 0.76      | 0.86     | no-sig |
| NEUG KGPGPGGGAGVAR    | COHORT:TIME | 0.13  | 0.13   | 1.00  | 217.57 | 2.37      | 0.12    | 0.12      | 0.75     | no-sig |
| NPTX1 ETVLQQK         | AGE         | 0.23  | 0.23   | 1.00  | 162.47 | 2.94      | 0.09    |           |          |        |
| NPTX1 ETVLQQK         | SEX         | 1.26  | 1.26   | 1.00  | 158.28 | 16.00     | 0.00    |           |          |        |
| NPTX1 ETVLQQK         | COHORT      | 0.59  | 0.59   | 1.00  | 198.99 | 7.48      | 0.01    | 0.01      | 0.12     | no-sig |
| NPTX1 ETVLQQK         | TIME        | 0.02  | 0.02   | 1.00  | 343.40 | 0.25      | 0.61    | 0.61      | 0.81     | no-sig |
| NPTX1 ETVLQQK         | log10LEDD   | 0.01  | 0.01   | 1.00  | 234.69 | 0.15      | 0.70    | 0.70      | 0.86     | no-sig |
| NPTX1 ETVLQQK         | COHORT:TIME | 0.02  | 0.02   | 1.00  | 230.68 | 0.22      | 0.64    | 0.64      | 0.81     | no-sig |
| NPTX2 VAELEDEK        | AGE         | 0.03  | 0.03   | 1.00  | 170.72 | 0.14      | 0.71    |           |          |        |
| NPTX2 VAELEDEK        | SEX         | 3.20  | 3.20   | 1.00  | 164.84 | 15.44     | 0.00    |           |          |        |
| NPTX2 VAELEDEK        | COHORT      | 1.99  | 1.99   | 1.00  | 239.52 | 9.60      | 0.00    | 0.00      | 0.11     | no-sig |
| NPTX2 VAELEDEK        | TIME        | 0.20  | 0.20   | 1.00  | 331.00 | 0.98      | 0.32    | 0.32      | 0.75     | no-sig |
| NPTX2 VAELEDEK        | log10LEDD   | 0.02  | 0.02   | 1.00  | 266.17 | 0.09      | 0.77    | 0.77      | 0.86     | no-sig |
| NPTX2 VAELEDEK        | COHORT:TIME | 0.41  | 0.41   | 1.00  | 264.73 | 2.00      | 0.16    | 0.16      | 0.75     | no-sig |
| NPTXR NNYMYAR         | AGE         | 0.41  | 0.41   | 1.00  | 165.46 | 2.90      | 0.09    |           |          |        |
| NPTXR NNYMYAR         | SEX         | 2.68  | 2.68   | 1.00  | 160.98 | 19.10     | 0.00    |           |          |        |
| NPTXR NNYMYAR         | COHORT      | 1.21  | 1.21   | 1.00  | 210.25 | 8.63      | 0.00    | 0.00      | 0.11     | no-sig |
| NPTXR NNYMYAR         | TIME        | 0.17  | 0.17   | 1.00  | 337.52 | 1.24      | 0.27    | 0.27      | 0.75     | no-sig |

| marker                | term        | sumsq | meansq | NumDF | DenDF  | statistic | p.value | pval_temp | pval_adj | Thresh |
|-----------------------|-------------|-------|--------|-------|--------|-----------|---------|-----------|----------|--------|
| NPTXR NNYMYAR         | log10LEDD   | 0.05  | 0.05   | 1.00  | 244.13 | 0.36      | 0.55    | 0.55      | 0.81     | no-sig |
| NPTXR NNYMYAR         | COHORT:TIME | 0.04  | 0.04   | 1.00  | 240.30 | 0.25      | 0.62    | 0.62      | 0.81     | no-sig |
| PEBP1 LYEQLSGK        | AGE         | 3.51  | 3.51   | 1.00  | 170.34 | 34.60     | 0.00    |           |          |        |
| PEBP1 LYEQLSGK        | SEX         | 0.47  | 0.47   | 1.00  | 163.02 | 4.68      | 0.03    |           |          |        |
| PEBP1 LYEQLSGK        | COHORT      | 0.03  | 0.03   | 1.00  | 256.19 | 0.33      | 0.57    | 0.57      | 0.81     | no-sig |
| PEBP1 LYEQLSGK        | TIME        | 0.14  | 0.14   | 1.00  | 334.10 | 1.42      | 0.23    | 0.23      | 0.75     | no-sig |
| PEBP1 LYEQLSGK        | log10LEDD   | 0.04  | 0.04   | 1.00  | 279.50 | 0.37      | 0.55    | 0.55      | 0.81     | no-sig |
| PEBP1 LYEQLSGK        | COHORT:TIME | 0.01  | 0.01   | 1.00  | 281.01 | 0.06      | 0.81    | 0.81      | 0.88     | no-sig |
| SAP3 IESVLSSSGK       | AGE         | 1.54  | 1.54   | 1.00  | 175.21 | 11.19     | 0.00    |           |          |        |
| SAP3 IESVLSSSGK       | SEX         | 0.40  | 0.40   | 1.00  | 167.92 | 2.94      | 0.09    |           |          |        |
| SAP3 IESVLSSSGK       | COHORT      | 0.04  | 0.04   | 1.00  | 255.19 | 0.31      | 0.58    | 0.58      | 0.81     | no-sig |
| SAP3 IESVLSSSGK       | TIME        | 0.14  | 0.14   | 1.00  | 333.36 | 1.03      | 0.31    | 0.31      | 0.75     | no-sig |
| SAP3 IESVLSSSGK       | log10LEDD   | 0.07  | 0.07   | 1.00  | 279.47 | 0.48      | 0.49    | 0.49      | 0,81     | no-sig |
| SAP3 IESVLSSSGK       | COHORT:TIME | 0.17  | 0.17   | 1.00  | 278.97 | 1.21      | 0.27    | 0.27      | 0.75     | no-sig |
| SCG2 VLEYLNQEK        | AGE         | 0.51  | 0.51   | 1.00  | 160.45 | 3.58      | 0.06    |           |          |        |
| SCG2 VLEYLNQEK        | SEX         | 1.81  | 1.81   | 1.00  | 154.98 | 12.81     | 0.00    |           |          |        |
| SCG2 VLEYLNQEK        | COHORT      | 1.04  | 1.04   | 1.00  | 224.03 | 7.34      | 0.01    | 0.01      | 0.12     | no-sig |
| SCG2 VLEYLNQEK        | TIME        | 0.42  | 0.42   | 1.00  | 329.06 | 3.00      | 0.08    | 0.08      | 0.70     | no-sig |
| SCG2 VLEYLNQEK        | log10LEDD   | 0.13  | 0.13   | 1.00  | 254.37 | 0.94      | 0.33    | 0.33      | 0.75     | no-sig |
| SCG2 VLEYLNQEK        | COHORT:TIME | 0.19  | 0.19   | 1.00  | 251.98 | 1.34      | 0.25    | 0.25      | 0.75     | no-sig |
| STX1B QHSAILAAPNPDEK  | AGE         | 2.55  | 2.55   | 1.00  | 172.38 | 13.75     | 0.00    |           |          |        |
| STX1B QHSAILAAPNPDEK  | SEX         | 1.60  | 1.60   | 1.00  | 164.67 | 8.63      | 0.00    |           |          |        |
| STX1B QHSAILAAPNPDEK  | COHORT      | 0.52  | 0.52   | 1.00  | 257.63 | 2.79      | 0.10    | 0.10      | 0.73     | no-sig |
| STX1B QHSAILAAPNPDEK  | TIME        | 0.07  | 0.07   | 1.00  | 332.54 | 0.40      | 0.53    | 0.53      | 0.81     | no-sig |
| STX1B QHSAILAAPNPDEK  | log10LEDD   | 0.01  | 0.01   | 1.00  | 278.74 | 0.04      | 0.85    | 0.85      | 0.89     | no-sig |
| STX1B QHSAILAAPNPDEK  | COHORT:TIME | 0.13  | 0.13   | 1.00  | 280.27 | 0.70      | 0.40    | 0.40      | 0.78     | no-sig |
| STX7 EFGSLPTTPSEQR    | AGE         | 5.11  | 5.11   | 1.00  | 189.25 | 18.29     | 0.00    |           |          |        |
| STX7 EFGSLPTTPSEQR    | SEX         | 1.21  | 1.21   | 1.00  | 177.34 | 4.32      | 0.04    |           |          |        |
| STX7 EFGSLPTTPSEQR    | COHORT      | 0.43  | 0.43   | 1.00  | 306.28 | 1.53      | 0.22    | 0.22      | 0.75     | no-sig |
| STX7 EFGSLPTTPSEQR    | TIME        | 0.01  | 0.01   | 1.00  | 350.63 | 0.03      | 0.86    | 0.86      | 0.89     | no-sig |
| STX7 EFGSLPTTPSEQR    | log10LEDD   | 0.00  | 0.00   | 1.00  | 317.16 | 0.01      | 0.92    | 0.92      | 0.93     | no-sig |
| STX7 EFGSLPTTPSEQR    | COHORT:TIME | 0.23  | 0.23   | 1.00  | 326.60 | 0.84      | 0.36    | 0.36      | 0.76     | no-sig |
| SYUB EGVVQGVASVAEK    | AGE         | 2.46  | 2.46   | 1.00  | 167.67 | 16.54     | 0.00    |           |          |        |
| SYUB EGVVQGVASVAEK    | SEX         | 1.65  | 1.65   | 1.00  | 161.48 | 11.10     | 0.00    |           |          |        |
| SYUB EGVVQGVASVAEK    | COHORT      | 0.21  | 0.21   | 1.00  | 239.30 | 1.43      | 0.23    | 0.23      | 0.75     | no-sig |
| SYUB EGVVQGVASVAEK    | TIME        | 0.60  | 0.60   | 1.00  | 328.93 | 4.01      | 0.05    | 0.05      | 0.42     | no-sig |
| SYUB EGVVQGVASVAEK    | log10LEDD   | 0.15  | 0.15   | 1.00  | 265.44 | 0.99      | 0.32    | 0.32      | 0.75     | no-sig |
| SYUB EGVVQGVASVAEK    | COHORT:TIME | 0.22  | 0.22   | 1.00  | 264.22 | 1.51      | 0.22    | 0.22      | 0.75     | no-sig |
| SYUG ENVVQSVTSVAEK    | AGE         | 4.42  | 4.42   | 1.00  | 172.02 | 23.01     | 0.00    |           |          |        |
| SYUG ENVVQSVTSVAEK    | SEX         | 0.59  | 0.59   | 1.00  | 163.06 | 3.09      | 0.08    |           |          |        |
| SYUG ENVVQSVTSVAEK    | COHORT      | 0.01  | 0.01   | 1.00  | 272.88 | 0.04      | 0.85    | 0.85      | 0.89     | no-sig |
| SYUG ENVVQSVTSVAEK    | TIME        | 0.17  | 0.17   | 1.00  | 338.37 | 0.91      | 0.34    | 0.34      | 0.75     | no-sig |
| SYUG ENVVQSVTSVAEK    | log10LEDD   | 0.09  | 0.09   | 1.00  | 291.79 | 0.46      | 0.50    | 0.50      | 0.81     | no-sig |
| SYUG ENVVQSVTSVAEK    | COHORT:TIME | 0.41  | 0.41   | 1.00  | 296.59 | 2.15      | 0.14    | 0.14      | 0.75     | no-sig |
| VGf NSEPQDEGELFQGVDPR | AGE         | 0.08  | 0.08   | 1.00  | 159.26 | 1.56      | 0.21    |           |          |        |



| marker                | term        | sumsq | meansq | NumDF | DenDF  | statistic | p.value | pval_temp | pval_adj | Thresh |
|-----------------------|-------------|-------|--------|-------|--------|-----------|---------|-----------|----------|--------|
| VGF NSEPQDEGELFQGVDPR | SEX         | 0.87  | 0.87   | 1.00  | 154.73 | 16.28     | 0.00    |           |          |        |
| VGF NSEPQDEGELFQGVDPR | COHORT      | 0.50  | 0.50   | 1.00  | 174.43 | 9.33      | 0.00    | 0.00      | 0.11     | no-sig |
| VGF NSEPQDEGELFQGVDPR | TIME        | 0.13  | 0.13   | 1.00  | 353.74 | 2.37      | 0.12    | 0.12      | 0.75     | no-sig |
| VGF NSEPQDEGELFQGVDPR | log10LEDD   | 0.07  | 0.07   | 1.00  | 210.19 | 1.36      | 0.25    | 0.25      | 0.75     | no-sig |
| VGF NSEPQDEGELFQGVDPR | COHORT:TIME | 0.07  | 0.07   | 1.00  | 207.59 | 1.34      | 0.25    | 0.25      | 0.75     | no-sig |

**Supplementary Table 4:** Data on the subjects in the longitudinal model. For some subjects, no baseline samples was available. SAA data displays positive and negative results of the available samples Abbreviations: PD = Parkinson's Disease, HC = healthy control, iRBD = isolated REM sleep behavior disorder, n= number, sd = standard deviation, CSF= cerebrospinal fluid, MDS-UPDRS = Movement Disorders Society – United Parkinson's Disease Rating Scale, MMSE= Mini-Mental-State Examination, MoCa= Montreal Cognitive Assessment Score

|                                                                      | HC (N=58)                        | PD (N=104)                         | RBD (N=12)                       | Adj. p-values |
|----------------------------------------------------------------------|----------------------------------|------------------------------------|----------------------------------|---------------|
| <b>Sex</b>                                                           |                                  |                                    |                                  | 0.176         |
| - female                                                             | 18 (31.0%)                       | 34 (32.7%)                         | 7 (58.3%)                        |               |
| - male                                                               | 40 (69.0%)                       | 70 (67.3%)                         | 5 (41.7%)                        |               |
| <b>Age</b>                                                           |                                  |                                    |                                  | 0.692         |
| - Mean (SD)                                                          | 67.5 (7.23)                      | 67.12 (9.74)                       | 65.3 (8.52)                      |               |
| <b>BMI</b>                                                           |                                  |                                    |                                  | 0.072         |
| - Mean (SD)                                                          | 26.97 (4.45)                     | 28.0 (4.61)                        | 25.6 (3.68)                      |               |
| <b>MDS-UPDRS-III</b>                                                 |                                  |                                    |                                  | < 0.001**     |
| - Mean (SD)                                                          | 1.07 (1.89)                      | 25.99 (12.79)                      | 2.000 (2.56)                     |               |
| <b>MDS-UPDRS total score</b>                                         |                                  |                                    |                                  | < 0.001**     |
| - Mean (SD)                                                          | 6.07 (6.69)                      | 45.98 (21.05)                      | 18.75 (7.74)                     |               |
| <b>Hoehn &amp; Yahr</b>                                              |                                  |                                    |                                  | < 0.001**     |
| - Mean (SD)                                                          | 0.02 (0.13)                      | 2.098 (0.74)                       | 0.08 (0.29)                      |               |
| <b>MMSE total score</b>                                              |                                  |                                    |                                  | 0.007         |
| - Mean (SD)                                                          | 28.67 (1.37)                     | 28.00 (1.65)                       | 28.833 (1.27)                    |               |
| <b>MoCA total score</b>                                              |                                  |                                    |                                  | 0.02*         |
| - Mean (SD)                                                          | 25.76 (2.54)                     | 24.53 (3.32)                       | 27.42 (2.07)                     |               |
| <b>CSF albumin quotient</b>                                          |                                  |                                    |                                  | 0.080         |
| - Mean (SD)                                                          | 7.39 (3.18)                      | 8.42 (3.84)                        | 6.58 (1.64)                      |               |
| <b>CSF <math>\beta</math>-amyloid (A<math>\beta</math>)</b>          |                                  |                                    |                                  | 0.154         |
| - Mean (SD)                                                          | 851.626 (197.58)                 | 883.72 (233.42)                    | 673.667 (65.68)                  |               |
| <b>CSF phospho-tau protein (pTau)</b>                                |                                  |                                    |                                  | 0.066         |
| - Mean (SD)                                                          | 44.966 (16.72)                   | 42.192 (16.33)                     | 27.767 (3.36)                    |               |
| <b>CSF Total tau protein (tTau)</b>                                  |                                  |                                    |                                  | 0.099         |
| - Mean (SD)                                                          | 256.842 (122.39)                 | 235.63 (115.46)                    | 159.000 (16.82)                  |               |
| <b>CSF neurofilament light chains (NfL)</b>                          |                                  |                                    |                                  | < 0.001**     |
| - Mean (SD)                                                          | 582.15 (252.59)                  | 799.90 (626.59)                    | 368.70 (88.29)                   | < 0.001**     |
| <b><math>\alpha</math>-synuclein seeding aggregation assay (SAA)</b> | 0/50 (+/-) out of 50 CSF samples | 87/13 (+/-) out of 100 CSF samples | 11/1 (+/-) out of 12 CSF samples | N/A           |

**Supplementary Table 5:** Neuronal  $\alpha$ -synuclein-disease integrated staging system (NSD-ISS) based on the available clinical,  $\alpha$ -synuclein seeding aggregation assay (SAA) and DAT-SPECT data. Applying the NSD-ISS categorized four subjects that in stage NSD2A (iRBD, S+ D-), six subjects in stage NSD2B (iRBD, S+ D+) and 78 subjects fulfilling the criteria for stage 4 (PD, S+ D+, moderate clinical impairment).

| Pat. ID  | Stage | aSyn Biomarker (S) | Dopamine Dysfunction Biomarker (D) | Clinical Signs and Symptoms    | Functional Impairment      |
|----------|-------|--------------------|------------------------------------|--------------------------------|----------------------------|
| ISS-PD1  | 4     | S+                 | D+                                 | Relevant motor/non-motor signs | Mild functional impairment |
| ISS-PD2  | 4     | S-                 | D+                                 | Relevant motor/non-motor signs | Mild functional impairment |
| ISS-PD3  | 4     | S+                 | D+                                 | Relevant motor/non-motor signs | Mild functional impairment |
| ISS-PD4  | 4     | S+                 | D+                                 | Relevant motor/non-motor signs | Mild functional impairment |
| ISS-PD5  | 4     | S+                 | D+                                 | Relevant motor/non-motor signs | Mild functional impairment |
| ISS-PD6  | 4     | S+                 | D+                                 | Relevant motor/non-motor signs | Mild functional impairment |
| ISS-PD7  | 4     | S-                 | D+                                 | Relevant motor/non-motor signs | Mild functional impairment |
| ISS-PD8  | 4     | S+                 | D+                                 | Relevant motor/non-motor signs | Mild functional impairment |
| ISS-PD9  | 4     | S+                 | D+                                 | Relevant motor/non-motor signs | Mild functional impairment |
| ISS-PD10 | 4     | S+                 | D+                                 | Relevant motor/non-motor signs | Mild functional impairment |
| ISS-PD11 | 4     | S+                 | D+                                 | Relevant motor/non-motor signs | Mild functional impairment |
| ISS-PD12 | 4     | S-                 | D+                                 | Relevant motor/non-motor signs | Mild functional impairment |
| ISS-PD13 | 4     | S+                 | D+                                 | Relevant motor/non-motor signs | Mild functional impairment |
| ISS-PD14 | 4     | S+                 | D+                                 | Relevant motor/non-motor signs | Mild functional impairment |
| ISS-PD15 | 4     | S+                 | D+                                 | Relevant motor/non-motor signs | Mild functional impairment |
| ISS-PD16 | 4     | S+                 | D+                                 | Relevant motor/non-motor signs | Mild functional impairment |
| ISS-PD17 | 4     | S-                 | D+                                 | Relevant motor/non-motor signs | Mild functional impairment |
| ISS-PD18 | 4     | S+                 | D+                                 | Relevant motor/non-motor signs | Mild functional impairment |
| ISS-PD19 | 4     | S+                 | D+                                 | Relevant motor/non-motor signs | Mild functional impairment |
| ISS-PD20 | 4     | S-                 | D+                                 | Relevant motor/non-motor signs | Mild functional impairment |
| ISS-PD21 | 4     | S+                 | D+                                 | Relevant motor/non-motor signs | Mild functional impairment |
| ISS-PD22 | 4     | S-                 | D+                                 | Relevant motor/non-motor signs | Mild functional impairment |
| ISS-PD23 | 4     | S+                 | D+                                 | Relevant motor/non-motor signs | Mild functional impairment |
| ISS-PD24 | 4     | S+                 | D+                                 | Relevant motor/non-motor signs | Mild functional impairment |
| ISS-PD25 | 4     | S+                 | D+                                 | Relevant motor/non-motor signs | Mild functional impairment |
| ISS-PD26 | 4     | S+                 | D+                                 | Relevant motor/non-motor signs | Mild functional impairment |
| ISS-PD27 | 4     | S+                 | D+                                 | Relevant motor/non-motor signs | Mild functional impairment |
| ISS-PD28 | 4     | S+                 | D+                                 | Relevant motor/non-motor signs | Mild functional impairment |
| ISS-PD29 | 4     | S+                 | D+                                 | Relevant motor/non-motor signs | Mild functional impairment |
| ISS-PD30 | 4     | S+                 | D+                                 | Relevant motor/non-motor signs | Mild functional impairment |
| ISS-PD31 | 4     | S+                 | D+                                 | Relevant motor/non-motor signs | Mild functional impairment |
| ISS-PD32 | 4     | S+                 | D+                                 | Relevant motor/non-motor signs | Mild functional impairment |
| ISS-PD33 | 4     | S+                 | D+                                 | Relevant motor/non-motor signs | Mild functional impairment |
| ISS-PD34 | 4     | S+                 | D+                                 | Relevant motor/non-motor signs | Mild functional impairment |
| ISS-PD35 | 4     | S+                 | D+                                 | Relevant motor/non-motor signs | Mild functional impairment |
| ISS-PD36 | 4     | S+                 | D+                                 | Relevant motor/non-motor signs | Mild functional impairment |
| ISS-PD37 | 4     | S+                 | D+                                 | Relevant motor/non-motor signs | Mild functional impairment |
| ISS-PD38 | 4     | S+                 | D+                                 | Relevant motor/non-motor signs | Mild functional impairment |
| ISS-PD39 | 4     | S+                 | D+                                 | Relevant motor/non-motor signs | Mild functional impairment |
| ISS-PD40 | 4     | S+                 | D+                                 | Relevant motor/non-motor signs | Mild functional impairment |
| ISS-PD41 | 4     | S+                 | D+                                 | Relevant motor/non-motor signs | Mild functional impairment |



| Pat. ID    | Stage | aSyn Biomarker (S) | Dopamine Dysfunction Biomarker (D) | Clinical Signs and Symptoms    | Functional Impairment      |
|------------|-------|--------------------|------------------------------------|--------------------------------|----------------------------|
| ISS-PD85   | 4     | S+                 | D+                                 | Relevant motor/non-motor signs | Mild functional impairment |
| ISS-PD86   | 4     | S+                 | D+                                 | Relevant motor/non-motor signs | Mild functional impairment |
| ISS-PD87   | 4     | S+                 | D+                                 | Relevant motor/non-motor signs | Mild functional impairment |
| ISS-PD88   | 4     | S+                 | D+                                 | Relevant motor/non-motor signs | Mild functional impairment |
| ISS-PD89   | 4     | S+                 | D+                                 | Relevant motor/non-motor signs | Mild functional impairment |
| ISS-PD90   | 4     | S+                 | D+                                 | Relevant motor/non-motor signs | Mild functional impairment |
| ISS-PD91   | 4     | S+                 | D+                                 | Relevant motor/non-motor signs | Mild functional impairment |
| ISS-PD92   | 4     | S+                 | D+                                 | Relevant motor/non-motor signs | Mild functional impairment |
| ISS-iRBD1  | 2B    | S+                 | D+                                 | Subtle clinical signs: iRBD    | No functional impairment   |
| ISS-iRBD2  | 2B    | S+                 | D+                                 | Subtle clinical signs: iRBD    | No functional impairment   |
| ISS-iRBD3  | 2B    | S+                 | D+                                 | Subtle clinical signs: iRBD    | No functional impairment   |
| ISS-iRBD4  | 2B    | S+                 | D+                                 | Subtle clinical signs: iRBD    | No functional impairment   |
| ISS-iRBD5  | 2B    | S+                 | D+                                 | Subtle clinical signs: iRBD    | No functional impairment   |
| ISS-iRBD6  | 2A    | S+                 | D-                                 | Subtle clinical signs: iRBD    | No functional impairment   |
| ISS-iRBD7  | 2A    | S+                 | D-                                 | Subtle clinical signs: iRBD    | No functional impairment   |
| ISS-iRBD8  | 2B    | S+                 | D+                                 | Subtle clinical signs: iRBD    | No functional impairment   |
| ISS-iRBD9  | 2A    | S+                 | D-                                 | Subtle clinical signs: iRBD    | No functional impairment   |
| ISS-iRBD10 | 2A    | S+                 | D-                                 | Subtle clinical signs: iRBD    | No functional impairment   |

**Supplementary Table 6:** Post hoc analysis using pairwise Fisher test for the chi-square test and the pairwise Dunn test for the Kruskal Wallis test; PD = Parkinson's Disease, HC = healthy control, iRBD = isolated REM sleep behavior disorder, n= number, sd = standard deviation, CSF: cerebrospinal fluid, MDS-UPDRS = Movement Disorders Society – United Parkinson's Disease Rating Scale, MMSE: Mini-Mental-State Examination, MoCa: Montreal Cognitive Assessment Score, BMI: Body-Mass-Index ns: non-significant

| <b>Chisq overall Test</b>                           |                 |                |               |          |  |  |                |
|-----------------------------------------------------|-----------------|----------------|---------------|----------|--|--|----------------|
| term                                                | chisq.statistic | chisq.chisq-df | chisq.p-value |          |  |  | p-value-signif |
| Sex                                                 | 8,65E+01        | 6,00E+00       | <0,0001       |          |  |  | ****           |
| $\alpha$ -synuclein seeding aggregation assay (SAA) | 8,65E+01        | 6,00E+00       | <0,0001       |          |  |  | ****           |
| <b>Fisher pairwise Sex post hoc Test</b>            |                 |                |               |          |  |  |                |
| group1                                              | group2          | n              | p             | p.adj    |  |  | p.adj.signif   |
| HC                                                  | PD              | 134            | 0,84          | 0,84     |  |  | ns             |
| HC                                                  | RBD             | 55             | 0,01          | 0,02     |  |  | *              |
| PD                                                  | RBD             | 97             | 0,01          | 0,02     |  |  | *              |
| <b>Fisher pairwise SAA post hoc Test</b>            |                 |                |               |          |  |  |                |
| group1                                              | group2          | n              | p             | p.adj    |  |  | p.adj.signif   |
| HC                                                  | PD              | 121            | 0,00E+00      | <0,0001  |  |  | ****           |
| HC                                                  | RBD             | 50             | 1,00E-07      | <0,0001  |  |  | ****           |
| PD                                                  | RBD             | 89             | 1,00E+00      | 1,00E+00 |  |  | ns             |

| <i>Kruskall Wallis overall Test</i>  |           |         |           |                         |    |           |       |              |
|--------------------------------------|-----------|---------|-----------|-------------------------|----|-----------|-------|--------------|
| term                                 | statistic | p.value | parameter | method                  |    |           |       | p-adj.signif |
| CSF $\beta$ -amyloid (A $\beta$ )    | 3,74      | 0,15    | 2         | Kruskal-Wallis rank sum |    |           |       | ns           |
| AGE                                  | 0,02      | 0,98    | 2         | Kruskal-Wallis rank sum |    |           |       | ns           |
| BMI                                  | 8,91      | 0,01    | 2         | Kruskal-Wallis rank sum |    |           |       | *            |
| CSF albumin quotient                 | 7,94      | 0,02    | 2         | Kruskal-Wallis rank sum |    |           |       | *            |
| MDS-UPDRS-III                        | 102,70    | <0,0001 | 2         | Kruskal-Wallis rank sum |    |           |       | ****         |
| MDS-UPDRS total score                | 95,09     | <0,0001 | 2         | Kruskal-Wallis rank sum |    |           |       | ****         |
| MMSE total score                     | 2,55      | 0,28    | 2         | Kruskal-Wallis rank sum |    |           |       | ns           |
| MoCa total score                     | 8,62      | 0,01    | 2         | Kruskal-Wallis rank sum |    |           |       | *            |
| CSF neurofilament light chains (NfL) | 16,52     | <0,001  | 2         | Kruskal-Wallis rank sum |    |           |       | ***          |
| Hoehn & Yahr                         | 109,39    | <0,0001 | 2         | Kruskal-Wallis rank sum |    |           |       | ****         |
| CSF phospho-tau protein (pTau)       | 5,45      | 0,06    | 2         | Kruskal-Wallis rank sum |    |           |       | ns           |
| CSF Total tau protein (tTau)         | 4,63      | 0,09    | 2         | Kruskal-Wallis rank sum |    |           |       | ns           |
| <i>Dunn Test pairwise post hoc</i>   |           |         |           |                         |    |           |       |              |
| term                                 | .y.       | group1  | group2    | n1                      | n2 | statistic | p.adj | p-adj.signif |
| CSF $\beta$ -amyloid (A $\beta$ )    | value     | HC      | PD        | 45                      | 88 | 0,06      | 1     | ns           |
| CSF $\beta$ -amyloid (A $\beta$ )    | value     | HC      | RBD       | 45                      | 3  | -1,88     | 0     | ns           |
| CSF $\beta$ -amyloid (A $\beta$ )    | value     | PD      | RBD       | 88                      | 3  | -1,93     | 0     | ns           |
| AGE                                  | value     | HC      | PD        | 46                      | 88 | 0,11      | 1     | ns           |
| AGE                                  | value     | HC      | RBD       | 46                      | 9  | -0,06     | 1     | ns           |
| AGE                                  | value     | PD      | RBD       | 88                      | 9  | -0,12     | 1     | ns           |
| BMI                                  | value     | HC      | PD        | 46                      | 88 | 1,94      | 0     | ns           |
| BMI                                  | value     | HC      | RBD       | 46                      | 9  | -1,50     | 0     | ns           |
| BMI                                  | value     | PD      | RBD       | 88                      | 9  | -2,58     | 0     | *            |
| CSF albumin quotient                 | value     | HC      | PD        | 46                      | 88 | 1,79      | 0     | ns           |
| CSF albumin quotient                 | value     | HC      | RBD       | 46                      | 9  | -1,47     | 0     | ns           |
| CSF albumin quotient                 | value     | PD      | RBD       | 88                      | 9  | -2,46     | 0     | *            |

| term                                 | .y.   | group1 | group2 | n1 | n2 | statistic | p.adj  | p-adj.signif |
|--------------------------------------|-------|--------|--------|----|----|-----------|--------|--------------|
| MDS-UPDRS-III                        | value | HC     | PD     | 46 | 88 | 9,90      | 0      | ****         |
| MDS-UPDRS-III                        | value | HC     | RBD    | 46 | 9  | 1,18      | 1      | ns           |
| MDS-UPDRS-III                        | value | PD     | RBD    | 88 | 9  | -3,92     | 0      | ***          |
| MDS-UPDRS total score                | value | HC     | PD     | 46 | 88 | 9,73      | 0      | ****         |
| MDS-UPDRS total score                | value | HC     | RBD    | 46 | 9  | 2,52      | 0      | *            |
| MDS-UPDRS total score                | value | PD     | RBD    | 88 | 9  | -2,43     | 0      | *            |
| MMSE total score                     | value | HC     | PD     | 44 | 87 | -1,60     | 0      | ns           |
| MMSE total score                     | value | HC     | RBD    | 44 | 9  | -0,44     | 1      | ns           |
| MMSE total score                     | value | PD     | RBD    | 87 | 9  | 0,38      | 1      | ns           |
| MoCA total score                     | value | HC     | PD     | 43 | 74 | -2,90     | 0      | *            |
| MoCA total score                     | value | HC     | RBD    | 43 | 9  | -0,51     | 1      | ns           |
| MoCA total score                     | value | PD     | RBD    | 74 | 9  | 1,05      | 1      | ns           |
| CSF neurofilament light chains (NfL) | value | HC     | PD     | 46 | 87 | 2,34      | 0      | ns           |
| CSF neurofilament light chains (NfL) | value | HC     | RBD    | 46 | 9  | -2,37     | 0      | ns           |
| CSF neurofilament light chains (NfL) | value | PD     | RBD    | 87 | 9  | -3,69     | 0      | ***          |
| Hoehn & Yahr                         | value | HC     | PD     | 46 | 88 | 9,97      | <0,001 | ****         |
| Hoehn & Yahr                         | value | HC     | RBD    | 46 | 9  | 0,30      | 1      | ns           |
| Hoehn & Yahr                         | value | PD     | RBD    | 88 | 9  | -4,88     | <0,001 | ****         |
| CSF phospho-tau protein (pTau)       | value | HC     | PD     | 44 | 85 | -1,08     | 1      | ns           |
| CSF phospho-tau protein (pTau)       | value | HC     | RBD    | 44 | 3  | -2,25     | 0      | ns           |
| CSF phospho-tau protein (pTau)       | value | PD     | RBD    | 85 | 3  | -1,94     | 0      | ns           |
| CSF Total tau protein (tTau)         | value | HC     | PD     | 45 | 88 | -1,32     | 1      | ns           |
| CSF Total tau protein (tTau)         | value | HC     | RBD    | 45 | 3  | -1,93     | 0      | ns           |
| CSF Total tau protein (tTau)         | value | PD     | RBD    | 88 | 3  | -1,55     | 0      | ns           |

**Supplementary Table 7.** Characteristics of the iRBD subjects, iRBD01, iRBD02 and iRBD03 showed phenoconversion to Parkinson's disease (08/2020; 03/2019; 04/2021) during Follow-up; all subjects showed hyposmia/anosmia indicated by TDI score <30, BDI >8 can indicate a depressive episode, mean NMS of 10 describes mild non-motor symptoms, abbreviations: MMSE: Mini-mental-state examination, sum score; PD-NMS: Parkinson's disease non-motor symptom scale, sum score; Becks depression index, sum score;

| Subject | Age, date of diagnosis | Sex | Baseline samples? | MMSE | PD-NMS | BDI | Sniffin sticks Threshold | Sniffin sticks discrimination | Sniffin sticks Identification | Sniffin sticks TDI score |
|---------|------------------------|-----|-------------------|------|--------|-----|--------------------------|-------------------------------|-------------------------------|--------------------------|
| iRBD01  | 65; Jun 12             | M   | Y                 | 29   | 6      | 3   | 1,5                      | 11                            | 3                             | 15,5                     |
| iRBD02  | 52; Apr 21             | F   | Y                 | 29   | 13     | 20  | 0                        | 5                             | 4                             | 9                        |
| iRBD03  | 77; Apr 21             | F   | Y                 | 28   | 8      | 6   | 6                        | 5                             | 1                             | 12                       |
| iRBD04  | 71; Jun 13             | M   | N                 | 30   | 15     | 6   | 4                        | 12                            | 8                             | 24                       |
| iRBD05  | 73; Dez 13             | F   | Y                 | 29   | 11     | 11  | 5                        | 7                             | 8                             | 20                       |
| iRBD06  | 68; Mrch 14            | F   | Y                 | 27   | 9      | 13  | 3                        | 8                             | 10                            | 21                       |
| iRBD07  | 62; Mrch 14            | F   | Y                 | 30   | 11     | 7   | 1,5                      | 6                             | 5                             | 12,5                     |
| iRBD08  | 51; Oct 14             | F   | Y                 | 29   | 11     | 7   | 5                        | 12                            | 13                            | 30                       |
| iRBD09  | 63; Apr 15             | M   | Y                 | 28   | 10     | 8   | 0                        | 0                             | 1                             | 1                        |
| iRBD10  | 55; Jun 16             | M   | N                 | 29   | 8      | 9   | -                        | -                             | 11                            | 11                       |
| iRBD11  | 53; May 16             | M   | N                 | 29   | 8      | 10  | 0,5                      | 1                             | 2                             | 3,5                      |
| iRBD12  | 72; Jun 13             | F   | Y                 | 28   | 14     | 18  | 1,25                     | 7                             | 5                             | 13,25                    |
| Mean    |                        |     |                   | 28,8 | 10,3   | 9,8 | 2,5                      | 6,7                           | 5,9                           | 14,4                     |
| SD      |                        |     |                   | 0,9  | 2,7    | 5,0 | 2,2                      | 4,0                           | 4,0                           | 8,3                      |
